# Supplementary material for: What is the quality of the maternal near-miss case reviews in WHO European Region? Cross-sectional study in Armenia, Georgia, Latvia, Republic of Moldova and Uzbekistan
Source: PubMed Central journal article supplement — BMJ Open. 2018 Apr 12;8(4):e017696. doi: 10.1136/bmjopen-2017-017696 (PMC5898291; doi:10.1136/bmjopen-2017-017696), 2018-04-12
Supplement: bmjopen-2017-017696.draft_revisions.pdf [file bmjopen-2017-017696.draft_revisions.pdf]

# BMJ Open

BMJ Open is committed to open peer review. As part of this commitment we make the peer review history of every article we publish publicly available.

When an article is published we post the peer reviewers' comments and the authors' responses online. We also post the versions of the paper that were used during peer review. These are the versions that the peer review comments apply to.

The versions of the paper that follow are the versions that were submitted during the peer review process. They are not the versions of record or the final published versions. They should not be cited or distributed as the published version of this manuscript.

BMJ Open is an open access journal and the full, final, typeset and author-corrected version of record of the manuscript is available on our site with no access controls, subscription charges or pay-per-view fees (<http://bmjopen.bmj.com>).

If you have any questions on BMJ Open's open peer review process please email [editorial.bmjopen@bmj.com](mailto:editorial.bmjopen@bmj.com)

# BMJ Open

## What is the quality of the maternal near-miss case reviews in the WHO European Region? cross-sectional study in Armenia, Georgia, Latvia, Republic of Moldova and Uzbekistan

|                                 |                                                                                                                                                                                                                                                                                                                                                                                                                                                                                                                                                                                                                                                                                                                                                                                                          |
|---------------------------------|----------------------------------------------------------------------------------------------------------------------------------------------------------------------------------------------------------------------------------------------------------------------------------------------------------------------------------------------------------------------------------------------------------------------------------------------------------------------------------------------------------------------------------------------------------------------------------------------------------------------------------------------------------------------------------------------------------------------------------------------------------------------------------------------------------|
| Journal:                        | <i>BMJ Open</i>                                                                                                                                                                                                                                                                                                                                                                                                                                                                                                                                                                                                                                                                                                                                                                                          |
| Manuscript ID                   | bmjopen-2017-017696                                                                                                                                                                                                                                                                                                                                                                                                                                                                                                                                                                                                                                                                                                                                                                                      |
| Article Type:                   | Research                                                                                                                                                                                                                                                                                                                                                                                                                                                                                                                                                                                                                                                                                                                                                                                                 |
| Date Submitted by the Author:   | 11-May-2017                                                                                                                                                                                                                                                                                                                                                                                                                                                                                                                                                                                                                                                                                                                                                                                              |
| Complete List of Authors:       | Bacci, Alberta; WHO Collaborating Centre for Maternal and Child Health, Institute for Maternal and Child Health IRCCS Burlo Garofolo Hodorozea, Stelian ; State Medical and Pharmaceutical University "N. Testemitanu", Khachatryan , Henrik ; WHO Country Office in Armenia Babojonova, Shohida ; Republican Perinatal Center Irsa, Signe ; Pauls Stradins Clinical University Hospital Jansone, Maira ; Riga Stradins University Dondiuc, Iurie ; Municipal Clinical Hospital Nr 1 Matarazde, George ; UNFPA Country Office Lazdane, Gunta ; Division of Noncommunicable Diseases and Promoting Health through the Life-course, WHO Regional Office for Europe Lazzerini, Marzia; WHO Collaborating Centre for Maternal and Child Health, Institute for Maternal and Child Health IRCCS Burlo Garofolo |
| <b>Primary Subject Heading</b>: | Global health                                                                                                                                                                                                                                                                                                                                                                                                                                                                                                                                                                                                                                                                                                                                                                                            |
| Secondary Subject Heading:      | Obstetrics and gynaecology                                                                                                                                                                                                                                                                                                                                                                                                                                                                                                                                                                                                                                                                                                                                                                               |
| Keywords:                       | Maternal health, near miss case review, standard based assessment, quality of care, middle income countries                                                                                                                                                                                                                                                                                                                                                                                                                                                                                                                                                                                                                                                                                              |
|                                 |                                                                                                                                                                                                                                                                                                                                                                                                                                                                                                                                                                                                                                                                                                                                                                                                          |

SCHOLARONE™  
Manuscripts

# What is the quality of the maternal near-miss case reviews in the WHO European Region? cross-sectional study in Armenia, Georgia, Latvia, Republic of Moldova and Uzbekistan

**Running title:** Quality of the near-miss case reviews

Alberta Bacci,<sup>1</sup> Stelian Hodorozea,<sup>2</sup> Henrik Khachatryan,<sup>3</sup> Shohida Babojonova,<sup>4</sup> Signe Irsa,<sup>5</sup> Maira Jansone,<sup>6</sup> Iurie Dondiuc,<sup>7</sup> George Matarazde,<sup>8</sup> Gunta Lazdane,<sup>9</sup> Marzia Lazzerini<sup>1</sup>

1 WHO Collaborating Centre for Maternal and Child Health, Institute for Maternal and Child Health IRCCS Burlo Garofolo, Via dell'Istria 65/1, 34137 Trieste, Italy.

2 State Medical and Pharmaceutical University "N. Testemitanu", Stefan cel Mare si Sfiant str. 165, MD2004, Chisinau, Moldova.

3 WHO Country Office in Armenia, 9, Alek Manukyan st., Suite 211, Yerevan 0070, Armenia

4 Republican Perinatal Center, Dj. Abidova str. 223, Tashkent, Uzbekistan.

5 Pauls Stradins Clinical University Hospital, Pilsoņu iela 13, LV-1002 Riga, Latvia

6 Riga Stradins University, Dzirciema street 16, Riga, LV-1007, Latvia

7 Municipal Clinical Hospital Nr 1, Melestiu 20 str. Chisinau, MD 2017, Moldova

8 UNFPA Country Office, 9 Eristavi str., UN House, Tbilisi 0179, Georgia

9 Division of Noncommunicable Diseases and Promoting Health through the Life-course, WHO Regional Office for Europe, UN City, Marmorvej 51, DK-2100 Copenhagen, Denmark

## Corresponding author

Marzia Lazzerini DTMH, MSc, PhD

WHO Collaborating Centre for Maternal and Child Health

Institute for Maternal and Child Health IRCCS Burlo Garofolo

Via dell'Istria 65/1, 34137, Trieste, ITALY

Tel: +39 040 3785 555 Fax: +39 040 3785 260

## Authors' e-mail contacts

AB: baccialberta@gmail.com

SH: stelian21@hotmail.com

HK: khachatryanh@who.int

SB: shohida\_bd@mail.ru

SI: Signe.Irsa@stradini.lv

MJ: Maira.Jansone@stradini.lv

ID: iurie\_dondiuc@yahoo.com

GM: mataradze@unfpa.org

GL: lazdaneg@who.int

ML: marzia.lazzerini@burlo.trieste.it

## ABSTRACT

**Objectives** The maternal near-miss case review (NMCR) cycle is a type of clinical audit aiming at improving quality of maternal health care by discussing near-miss cases. In several countries this approach has been introduced and supported by WHO and partners since 2004, but information on the quality of its implementation is missing. This study aimed at evaluating the quality of the NMCR implementation in selected countries within the WHO European Region.

**Design** Cross sectional study

**Settings** Twenty-three maternities in Armenia, Georgia, Latvia, Moldova, Uzbekistan

**Assessment tools** A predefined checklist including 50 items, according to the WHO methodology. Quality in the NMCR implementation was defined by summary scores ranging from 0 (totally inappropriate) to 3 (appropriate).

**Results** Quality of the NMCR implementation was heterogeneous among different countries, and within the same country. Overall, the first part of the audit cycle (from case identification to case analysis) was fairly well performed (average score 2.00, 95%CI 1.94 to 2.06), with the exception of the “inclusion of users views” (average score 0.66, 95%CI 0.11 to 1.22), while the second part (developing recommendations, implementing them, ensuring quality) was poorly performed (average score 0.66, 95%CI 0.11 to 1.22). Each country had at least one champion facility, where quality of the NMCR cycle was acceptable. Quality of the implementation was not associated with its duration. Gaps in implementation were of technical, organisational, and attitudinal nature.

**Conclusions** Ensuring quality in NMCR implementation may be difficult but achievable. The high heterogeneity in results within the same country suggests that quality of the NMCR implementation depends, to a large extent, from hospital factors, including staff's commitment, managerial support, local coordination. Efforts should be put in preventing and mitigating common barriers that hamper successful NMCR implementation.

### Article summary: strengths and limitations of this study

- Maternal near-miss case reviews (NMCR) are a type of clinical audit aiming at improving quality of maternal health care; evidence has showed that their use can be effective in reducing preventable mortality and morbidity, however their implementation can be challenging due to a number of reasons (technical, cultural organisational).
- This is the first study reporting on the quality of the NMCR in Central Asia and Eastern Europe.
- The assessment was based on a predefined checklist, providing the opportunity to evaluate the implementation of the NMCR approach in a standardised manner.
- Future assessments could monitor progress in specific areas, and extend the evaluation to other facilities/countries.
- More implementation studies should explore interventions aiming at improving quality of the NMCR implementation in different settings.

### Keywords

Maternal health; near miss case review; standard based assessment; quality of care; middle income countries

### Disclosure of interests

None competing interest

### List of abbreviations

MoH= Ministry of Health

NMCR= Near miss cases review

UNFPA= United Nation Population Fund

WHO = World Health Organization

## INTRODUCTION

Ensuring adequate quality of health care is a primary objective of the World Health Organization (WHO) Global Strategy for Women's, Children's and Adolescent's Health 2016-2030 (1) and of Health 2020, the European strategic framework setting the policy directions for the 53 Member States in the WHO European Region (2). Quality in health care is recognized as essential for the health and well-being of the population, and as a basic aspect of human rights (3-5).

Among the different strategies aiming at improving quality of care at maternity services, the facility-based maternal near miss cases review (NMCR) cycle was proposed by WHO in 2004 as a type of clinical audit (6-8). In respect to mortality audit, the near-miss case review has the advantage to imply less legal issues, and is therefore perceived as more acceptable by staff. Near-miss cases are defined as a woman who nearly died but survived a complication that occurred during pregnancy, childbirth or within six weeks after pregnancy (9). In the facility-based NMCR all hospital staff involved in the management of the chosen near-miss case - including midwives, nurses and ancillary staff - get together to discuss and evaluate the care provided against national evidence-based guidelines, local protocols and standards of care. The aim of the case review is to critically discuss local management, procedures and attitudes, and to identify areas that can be further improved (9). Actions to improve quality of maternal health care are proposed and agreed by hospital staff, and subsequently monitored to check their implementation, as for a continuous quality improvement process (9). One of the key characteristic of this

1  
2 methods is the bottom-up approach, aiming at facilitating local ownership of the process,  
3  
4 commitment in implementing the proposed recommendations, and team-building.  
5  
6 Currently, the review of severe maternal morbidity cases (“near-miss” events) is  
7  
8 recommended by WHO as a key action to eliminate avoidable maternal and perinatal  
9  
10 mortality and morbidity and improve the quality of care (10).  
11  
12  
13  
14  
15

16 While in some countries within the WHO European Region (such as UK, Norway, the  
17  
18 Netherlands) the practice of reviewing maternal near miss cases was introduced by the  
19  
20 government or by professional associations, with major investments, in several other  
21  
22 countries (most often middle-income countries) its implementation was assisted by the  
23  
24 WHO and/or United Nation Population Fund (UNFPA). In the later scenario, coverage and  
25  
26 quality of the NMCR implementation were usually discussed during workshops (11-13);  
27  
28 however, so far they were never evaluated according to a systematic methodology.  
29  
30  
31  
32  
33

34 In 2015, WHO developed a checklist for assessing the quality of the implementation of the  
35  
36 NMCR cycle through a systematic methodology (9). This study aimed at evaluating the  
37  
38 quality of the NMCR implementation in five countries of eastern Europe and central Asia,  
39  
40 using the WHO checklist, to identify common strengths and weaknesses among different  
41  
42 settings.  
43  
44  
45  
46  
47  
48  
49

## 50 MATERIAL AND METHODS

### 51 52 53 54 Population and setting

1  
2 The assessment was conducted in Armenia, Georgia, Latvia, Republic of Moldova, and  
3  
4 Uzbekistan between June 2015 and October 2016. Countries were chosen based on the  
5  
6 following criteria : i) activities planned by the Ministry of Health (MoH) included a quality  
7  
8 assessment of the NMCR; ii) there was a request for technical assistance from WHO or  
9  
10 UNFPA.  
11  
12

13  
14  
15  
16 In all of the countries the NMCR approach was introduced following the WHO  
17  
18 methodology (9). The year of NMCR introduction differed among countries: for example, in  
19  
20 Georgia piloting of NMCR started only six months before this assessment, while in the  
21  
22 Republic of Moldova it started 10 years before the assessment (Table 1).  
23  
24  
25

26  
27  
28 The number of facilities visited in each country depended on the total number of hospitals  
29  
30 implementing the NMCR cycle: in Armenia, Georgia and Latvia all facilities implementing  
31  
32 the NMCR were visited; in Moldova and Uzbekistan, where a large number of maternities  
33  
34 are implementing the NMCR, a sample was selected in agreement with the MoH and the  
35  
36 national NMCR coordinator/s, following a geographical criteria (i.e. so that different regions  
37  
38 were represented) and including different type of hospitals. Overall, 23 maternities were  
39  
40 visited in the five selected countries (Table 1).  
41  
42  
43  
44  
45

#### 46 47 **Data collection**

48  
49  
50 Each facility was visited for at least the duration of a whole day by two independent  
51  
52 external experts with long term experience in NMCR implementation. The international  
53  
54  
55  
56  
57  
58  
59



1  
2 team was joined by the national assessors, experienced in NMCR implementation at local  
3  
4 level. The team was under the leadership of one international assessor (AB), who  
5  
6 participated to all hospital visits, with the objective of ensuring standards procedures in all  
7  
8 assessments.  
9  
10

11  
12  
13  
14 The assessment was carried out using a checklist developed by WHO to evaluate the  
15  
16 quality of the NMCR cycle at hospital level (Table S1). The checklist was developed by  
17  
18 WHO in 2014, field tested and optimised for use in early 2015 (9). The methodology for the  
19  
20 quality assessment is fully described in a WHO manual (9). Briefly, the checklist includes  
21  
22 50 items, grouped in 11 domains. The sources of information for the assessment includes:  
23  
24 direct observation and evaluation of one or more NMCR sessions; discussion with  
25  
26 participants, coordinators and managers; documents from the NMCR sessions (templates  
27  
28 and notes from the sessions); local documents (regional/local policies and guidance  
29  
30 documents; protocols and standards for care; documents related to quality assurance,  
31  
32 monitoring and supervision; reports on NMCR activities); national documents (national  
33  
34 policies and guidance documents, guidelines, reports on NMCR implementation).  
35  
36 According to the WHO methodology, using the WHO manual (9) as source of standards,  
37  
38 each of the 50 items was scored from 0 (totally inappropriate) to 3 (appropriate) (Table  
39  
40 S1). For each of the 11 domains the arithmetic mean among all the items in that domain  
41  
42 was calculated.  
43  
44  
45  
46  
47  
48  
49  
50

51  
52 In each facility, immediately after the assessment, feedback were discussed with the local  
53  
54 staff and plans for improvement of the NMCR implementation were developed, using a  
55  
56  
57  
58  
59  
60

1  
2 simple matrix (Table S1).  
3  
4  
5

6 After completing the visits to all maternities in the country, a national restitution workshop  
7  
8 was organised involving representatives from the hospitals, health authorities, professional  
9  
10 organisations and partners. During the workshop, achievements and constrains were  
11  
12 presented and underlying reasons were discussed. Recommendations for improvement  
13  
14 were developed and synthesised in a standard pre-defined simple matrix (Table S1).  
15  
16  
17  
18  
19  
20

## 21 **Ethical considerations**

22  
23  
24  
25

26 Activities were initiated upon request of the MoH and carried out in close collaboration  
27  
28 with the country health authorities. Information to hospital staff was provided by MoH  
29  
30 representatives and local authorities. All people involved in the NMCR sessions were  
31  
32 informed about the purpose of the visit and oral consent from the hospital staff and local  
33  
34 coordinators and facilitators participating to the observed sessions was obtained. The  
35  
36 review of near-miss cases was carried forward anonymously, i.e. information that may  
37  
38 have disclosed the identity of the patient, or providers of care, were not reported (9). This  
39  
40 study did not aim at directly comparing countries or single facilities with different  
41  
42 background, context, and timelines of implementation, therefore results of the assessment  
43  
44 are reported in an anonymous way, according to WHO methodology (9). Detailed finding  
45  
46 of the assessment together with feedback on how to improve quality of the NMCR  
47  
48 implementation were provided to each facility and to each country individually.  
49  
50  
51  
52  
53  
54  
55  
56  
57  
58  
59  
60

## RESULTS

The assessment pointed out that quality of the implementation of the NMCR cycle was heterogeneous among different countries, as well as among different facilities within the same country. Table 2 reports the results of the summary scores, for each of the 11 domains of the WHO assessment checklist.

Overall, the first part of the audit cycle (step 1-6 in Table 2, i.e. from case identification to case analysis) was on average fairly well performed in all countries (average score 2.00, 95%CI 1.94 to 2.06), with the exception of the domain “inclusion of users’ views” which was poorly implemented in most facilities (average score 1.06, 95%CI 0.07 to 2.05). The second part of the audit cycle (step 7-10), which involves developing appropriate recommendations, implementation of the recommendations, follow up, documentation and dissemination of results within the facility and the country, was on average poorly performed in all countries (average score 1.20, 95%CI 0.93 to 1.46). In particular, The domain 11 “ensuring quality in the NMCR cycle”, which implies a process of periodical quality assessment, development of recommendation for quality improvement, and related actions, was substandard (average score 0.66, 95%CI 0.11 to 1.22), with the exception of country E, where regular monitoring and supervision was carried out by a team that included national and international members.

In each country it was possible to identify at least one “champion” facility, where quality of the NMCR cycle had only minor deficiencies (A-H3, B-H4, C-H1, D-H3, EH1 and H2). On the other hand, in a few facilities (A-H2, B-H1 and H3, CH6) most of the areas assessed

1  
2 were judged as “totally inappropriate”.  
3  
4  
5

6 In some facilities examples of good practices were also observed for single domains  
7  
8 problematic at a country-level. For examples, despite inclusion of users views was  
9  
10 substandard in most facilities in countries B and D (average scores 1.11, 95%CI 0 to 2.22  
11  
12 and 0.61, 95%CI 0 to 1.48 respectively) single facilities reached good scores (B-H4 had a  
13  
14 score of 3 and D-H3 had a score of 2), being able to regularly interview women and  
15  
16 incorporating their views in the development of recommendations to improve hospital care  
17  
18 (Table 2).  
19  
20  
21  
22  
23  
24

25 On average, quality of the implementation of NMCR was on a higher level in Country E,  
26  
27 where evaluation scores pointed out that there were only few weakness in implementation  
28  
29 compared to other countries (average score 2.12, 95%CI 1.84 to 2.39).  
30  
31  
32  
33

34 Table 3 summarises main common strengths and weaknesses in the quality of the NMCR  
35  
36 implementation, as divided in three categories: (i) those mostly related to technical  
37  
38 aspects, (ii) those predominantly of organisational nature, and (iii) those related to the  
39  
40 attitude toward the NMCR. The main technical strength was that, beside the existence of  
41  
42 appropriate technical skills in the methodology, most facilities developed several  
43  
44 recommendations that were achievable, realistic, time-bound- and with a potential impact  
45  
46 on the quality of care. Although recommendations were not always well documented (thus  
47  
48 resulting in low scores under domain 10, gaps in reporting not always indicated gaps in  
49  
50 implementation, and in many cases several recommendations were actually implemented.  
51  
52 This was a common observation in country B, where recommendations were poorly  
53  
54  
55  
56  
57  
58  
59  
60

1  
2 recorded, but several actions to improve quality of care -such as setting up emergency  
3  
4 kits and related protocols, and introducing the Modified Obstetric Early Warning Score  
5  
6 (MEOWS) chart (14)- were actually implemented. Among strength in organisational  
7  
8 aspects, the most important was that NMCR were regularly held, and staffing at all levels,  
9  
10 including midwives, participated. Main strengths in attitude included the endorsement and  
11  
12 application of the basic principles of the NMCR (confidentiality, openness, respecting  
13  
14 diverting opinions, avoiding blame).  
15  
16  
17  
18  
19  
20

21 Main gaps in technical aspects were: inappropriate case reconstruction; case analysis not  
22  
23 getting to the “real point” and not using a “why but why” approach (i.e. discussion of  
24  
25 underlying causes); recommendations not being fully SMART (Specific, Measurable,  
26  
27 Achievable, Realistic, Time-bound (15). Main gaps of organisational nature were: lack of  
28  
29 continuity in the role of facilitator/coordinator; lack of proper dissemination of the results  
30  
31 (i.e. circulation of information within the facility level and at national level on how many and  
32  
33 what type of recommendations were developed); lack of follow up on previous  
34  
35 recommendations. Major gaps in adopting the background philosophy and principles of the  
36  
37 NMCR were observed in some facilities such as: lack of respect for other people’s opinion;  
38  
39 persistence of blaming and judging others rather than using the NMCR cycle to discuss  
40  
41 and improve ways of working; insufficient involvement of mid-level staff. Lack of inclusion  
42  
43 of the users’ view, which was a frequent observation, was reported to be due to the lack of  
44  
45 trained interviewers, and this was interpreted as not merely an organisational gap, but also  
46  
47 as a gaps in attitude, i.e. lack of understanding the importance of taking into account the  
48  
49 women’s point of view (attitude of the providers). Finally, common to most facilities, there  
50  
51  
52  
53  
54  
55  
56  
57  
58  
59  
60

1  
2 was insufficient monitoring and evaluation, and lack of a quality assurance mechanism. In  
3  
4 most cases this gap was due to deficiencies in establishing and efficiently running a  
5  
6 NMCR coordination system at national level.  
7  
8  
9

10  
11 Recommendations developed by local stakeholders during the national restitution  
12  
13 workshops were setting-specific. Nevertheless, there were several similarities. The most  
14  
15 frequent/relevant recommendations developed for implementation at different levels -  
16  
17 hospital level, national level, WHO and development partners - are reported in Table 4.  
18  
19  
20

21  
22  
23 Examples of the observed impact of the NMCR on quality of care at facility level are  
24  
25 reported in Table S2. Despite progress was often poorly reported both in the hospital and  
26  
27 in national reports, several achievements could be observed. These included improved  
28  
29 use of national clinical guidelines, development and use of local protocols and standards  
30  
31 of care, better availability and organisation of emergency services, improved autonomy of  
32  
33 midwives, and positive dynamics such as improved team working.  
34  
35  
36  
37  
38  
39

## 40 DISCUSSION

41  
42  
43

44 This study aimed at evaluating the quality of the NMCR in selected countries within the  
45  
46 WHO European Region using a standardised checklist and methodology. Overall the  
47  
48 assessment pointed out that the practise of reviewing near-miss cases at hospital level is  
49  
50 currently ongoing in all countries included in this study; however, both coverage and  
51  
52 quality of the implementation of the NMCR cycle is heterogeneous. Overall, while first part  
53  
54 of the audit cycle (from case identification to case analysis) was fairly well performed, with  
55  
56  
57  
58  
59

1  
2 the exception of the “inclusion of users views”, the second part of the audit cycle  
3  
4 (developing recommendations, implementing them, ensuring quality) was in general poorly  
5  
6 performed. Gaps in implementation were both of technical, organisational, and attitudinal  
7  
8 nature.  
9  
10

11  
12  
13 These findings are not entirely surprising. Previous, although less systematic, evaluations  
14  
15 in the same geographical area pointed a series of challenges (7,8,11,12) in effectively  
16  
17 implementing the review of near-miss cases at facility level. Beside technical and  
18  
19 organisational challenges, the successful implementation of clinical audits such as the  
20  
21 NMCR often calls for a major change in staff’s attitude (7,8,11,12). In the country  
22  
23 assessed, especially in the Ex-Soviet countries, the successful implementation of the  
24  
25 NMCR aims at moving away from a “traditional” system of carrying forward clinical audits,  
26  
27 where blame and punishment were the routine, subjective judgment were the rule and  
28  
29 audit involved only doctors, while midwives, other mid-level staff and service users had no  
30  
31 voice (7,8,11,12). The “traditional” audit system mainly resulted in punishing single  
32  
33 individuals, rather than at looking to the health system failures and finding solutions at  
34  
35 organisational level (7,8,11,12). Changing practices involved building knowledge and skills  
36  
37 together with a drastic shift in attitude. Given these substantial constrains, the successful  
38  
39 implementation of the NMCR at least in one country (Country E) and in several champion  
40  
41 maternities in other countries, must be seen as a positive achievement, proving that  
42  
43 NMCR can be successfully implemented in different settings.  
44  
45  
46  
47  
48  
49  
50  
51  
52  
53

54 This paper reports the quality of the NMCR implementation in middle income countries  
55  
56 (Armenia, Moldova, Uzbekistan are lower middle income countries, Georgia is an upper  
57  
58

1  
2 middle income countries), where the NMCR was carried forward with relatively limited  
3  
4 resources. Findings of this assessment cannot be generalised to other high-income  
5  
6 countries of the WHO European region, such as UK, Norway, the Netherlands, where the  
7  
8 practice of reviewing maternal near miss cases has been institutionalised, with major  
9  
10 investments (16-18). However, it must be acknowledged that the review of near miss  
11  
12 cases at facility level is still not a routine practice in many European countries. We were  
13  
14 unable to identify any study reporting on a standard-based assessment of the quality of the  
15  
16 NMCR, from any country of the WHO European region.  
17  
18  
19  
20  
21  
22

23 Interestingly, findings of this study suggest that quality of the implementation of the NMCR  
24  
25 cycle is not strictly associated to the duration of the implementation: two countries where  
26  
27 implementation started respectively short term before this assessment (country C) and  
28  
29 long term before this assessment (country E) were the most successful in achieving high  
30  
31 quality in the NMCR cycle. However, it is also true that adequate time is needed for  
32  
33 implementation, and completing a pilot phase in a country cannot take less than 18-24  
34  
35 months from the first technical workshop. In this regards, it must be acknowledge that  
36  
37 country B started piloting just six months before the quality assessment; observed results  
38  
39 in this country can be interpreted as satisfying given the short time frame.  
40  
41  
42  
43  
44  
45  
46

47 The high heterogeneity in results within the same country (such as in the case of country  
48  
49 A, B, and D) suggests that quality of the NMCR implementation depends, to a large extent,  
50  
51 from hospital factors, including staff's commitment, managerial support, local coordination.  
52  
53 These results are in line with a systematic review on facilitators and barriers to effective  
54  
55 implementation of NMCR cycle, pointing out that hospital factors (good leadership),  
56  
57  
58  
59  
60



1  
2 together with a system of coordination (which often includes external support), are key  
3  
4 enablers for effective NMCR implementation (19).  
5  
6  
7

8 This assessment pointed out that, despite WHO recommends conducting an interview with  
9  
10 the women/her family for each near miss case, inclusion of women's view was still  
11  
12 substandard in many of the assessed facilities. However, some facilities (B-H4, D-H3)  
13  
14 reached good scores even when this domain was problematic at a country level (Table 2),  
15  
16 thus proving that the inclusion of users views was feasible. In the WHO framework,  
17  
18 experience of care is one of the two key components of quality of maternal and newborn  
19  
20 health care, along with provision of care (1,2). The views of women and their families can  
21  
22 provide relevant information on aspects related to case management, including important  
23  
24 details on what happened, such as organizational issues and communication issues which  
25  
26 are usually not reported in the medical notes. Additionally, user views can provide  
27  
28 important inputs for the development of recommendations, both related to improving case  
29  
30 management and to improve women's rights, such as the right to (unbiased) information,  
31  
32 and the right to a non-discriminatory care (1,2). In a study in Moldova it was observed that  
33  
34 the implementation of NMCR improved attitude towards patients (20), while in Kazakhstan  
35  
36 it successfully improved patients satisfaction (21,22).  
37  
38  
39  
40  
41  
42  
43  
44  
45  
46

47 This study points out that quality in the reporting on the NMCR activities was overall low.  
48  
49 The WHO manual now provides a series of templates to facilitate and uniform reporting  
50  
51 (9). Sustained monitoring and evaluation based on appropriate reporting, as well as  
52  
53 periodical quality assessments should be part of a strategy to achieve quality in the NMCR  
54  
55 implementation.  
56  
57  
58  
59  
60

1  
2  
3 This paper has the merit of reporting the actual state of implementation of NMCR, in a real  
4 setting and not in a study setting where the NMCR were implemented in a limited number  
5 of facilities, with dedicated human and financial resources, and for a limited period of time.  
6  
7  
8  
9  
10 Another strength of the study is that the evaluation was carried out in a systematic way  
11 using a predefined standardised tool and methodology, aiming at evaluating all key  
12 aspects that contribute to overall NMCR quality (table S1) (9). To our knowledge, no other  
13 previous similar systematic evaluations have been performed.  
14  
15  
16  
17  
18  
19  
20  
21  
22

23 We acknowledge that the scoring system utilised by the checklist may be open to some  
24 subjectivity. However, this scoring system is similar to other scoring systems extensively  
25 used by WHO in the last 15 years for systematic, standard based, quality assessments,  
26 and it proved to be able to capture key elements of quality of the implementation in both  
27 implementation and research settings (23-27). No other validated tools or scoring systems  
28 exist to assess quality of the NMCR. The checklist and its score system were field tested  
29 before use, until when they were considered satisfactory covering all key aspects of quality  
30 of NMCR (9). The score is attributed by a team of experts, thus reducing subjectivity of the  
31 single individual in the evaluation (9).  
32  
33  
34  
35  
36  
37  
38  
39  
40  
41  
42  
43  
44

45 As a second limitation we acknowledge that in two out of the total five countries (Moldova  
46 and Uzbekistan), although the sample of hospitals covered a significant proportion of  
47 deliveries, it remains a convenience sample based on MoH indications, and one cannot  
48 exclude a selection bias towards the better performing institutions. However, we  
49 emphasize that the main purpose of the assessment was to create an opportunity at  
50  
51  
52  
53  
54  
55  
56  
57  
58  
59  
60

1 national level do discuss quality of the NMCR, and develop recommendations for  
2 improvement. Subsequent assessments could monitor progress in specific areas, and  
3  
4 extend the evaluation to other facilities. The assessment could also be carried forward in  
5  
6 other countries. Based on the results of this study, in the future more efforts should be put  
7  
8 in evaluating the quality of the implementation of NMCR on a regular basis. More  
9  
10 implementation studies should explore interventions aiming at improving quality of the  
11  
12 NMCR implementation in different settings.  
13  
14  
15  
16  
17  
18  
19  
20

21 The objective of this study was not evaluating the impact of the implementation of the  
22  
23 NMCR, but rather the quality of the process. Nevertheless, several achievements could be  
24  
25 observed (Table S2), despite this type of information was not consistently available. These  
26  
27 results are in line with other studies (28-42) and a systematic review (39) reporting that  
28  
29 NMCR is an effective strategy in improving quality of care when measured against  
30  
31 predefined standards and it may even significantly reduce maternal mortality in high  
32  
33 burden countries (43).  
34  
35  
36  
37  
38  
39

## 40 **Conclusions**

41  
42  
43 Ensuring high quality in the implementation of the NMCR may be difficult in countries of  
44  
45 eastern Europe and central Asia but achievable. In the future more efforts should be put in  
46  
47 evaluating the quality of the implementation of NMCR on a regular basis, capitalising from  
48  
49 these lessons, and preventing and mitigating common barriers that hamper successful  
50  
51 implementation. The availability of a new manual on how to implement and to monitor the  
52  
53 NMCR at facility level, of a standard methodology for assessing quality of the NMCR, as  
54  
55  
56  
57  
58  
59  
60

1  
2 well as templates for reporting (9) may facilitate this process. More implementation studies  
3  
4 should explore interventions aiming at improving quality of the NMCR in different settings.  
5  
6  
7

### 8 **Acknowledgments**

9  
10 We would like to thank the local NMCR country coordinators, the hospitals staff, WHO  
11 regional and country staff and development partners who collaborated in the organisation  
12 of the assessment missions. We thank Sonia Richardson for language revision in this  
13 paper.  
14  
15  
16

### 17 **Funding**

18  
19 The assessment was supported by WHO Regional Office for Europe and UNFPA Regional  
20 Office for Eastern Europe and Central Asia  
21  
22  
23

### 24 **Author contributions**

25  
26 AB and ML conceived the study, analysed the data and wrote the first draft of the paper  
27  
28 AB, SH, HK, SB, SI, MJ, ID, GM, GL collected data and contribute to the final draft of the  
29 paper  
30  
31 GL and GM contributed by procuring funds  
32  
33 All author contributed to the final version of the paper.  
34  
35

### 36 **Data Sharing statement**

37  
38 Additional details on the country assessments can be obtain from the first author  
39  
40  
41  
42  
43  
44  
45  
46  
47  
48  
49  
50  
51  
52  
53  
54  
55  
56  
57  
58  
59  
60

## REFERENCES

1. World Health Organization. Global Strategy for Women's, Children's and Adolescent's Health 2016-2030 Available at <http://www.who.int/life-course/partners/global-strategy/global-strategy-2016-2030/en/> (accessed Dec 15, 2016)
2. World Health Organization (WHO), Regional Office for Europe. Health 2020: the European policy for health and well-being. WHO Regional Office for Europe, Copenhagen 2013. Available at <http://www.euro.who.int/en/health-topics/health-policy/health-2020-the-european-policy-for-health-and-well-being/publications/2013/health-2020-a-european-policy-framework-and-strategy-for-the-21st-century> (accessed Dec 15, 2016)
3. World Health Organization (WHO). The prevention and elimination of disrespect and abuse during facility-based childbirth. World Health Organization, Geneva, 2014. Available at [http://apps.who.int/iris/bitstream/10665/134588/1/WHO\\_RHR\\_14.23\\_eng.pdf?ua=1&ua=1](http://apps.who.int/iris/bitstream/10665/134588/1/WHO_RHR_14.23_eng.pdf?ua=1&ua=1) (accessed Sept 15, 2016)
4. Tunçalp O, Were WM, MacLennan C, Oladapo OT, Gülmezoglu AM, Bahl R, Daelmans B, Mathai M, Say L, Kristensen F, Temmerman M, Bustreo F. Quality of care for pregnant women and newborns—the WHO vision. *BJOG*. 2015 Jul;122(8):1045-9.
5. World Health Organization, Standards for improving quality of maternal and newborn care in health facilities. Geneva: World Health Organization, 2016. Available at [http://www.who.int/maternal\\_child\\_adolescent/documents/improving-maternal-newborn-care-quality/en/](http://www.who.int/maternal_child_adolescent/documents/improving-maternal-newborn-care-quality/en/) (accessed Sept 15, 2016)
6. World Health Organization. Beyond the numbers: Reviewing maternal deaths and complications to make pregnancy safer. World Health Organization, Geneva, 2004. Available at <http://whqlibdoc.who.int/publications/2004/9241591838.pdf?ua=1> (accessed Sept 15, 2016)
7. Bacci A, Lewis G, Baltag V, Betrán AP. The introduction of confidential enquiries into maternal deaths and near-miss case reviews in the WHO European Region. *Reprod Health Matters*. 2007 Nov;15(30):145-52.
8. Bacci A. Implementing “Beyond The Numbers” across the WHO European Region: steps adopted, challenges, successes and current status. *Entre Nous* 2010; 70; 6-7.
9. World Health Organization. Regional Office for Europe. Conducting a maternal near-miss case review cycle at the hospital level” manual with practical tools. Available at <http://www.euro.who.int/en/health-topics/Life-stages/maternal-and-newborn-health/publications/2016/conducting-a-maternal-near-miss-case-review-cycle-at-hospital-level-2016> (accessed November 29, 2016)
10. World Health Organization Regional Office for Europe. Action plan for sexual and reproductive health: towards achieving the 2030 Agenda for Sustainable Development in Europe – leaving no one behind. Copenhagen: World Health Organization Regional Office for Europe; 2016. Available at [http://www.euro.who.int/\\_\\_data/assets/pdf\\_file/0018/314532/66wd13e\\_SRHActionPlan\\_160524.pdf](http://www.euro.who.int/__data/assets/pdf_file/0018/314532/66wd13e_SRHActionPlan_160524.pdf) (accessed Nov 15, 2016)

- 1  
2  
3  
4  
5  
6  
7  
8  
9  
10  
11  
12  
13  
14  
15  
16  
17  
18  
19  
20  
21  
22  
23  
24  
25  
26  
27  
28  
29  
30  
31  
32  
33  
34  
35  
36  
37  
38  
39  
40  
41  
42  
43  
44  
45  
46  
47  
48  
49  
50  
51  
52  
53  
54  
55  
56  
57  
58  
59  
60
11. World Health Organization. Regional Office for Europe. Multi-Country review meeting on maternal mortality and morbidity audit "Beyond the Numbers", Report of a WHO meeting, Charvak, Uzbekistan 14–17 June 2010. Copenhagen, WHO Regional Office for Europe, 2010. Available at <http://www.euro.who.int/en/health-topics/Life-stages/maternal-and-newborn-health/publications/2010/multi-country-review-meeting-on-maternal-mortality-and-morbidity-audit-beyond-the-numbers,-report-of-a-who-meeting,-charvak,-uzbekistan-1417-june-2010> (accessed September 8, 2016).
12. World Health Organization. Regional Office for Europe. The impact of implementation of 'Beyond the numbers' approach in improving maternal and perinatal health. 29-30 April 2014, Bishkek, Kyrgyzstan. Copenhagen, WHO Regional Office for Europe, 2014. Available at <http://www.euro.who.int/en/media-centre/events/events/2014/04/the-impact-of-implementation-of-beyond-the-numbers-approach-in-improving-maternal-and-perinatal-health> (accessed September 8, 2016).
13. WHO Regional Office for Europe Making Pregnancy Safer in Uzbekistan. Maternal mortality and morbidity audit Activities Report 2002-2008. Available at [http://www.euro.who.int/\\_data/assets/pdf\\_file/0004/98797/MPS\\_UZB.pdf](http://www.euro.who.int/_data/assets/pdf_file/0004/98797/MPS_UZB.pdf) (accessed september 8, 2016)
14. The Royal Free Hospital Nhs Trust Maternity Clinical Guidelines. MEOWS Guidance in Maternity. Available at [http://www.oaa-anaes.ac.uk/assets/\\_managed/editor/file/guidelines/meows/royal%20free%20meows%20guideline%20-%20mcglennan\\_.pdf](http://www.oaa-anaes.ac.uk/assets/_managed/editor/file/guidelines/meows/royal%20free%20meows%20guideline%20-%20mcglennan_.pdf) (accessed November 29, 2016)
15. Doran, G. T. (1981). "There's a S.M.A.R.T. way to write management's goals and objectives". Management Review (AMA FORUM) 70 (11): 35–36
16. Knight M, Lewis G, Acosta CD, Kurinczuk JJ. Maternal near-miss case reviews: the UK approach. BJOG. 2014 Sep;121 Suppl 4:112-6.
17. Marr L, Lennox C, McFadyen AK. Quantifying severe maternal morbidity in Scotland: a continuous audit since 2003. Curr Opin Anaesthesiol. 2014 Jun;27(3):275-81.
18. Knight M; INOSS. The International Network of Obstetric Survey Systems (INOSS): benefits of multi-country studies of severe and uncommon maternal morbidities. Acta Obstet Gynecol Scand. 2014 Feb;93(2):127-31.
19. Lazzerini M, Ciuch M, Covi B, Rusconi S, Bacci A. Facilitators and barriers to the effective implementation of the facility based maternal near-miss case reviews in low and middle income countries: qualitative systematic review (submitted for publication)
20. Baltag V, Filippi V, Bacci A. Putting theory into practice: the introduction of obstetric near-miss case reviews in the Republic of Moldova. Int J Qual Health Care. 2012 Apr;24(2):182-8
21. Sukhanberdiyev K, Ayazbekov A, Issina A, Abuova G, Hodorocea S, Bacci A. Initial experience of Near Miss Case Review: improving the management of haemorrhage. Entre Nous 2011: 74; 18-19.
22. Hodorocea S. Piloting near miss case reviews in Kazakhstan: improving quality of maternal care. Entre Nous 2010: 70; 28-29.

- 1  
2  
3  
4  
5  
6  
7  
8  
9  
10  
11  
12  
13  
14  
15  
16  
17  
18  
19  
20  
21  
22  
23  
24  
25  
26  
27  
28  
29  
30  
31  
32  
33  
34  
35  
36  
37  
38  
39  
40  
41  
42  
43  
44  
45  
46  
47  
48  
49  
50  
51  
52  
53  
54  
55  
56  
57  
58  
59  
60
23. Duke T, Keshishyan E, Kuttumuratova A, Ostergren M, Ryumina I, Stasii E, Weber MW, Tamburlini G. Quality of hospital care for children in Kazakhstan, Republic of Moldova, and Russia: systematic observational assessment. *Lancet*. 2006 Mar 18;367(9514):919-25.
24. Lazzarini M, Shukurova V, Davletbaeva M, Monolbaev K, Kulichenko T, Akoev Y, Bakradze M, Margieva T, Mityushino I, Namazova-Baranova L, Boronbayeva E, Kuttumuratova A, Weber MW, Tamburlini G. Improving the quality of hospital care for children by supportive supervision: a cluster randomized trial, Kyrgyzstan. *Who bull* 2016 (online first)  
[http://www.who.int/bulletin/online\\_first/BLT.16.176982.pdf?ua=1](http://www.who.int/bulletin/online_first/BLT.16.176982.pdf?ua=1)
25. Tamburlini G, Yadgarova K, Kamilov A, Bacci A; Maternal and Neonatal Care Quality Improvement Working Group. Improving the quality of maternal and neonatal care: the role of standard based participatory assessments. *PLoS One*. 2013 Oct 22;8(10):e78282.
26. Tamburlini G, Siupsinskas G, Bacci A; Maternal and Neonatal Care Quality Assessment Working Group.. Quality of maternal and neonatal care in Albania, Turkmenistan and Kazakhstan: a systematic, standard-based, participatory assessment. *PLoS One*. 2011;6(12):e28763.
27. Campbell H, Duke T, Weber M, English M, Carai S, Tamburlini G; Pediatric Hospital Improvement Group.. Global initiatives for improving hospital care for children: state of the art and future prospects. *Pediatrics*. 2008 Apr;121(4):e984-92.
28. Kayiga H, Ajeani J, Kiondo P, Kaye DK. Improving the quality of obstetric care for women with obstructed labour in the national referral hospital in Uganda: lessons learnt from criteria based audit. *BMC Pregnancy Childbirth*. 2016 Jul 11;16(1):152.
29. Mohd Azri MS, Edahayati AT, Kunasegaran K. Audit on management of eclampsia at Sultan Abdul Halim Hospital. *Med J Malaysia*. 2015 Jun;70(3):142-7.
30. Gebrehiwot Y, Tewolde BT. Improving maternity care in Ethiopia through facility based review of maternal deaths and near misses. *Int J Gynaecol Obstet*. 2014 Oct;127 Suppl 1:S29-34.
31. Luz AG, Osis MJ, Ribeiro M, Cecatti JG, Amaral E. Impact of a nationwide study for surveillance of maternal near-miss on the quality of care provided by participating centers: a quantitative and qualitative approach. *BMC Pregnancy Childbirth*. 2014 Apr 1;14:122
32. Kidanto HL, Wangwe P, Kilewo CD, Nystrom L, Lindmark G. Improved quality of management of eclampsia patients through criteria based audit at Muhimbili National Hospital, Dar es Salaam, Tanzania. Bridging the quality gap. *BMC Pregnancy Childbirth*. 2012 Nov 21;12:134.
33. van den Akker T, van Rhenen J, Mwangomba B, Lommerse K, Vinkhumbo S, van Roosmalen J. Reduction of severe acute maternal morbidity and maternal mortality in Thyolo District, Malawi: the impact of obstetric audit. *PLoS One*. 2011;6(6):e20776. doi: 10.1371/journal.pone.0020776. Epub 2011 Jun 3.
34. Bailey PE, Binh HT, Bang HT. Promoting accountability in obstetric care: use of criteria-based audit in Viet Nam. *Glob Public Health*. 2010;5(1):62-74.
35. van den Akker T, Mwangomba B, Irlam J, van Roosmalen J. Using audits to reduce the incidence of uterine rupture in a Malawian district hospital. *Int J Gynaecol Obstet*. 2009 Dec;107(3):289-94. doi: 10.1016/j.ijgo.2009.09.005. Epub 2009 Oct 28.

- 1  
2  
3  
4  
5  
6  
7  
8  
9  
10  
11  
12  
13  
14  
15  
16  
17  
18  
19  
20  
21  
22  
23  
24  
25  
26  
27  
28  
29  
30  
31  
32  
33  
34  
35  
36  
37  
38  
39  
40  
41  
42  
43  
44  
45  
46  
47  
48  
49  
50  
51  
52  
53  
54  
55  
56  
57  
58  
59  
60
36. Hunyinbo KI, Fawole AO, Sotiloye OS, Otolorin EO. Evaluation of criteria-based clinical audit in improving quality of obstetric care in a developing country hospital. *Afr J Reprod Health*. 2008 Dec;12(3):59-70
  37. Kongnyuy EJ, Leigh B, van den Broek N. Effect of audit and feedback on the availability, utilisation and quality of emergency obstetric care in three districts in Malawi. *Women Birth*. 2008 Dec;21(4):149-55.
  38. Kongnyuy EJ, Mlava G, van den Broek N. Criteria-based audit to improve a district referral system in Malawi: a pilot study. *BMC Health Serv Res*. 2008 Sep 22;8:190.
  39. Müffler N, Trabelssi M, De Brouwere V. Scaling up clinical audits of obstetric cases in Morocco. *Tropical Medicine & International Health* 2007. 12(10), 1248-1257
  40. Weeks AD, Alia G, Ononge S, Otolorin EO, Mirembe FM. A criteria-based audit of the management of severe pre-eclampsia in Kampala, Uganda. *Int J Gynaecol Obstet*. 2005 Dec;91(3):292-7; discussion 283-4.
  41. Wagaarachchi PT, Graham WJ, Penney GC, McCaw-Binns A, Yeboah Antwi K, Hall MH. Holding up a mirror: changing obstetric practice through criterion-based clinical audit in developing countries. *Int J Gynaecol Obstet*. 2001 Aug;74(2):119-30
  42. Lazzarini M, Richardson S, Ciardelli S, Erenbourg A. Impact of facility based maternal near-miss case reviews in improving maternal and newborn quality of care in low and middle income countries: systematic review submitted for publication)



**Table 1. Characteristics of the countries and of the maternities assessed**

|                                                                | Armenia                  | Georgia                  | Latvia                    | Moldova                   | Uzbekistan               |
|----------------------------------------------------------------|--------------------------|--------------------------|---------------------------|---------------------------|--------------------------|
| World Bank Classification <sup>1</sup>                         | Lower middle income      | Upper Middle Income      | High income               | Lower middle income       | Lower middle income      |
| Population (thousands), total*                                 | 2969                     | 4358                     | 2060                      | 3514                      | 28541                    |
| GNI per capita, PPP US\$*                                      | 6990                     | 3280                     | 21020                     | 3690                      | 1720                     |
| Maternal mortality ratio, adjusted*                            | 30                       | 67                       | 34                        | 41                        | 28                       |
| Neonatal mortality rate <sup>2</sup>                           | 10                       | 15                       | 5                         | 9                         | 14                       |
| Institutional deliveries as % of total deliveries <sup>2</sup> | 99.4                     | 98.3                     | NA                        | 99.4                      | 97.3                     |
| National introductory workshop on NMCR <sup>3</sup>            | 2007                     |                          | 2012                      | 2005                      | 2005                     |
| First national technical workshop on NMCR <sup>3</sup>         | 2009                     | 2015                     | 2013                      | 2005                      | 2007                     |
| Number of hospital implementing NMCR <sup>3</sup>              | 3                        | 6                        | 2                         | 13                        | 62                       |
| Number of hospital assessed                                    | 3                        | 6                        | 2                         | 6                         | 6                        |
| Type of hospitals                                              | 1 regional<br>2 district | 2 regional<br>4 district | 1 regional,<br>1 district | 2 regional,<br>4 district | 3 regional<br>3 district |
| Number of births/year in the hospital assessed **              | 6125                     | 8570                     | 8152                      | 13311                     | 23309                    |

<sup>1</sup> Source: The World Bank, Country and Lending Groups. (2014) Historical classification. Available: <https://datahelpdesk.worldbank.org/knowledgebase/articles/906519> (Accessed 9 March 2017).

<sup>2</sup> Source: UNICEF Country statistics [http://www.unicef.org/statistics/index\\_countrystats.html](http://www.unicef.org/statistics/index_countrystats.html) (accessed Dec 7, 2016)

<sup>3</sup> Source: WHO mission reports

**Table 2. Summary scores**

|                                         | A   |     |     | B   |     |     |     |     |     | C   |     | D   |     |     |     |     |     | E   |     |     |     |     |     |
|-----------------------------------------|-----|-----|-----|-----|-----|-----|-----|-----|-----|-----|-----|-----|-----|-----|-----|-----|-----|-----|-----|-----|-----|-----|-----|
|                                         | H1  | H2  | H3  | H1  | H2  | H3  | H4  | H5  | H6  | H1  | H2  | H1  | H2  | H3  | H4  | H5  | H6  | H1  | H2  | H3  | H4  | H5  | H6  |
| 1. Internal organisation                | 1   | 1   | 2.5 | 1   | 2.1 | 0.8 | 2.8 | 2.3 | 1.9 | 3   | 2   | 1.7 | 1.9 | 1.9 | 1.6 | 2.5 | 0.5 | 2.9 | 2.6 | 2.7 | 2.3 | 2.7 | 2.3 |
| 2. Case identification                  | 2.3 | 1   | 1.5 | 2   | 3   | 2   | 3   | 3   | 3   | 3   | 2.3 | 2.2 | 2.5 | 2.8 | 3   | 2   | 2.1 | 3   | 3   | 3   | 3   | 0.7 | 3   |
| 3. Respect of ground rules              | 1.5 | 1.5 | 2.5 | 1   | 2   | 1   | 3   | 3   | 2   | 3   | 3   | 2   | 1.5 | 1   | 1.5 | 2   | 1   | 3   | 3   | 3   | 3   | 3   | 3   |
| 4. Case presentation                    | 1.6 | 1.4 | 2   | 0.3 | 2   | 0.7 | 2.3 | 2   | 0.7 | 2.5 | 3   | 1.8 | 0.8 | 2.5 | 1.7 | 2.3 | 1.2 | 2.3 | 1.7 | 1.3 | 1   | 2   | 2   |
| 5. Inclusion of users views             | 0   | 0   | 0   | 0.3 | 1.7 | 0   | 3   | 1.2 | 0.5 | 2.5 | 1.3 | 0.3 | 0   | 2   | 0   | 1.4 | 0   | 1.8 | 2.6 | 2   | 1.4 | 1.2 | 1.2 |
| 6. Case analysis                        | 1.5 | 1   | 2.5 | 0.1 | 1.4 | 0.3 | 2   | 1.6 | 1.2 | 2.1 | 2.6 | 2.2 | 0.9 | 2   | 1.4 | 1.3 | 0.7 | 2.5 | 2.8 | 1.7 | 1   | 2.4 | 1.3 |
| 7. Development of recommendations       | 0.3 | 1   | 2   | 0.1 | 1.1 | 0   | 2   | 1.8 | 1.7 | 1.8 | 2.6 | 1.8 | 0.1 | 2.3 | 1   | 1.9 | 0.4 | 3   | 2.6 | 1.7 | 1   | 2.3 | 1.3 |
| 8. Implementation of recommendations    | 0   | 0.5 | 2   | 0   | 0   | 0   | 1   | 1.7 | 2   | 2   | 1.3 | 0.8 | 0   | 3   | 0.8 | 2   | 0.5 | 3   | 2.5 | 1.5 | 2.5 | 3   | 3   |
| 9. Follow up                            | 0   | 0   | 1.5 | 0   | 0   | 0   | 0   | 0   | 3   | 2   | 2.5 | 0   | 0   | 3   | 0   | 1.6 | 1.3 | 2.8 | 1.5 | 1.5 | 1.5 | 2   | 1.5 |
| 10. Documentation and results diffusion | 0.3 | 0.3 | 2   | 0.5 | 1   | 0.5 | 2.5 | 1   | 2   | 1.7 | 1   | 0.8 | 0.6 | 1.5 | 1.1 | 0.6 | 0.3 | 1.8 | 2   | 2.5 | 2   | 2.7 | 1   |
| 11. Ensuring quality in the NMCR        | 0   | 0   | 0   | NA  | NA  | NA  | NA  | NA  | NA  | 1   | 1   | 0   | 0   | 0   | 0   | 1   | 0.3 | 1.5 | 1.7 | 1.2 | 1.2 | 1.2 | 1.2 |

NA= in country B piloting started only six months before the quality assessment; for this reason the domain 11 was considered not applicable

**Colour legend**

RED= scores between 0.0 to 0.9

YELLOW= scores between 1.0 at 1.9

GREEN= scores between 2.0 at 3.0

**Table 3. Recommendations made by local stakeholders on how to improve NMCR quality**

|                                           |                                                                                                                                                                                                                                                                                                                                                                                                                                                                                                                                                                                                                                                                                                                                                                                                                                                                                                                                                                                                 |
|-------------------------------------------|-------------------------------------------------------------------------------------------------------------------------------------------------------------------------------------------------------------------------------------------------------------------------------------------------------------------------------------------------------------------------------------------------------------------------------------------------------------------------------------------------------------------------------------------------------------------------------------------------------------------------------------------------------------------------------------------------------------------------------------------------------------------------------------------------------------------------------------------------------------------------------------------------------------------------------------------------------------------------------------------------|
| <b>Hospital level</b>                     | <ol style="list-style-type: none"> <li>1) Ensure managerial support for the organisation of the NMCR and for the implementation of the resulting recommendations</li> <li>2) Aim at regular sessions</li> <li>3) Ensure active participation of all staff involved in case management, including mid-level staffing</li> <li>4) Ensure that ground rules are respected</li> <li>5) Ensure that the review follows the steps suggested in the WHO manual <sup>(7)</sup></li> <li>6) Ensure that user's views are collected and taken into consideration</li> <li>7) Ensure that recommendations developed are SMART*</li> <li>8) Ensure that every session starts by following up on the previous recommendations</li> <li>9) Document the implementation of the recommendations (provide date and description)</li> <li>10) Document, analyse and disseminate results of the NMCR at hospital level, including type of recommendations developed and percentage of those implemented</li> </ol> |
| <b>National level</b>                     | <ol style="list-style-type: none"> <li>1) Set up/strengthen the national coordinating team</li> <li>2) Develop a plan for regular quality assessment and reinforcement</li> <li>3) Strengthen technical skills among staffing on the principles, methods and practices of the NMCR cycle</li> <li>4) Practical training on how to conduct interviews in order to collect women's views</li> <li>5) Support networking activities among facilities (eg exchange visits)</li> <li>6) Document, analyse and disseminate results of the NMCR at national level</li> </ol>                                                                                                                                                                                                                                                                                                                                                                                                                           |
| <b>WHO and other development partners</b> | <ol style="list-style-type: none"> <li>1) Ensure regular and timely technical support for capacity development, including developing skills for women interviews</li> <li>2) Provide support for developing legal framework and national guidance manual for NMCR</li> <li>3) Support regular monitoring of the implementation in a coordinated manner</li> <li>4) Support results dissemination and discussion</li> <li>5) Support timely quality assessments and subsequent actions for quality improvement</li> <li>6) Support networking activities among facilities /countries with the objective of improve quality of NMCR cycle</li> <li>7) Ensure continuous support for updating key national guidelines, local protocols, standards for clinical practice</li> </ol>                                                                                                                                                                                                                 |

Abbreviations: NM= near-miss; NMCR= near-miss case review; SMART= Specific, Measurable, Achievable, Realistic, Time-bound (15)

**Table 4. Strength and weakness observed in the quality of the NMCR implementation**

|                     | <b>STRENGTH</b>                                                                                                                                                                                                                                                                                                                                                                                                                                                                                                                                                                                                                                                                                                                                                                                                                              | <b>WEAKNESS</b>                                                                                                                                                                                                                                                                                                                                                                                                                                                                                                                                                                                                                                                                                                                                                                                                                                                   |
|---------------------|----------------------------------------------------------------------------------------------------------------------------------------------------------------------------------------------------------------------------------------------------------------------------------------------------------------------------------------------------------------------------------------------------------------------------------------------------------------------------------------------------------------------------------------------------------------------------------------------------------------------------------------------------------------------------------------------------------------------------------------------------------------------------------------------------------------------------------------------|-------------------------------------------------------------------------------------------------------------------------------------------------------------------------------------------------------------------------------------------------------------------------------------------------------------------------------------------------------------------------------------------------------------------------------------------------------------------------------------------------------------------------------------------------------------------------------------------------------------------------------------------------------------------------------------------------------------------------------------------------------------------------------------------------------------------------------------------------------------------|
| <b>TECHNICAL</b>    | <p>In all countries:</p> <ul style="list-style-type: none"> <li>▪ Technical skills on performing NMCR were on average fair</li> <li>▪ Local protocols were on average present and used</li> <li>▪ Recommendations were usually developed, with several SMART characteristics (Achievable, Realistic, Time-bound)</li> </ul> <p>Especially in Country E:</p> <ul style="list-style-type: none"> <li>▪ Most maternity teams were able to analyze efficiently a NM case, and to develop relevant recommendations to improve quality and organization of care, and follow-up their implementation.</li> </ul>                                                                                                                                                                                                                                    | <ul style="list-style-type: none"> <li>▪ Case definition not complying with national definition</li> <li>▪ Lack of existence and use of local protocols for case analysis</li> <li>▪ Some lack of knowledge and skills in NMCR methodology</li> </ul> <p>Case summary, case reconstruction door-to-door, case analysis (including getting to the real point, and what we did good, shortcomings and underlying reasons using the 'why-but-why') not performed well performed in all facilities</p> <ul style="list-style-type: none"> <li>▪ Recommendations not fully SMART* (often not Specific nor Measurable)</li> </ul>                                                                                                                                                                                                                                       |
| <b>ORGANISATION</b> | <p>In all countries:</p> <ul style="list-style-type: none"> <li>▪ Staffing at all levels (including midwives and nurses) was involved and in some cases encouraged by facilitator to actively participate in the review process.</li> <li>▪ Session participants were mostly those involved in care provision of the case reviewed, and, generally, felt free to ask questions and express their opinions.</li> <li>▪ NMCR mostly happened on a regular basis</li> </ul> <p>Especially in Country E:</p> <ul style="list-style-type: none"> <li>▪ An excellent national plan for implementation was developed</li> <li>▪ Appropriate normative regulations were developed through regular NMCR sessions</li> <li>▪ By 2015, 90% of maternity facilities were trained and implementing NMCR</li> </ul> <p>Regional NMCR coordinators were</p> | <ul style="list-style-type: none"> <li>▪ Lack of local written procedure for NMCR</li> <li>▪ Irregular meetings in some facilities</li> <li>▪ Lack of involvement of staffing who managed the case</li> <li>▪ Lack of a regional/national coordination and/or continuity in facilitator/coordinator role, and/or support from them</li> <li>▪ Lack of trained interviewers</li> <li>▪ Absence of local leaders</li> <li>▪ Lack of support from hospital manager in organisation of the NMCR and in the implementation of the recommendation</li> <li>▪ Lack of follow up on previous recommendations</li> <li>▪ Lack of production, dissemination and discussion of results of the NMCR cycle</li> <li>▪ Lack of periodical evaluations of the quality of the NMCR</li> <li>▪ When evaluations of the quality was performed, no mechanism ensured that</li> </ul> |

|                 |                                                                                                                                                                                                                                                                                                                                                                                                                                                                                                                                                                                                                                                                                                                                                                                                                                                                                                                                                                                                                                                                                                                                                                                      |                                                                                                                                                                                                                                                                                                                                                                                                                                                                                                                                                                                                                                                                                                                                                                                                                                                                                                                              |
|-----------------|--------------------------------------------------------------------------------------------------------------------------------------------------------------------------------------------------------------------------------------------------------------------------------------------------------------------------------------------------------------------------------------------------------------------------------------------------------------------------------------------------------------------------------------------------------------------------------------------------------------------------------------------------------------------------------------------------------------------------------------------------------------------------------------------------------------------------------------------------------------------------------------------------------------------------------------------------------------------------------------------------------------------------------------------------------------------------------------------------------------------------------------------------------------------------------------|------------------------------------------------------------------------------------------------------------------------------------------------------------------------------------------------------------------------------------------------------------------------------------------------------------------------------------------------------------------------------------------------------------------------------------------------------------------------------------------------------------------------------------------------------------------------------------------------------------------------------------------------------------------------------------------------------------------------------------------------------------------------------------------------------------------------------------------------------------------------------------------------------------------------------|
|                 | <p>established</p> <ul style="list-style-type: none"> <li>▪ There was sustained support from MoH; WHO and partners (also Latvia)</li> </ul>                                                                                                                                                                                                                                                                                                                                                                                                                                                                                                                                                                                                                                                                                                                                                                                                                                                                                                                                                                                                                                          | <p>resulting recommendations were taken up</p>                                                                                                                                                                                                                                                                                                                                                                                                                                                                                                                                                                                                                                                                                                                                                                                                                                                                               |
| <b>ATTITUDE</b> | <p>In all countries</p> <ul style="list-style-type: none"> <li>▪ Basic BTN principles were respected in most facilities, including confidentiality</li> <li>▪ Multidisciplinary approach to case reviews was evident in most facilities             <ul style="list-style-type: none"> <li>▪ Managers offered substantial support to organization of NMCR sessions and implementation of recommendations.</li> </ul> </li> <li>▪ Staff found this method useful to improve quality and organization of care</li> <li>▪ Midwives role as participants, but also as coordinators and facilitators</li> </ul> <p>Interviews became a routine in most facilities (in particular in Latvia)</p> <p>Especially in Country E::</p> <ul style="list-style-type: none"> <li>▪ Facilitators succeeded to create and maintain an open and non-threatening environment during sessions; staff felt free to put forward (or ask) questions and express their opinions (also Country C)</li> <li>▪ The point of view of women was always collected and presented; some interviews were of excellent quality (also Country C)</li> <li>▪ Professionals were praised in case of good care</li> </ul> | <ul style="list-style-type: none"> <li>▪ In some cases lack of respect of other people's opinion, persistence of blaming, persistence of a wrong attitude that suggested "judging others", rather than moving towards thinking "the review is about us"</li> <li>▪ Lack of active participation in the discussion</li> <li>▪ Insufficient involvement of mid-level staffing</li> <li>▪ Lack of the interviews with woman in some facilities</li> <li>▪ Even where the interview was collected, women's view not taken into account when recommendation are implemented</li> <li>▪ Staff not always praised when quality and appropriate care given</li> <li>▪ Staff considers developing recommendations a mere formality, they were not eager to implement them, and take on the role and the responsibility to change practice.</li> <li>▪ Persistence of a system that advocates punishment in some facilities</li> </ul> |

Abbreviations: NM= near-miss; NMCR= near-miss case review; SMART= Specific, Measurable, Achievable, Realistic, Time-bound (15)

**Table S1. Checklist to assess the quality of the NMCR cycle at hospital level and matrix to develop local recommendations**

| <b>Checklist to assess the quality of the NMCR cycle at hospital level and matrix to develop local recommendations</b>                                                                                                                                                                                                                                                                                                                                                                                                                                                                                                                                                                                                                                                                                                                                                                                                                                                                                                                                                                                                                                                                                                                                                                                                               |            |
|--------------------------------------------------------------------------------------------------------------------------------------------------------------------------------------------------------------------------------------------------------------------------------------------------------------------------------------------------------------------------------------------------------------------------------------------------------------------------------------------------------------------------------------------------------------------------------------------------------------------------------------------------------------------------------------------------------------------------------------------------------------------------------------------------------------------------------------------------------------------------------------------------------------------------------------------------------------------------------------------------------------------------------------------------------------------------------------------------------------------------------------------------------------------------------------------------------------------------------------------------------------------------------------------------------------------------------------|------------|
| Facility name _____                                                                                                                                                                                                                                                                                                                                                                                                                                                                                                                                                                                                                                                                                                                                                                                                                                                                                                                                                                                                                                                                                                                                                                                                                                                                                                                  | Date _____ |
| <b>INSTRUCTIONS</b>                                                                                                                                                                                                                                                                                                                                                                                                                                                                                                                                                                                                                                                                                                                                                                                                                                                                                                                                                                                                                                                                                                                                                                                                                                                                                                                  |            |
| Sources of information:                                                                                                                                                                                                                                                                                                                                                                                                                                                                                                                                                                                                                                                                                                                                                                                                                                                                                                                                                                                                                                                                                                                                                                                                                                                                                                              |            |
| <ul style="list-style-type: none"> <li>▶ Direct observation and evaluation of a NMCR session</li> <li>▶ Discussion with participants</li> <li>▶ Discussion with coordinators and managers               <ul style="list-style-type: none"> <li>➢ Documents from the NMCR sessions: Records/notes of the sessions: templates, cases summaries, summary of the interviews with women and other care-takers (family, documents in support of the recommendations and their implementation, other related documentation (photo etc.)</li> </ul> </li> <li>▶ Other related documents:               <ul style="list-style-type: none"> <li>National documents                   <ul style="list-style-type: none"> <li>➢ National policies, and guidance documents</li> <li>➢ National clinical guidelines</li> <li>➢ National documents related to quality assurance, monitoring and supervision</li> <li>➢ National summary reports on NMCR implementation</li> </ul> </li> <li>Local documents                   <ul style="list-style-type: none"> <li>➢ Regional/local policies, and guidance documents</li> <li>➢ Local clinical protocols and standards for care provision</li> <li>➢ Local documents related to quality assurance, monitoring and supervision</li> <li>➢ Local summary reports</li> </ul> </li> </ul> </li> </ul> |            |
| Reference: the reference for all key items is the WHO manual "How to implement the maternal Near-Miss Case Review (NMCR) cycle at hospital level"                                                                                                                                                                                                                                                                                                                                                                                                                                                                                                                                                                                                                                                                                                                                                                                                                                                                                                                                                                                                                                                                                                                                                                                    |            |
| Methods of scoring:                                                                                                                                                                                                                                                                                                                                                                                                                                                                                                                                                                                                                                                                                                                                                                                                                                                                                                                                                                                                                                                                                                                                                                                                                                                                                                                  |            |
| 1) Score each single item as follows: Score 0= totally inappropriate; Score 1= major problems; Score 2= some deficiencies; Score 3= appropriate.                                                                                                                                                                                                                                                                                                                                                                                                                                                                                                                                                                                                                                                                                                                                                                                                                                                                                                                                                                                                                                                                                                                                                                                     |            |
| 2) In the blue row calculate the mean of the scores for each key item in the group. This is the score for that group of items.                                                                                                                                                                                                                                                                                                                                                                                                                                                                                                                                                                                                                                                                                                                                                                                                                                                                                                                                                                                                                                                                                                                                                                                                       |            |

|                                                                                                                         | <b>SCORE</b> | <b>Comments</b> |
|-------------------------------------------------------------------------------------------------------------------------|--------------|-----------------|
| <b>INTERNAL ORGANISATION/PREPARATION</b>                                                                                |              |                 |
| 1. A local written procedure to implement the NMCR cycle exists                                                         |              |                 |
| 2. Support from management is adequate                                                                                  |              |                 |
| 3. Regular meetings are held                                                                                            |              |                 |
| 4. Each meeting has adequate duration                                                                                   |              |                 |
| 5. All key staff involved in the NM case is invited to the session                                                      |              |                 |
| 6. Very limited (and justified) participation of people who were not involved in the management of the NM case reviewed |              |                 |
| 7. All material need is prepared before the session                                                                     |              |                 |
| <b>CASE IDENTIFICATION AND SELECTION</b>                                                                                |              |                 |
| 8. The agreed NM definition is used (same definition in all the country)                                                |              |                 |

|    |                                                                          |  |  |
|----|--------------------------------------------------------------------------|--|--|
| 1  | 9. The NM cases are correctly identified                                 |  |  |
| 2  | 10. A NM case is appropriately selected for review among those           |  |  |
| 3  | identified                                                               |  |  |
| 4  |                                                                          |  |  |
| 5  |                                                                          |  |  |
| 6  | <b>GROUND RULES</b>                                                      |  |  |
| 7  |                                                                          |  |  |
| 8  | 11. Ground rules for the NMCR are respected, especially                  |  |  |
| 9  | confidentiality, respect of other people's opinion and refrain           |  |  |
| 10 | from blaming single individuals                                          |  |  |
| 11 |                                                                          |  |  |
| 12 | <b>NMCR SESSION: CASE PRESENTATION</b>                                   |  |  |
| 13 | 12. The case is appropriately summarised and presented by one            |  |  |
| 14 | participant (paper copies; flip charts; slides)                          |  |  |
| 15 | 13. A "door to door" reconstruction, with all relevant details, is       |  |  |
| 16 | provided by all staff involved in care provision                         |  |  |
| 17 | 14. The clinical records of the patient, whose case is reviewed, are     |  |  |
| 18 | available during the meeting, if additional information is needed        |  |  |
| 19 |                                                                          |  |  |
| 20 | <b>NMCR SESSION: INCLUSION OF USERS VIEWS</b>                            |  |  |
| 21 | 15. The opinions of the woman ( <i>i.e. informative contents on real</i> |  |  |
| 22 | <i>facts, and her perceptions and views</i> ), and if appropriate of     |  |  |
| 23 | relatives and/or friends, is collected (interview), for each NM          |  |  |
| 24 | case reviewed                                                            |  |  |
| 25 | 16. The interview(s) is/are appropriately summarised and presented       |  |  |
| 26 | 17. The key findings from the interview ( <i>i.e. same definition as</i> |  |  |
| 27 | <i>above</i> ) are appropriately taken into consideration in the case    |  |  |
| 28 | analysis                                                                 |  |  |
| 29 | 18. The key findings ( <i>i.e. same definition as above</i> ) from the   |  |  |
| 30 | interview are appropriately taken into consideration for the             |  |  |
| 31 | prioritisation and development of solution                               |  |  |
| 32 |                                                                          |  |  |
| 33 | <b>NMCR SESSION: CASE ANALYSIS</b>                                       |  |  |
| 34 | 19. The case-analysis is performed following a structured analytical     |  |  |
| 35 | approach                                                                 |  |  |
| 36 | 20. The case management is analysed from admission to discharge:         |  |  |
| 37 | a "door to door" approach is used                                        |  |  |
| 38 | 21. The case is reviewed comparing actual management versus              |  |  |
| 39 | evidence (clinical guidelines, protocols and standards)                  |  |  |
| 40 | 22. The positive aspects of care provision ("what we did good") are      |  |  |
| 41 | identified and documented                                                |  |  |
| 42 | 23. The staff is praised for the positive aspects of care provision      |  |  |
| 43 | 24. The critical aspects of care ("what did not go well") are            |  |  |
| 44 | appropriately identified, focusing on the most important issues          |  |  |
| 45 | ("getting to the real point")                                            |  |  |
| 46 | 25. The real underlying reasons for substandard care ("why but           |  |  |
| 47 | why?") are identified, discussed and documented                          |  |  |
| 48 | 26. The facilitator ensures that ground rules are respected, all steps   |  |  |
| 49 | of the session are completed, notes are taken                            |  |  |
| 50 | 27. Staff of all types and roles (including midwives and nurses)         |  |  |
| 51 | actively and openly participate in the case analysis                     |  |  |
| 52 | 28. The results of the case-analysis are documented (using the           |  |  |
| 53 | templates)                                                               |  |  |
| 54 |                                                                          |  |  |
| 55 | <b>NMCR SESSION: DEVELOPMENT OF RECOMMENDATIONS</b>                      |  |  |
| 56 | 29. A list of SPECIFIC recommendations linked to the NM case is          |  |  |
| 57 | always developed, including responsible people and timelines             |  |  |
| 58 | 30. The recommendations target the main problem (s) and the              |  |  |
| 59 | main underlying factors                                                  |  |  |

|                                                                                                                                                                                                                                          |  |  |
|------------------------------------------------------------------------------------------------------------------------------------------------------------------------------------------------------------------------------------------|--|--|
| 31. Most of the recommendations refer to actions to be carried forward at the hospital performing the review                                                                                                                             |  |  |
| 32. The recommendations use as reference clinical guidelines, protocols and standards                                                                                                                                                    |  |  |
| 33. The recommendations are SMART (specific, measurable, achievable, realistic, time-bound)                                                                                                                                              |  |  |
| 34. The recommendations give due consideration to women's rights in hospital: effective communication, emotional support, respect and dignity                                                                                            |  |  |
| 35. The recommendations include an adequate division of tasks among hospital staff                                                                                                                                                       |  |  |
| 36. Recommendations that need action at regional/national level are effectively identified                                                                                                                                               |  |  |
| 37. The facilitator ensures that ground rules are respected, all steps of the session are completed, notes are taken                                                                                                                     |  |  |
| 38. Staff of all types and roles (including midwives and nurses) participate actively and openly                                                                                                                                         |  |  |
| 39. The recommendations are documented (using the templates)                                                                                                                                                                             |  |  |
| <b>IMPLEMENTATION OF RECCOMENDATIONS</b>                                                                                                                                                                                                 |  |  |
| 40. The agreed recommendations are implemented (at least 75%)                                                                                                                                                                            |  |  |
| 41. Managers/local health authorities actively support implementation of recommendations                                                                                                                                                 |  |  |
| 42. The implementation of recommendations is documented (using the template)                                                                                                                                                             |  |  |
| <b>NMCR SESSION: FOLLOW UP</b>                                                                                                                                                                                                           |  |  |
| 43. The NMCR session starts with a follow up of the previous session, checking that recommendations have been implemented                                                                                                                |  |  |
| 44. In case the agreed actions were not taken, reasons are discussed, and a new recommendation is developed, including responsible people and timelines                                                                                  |  |  |
| <b>DOCUMENTATIONS ON THE NMCR CYCLE AND EFFECTIVE DIFFUSION OF RESULTS - AT FACILITY LEVEL</b>                                                                                                                                           |  |  |
| 45. A folder is kept for each NM case containing all key documentation, including the follow up phase (see manual); cases are recorded in a register/log book                                                                            |  |  |
| 46. At hospital level, an appropriate summary of relevant information regarding the NMCR cycle is regularly disseminated and discussed, without compromising confidentiality, among staff, managers, and health authorities (see manual) |  |  |
| 47. Effective communication of key information is provided by hospital coordinators to national coordinator(s)                                                                                                                           |  |  |
| <b>ENSURING QUALITY IN THE NMCR CYCLE</b>                                                                                                                                                                                                |  |  |
| 48. Collaboration of the local team with the national/regional coordinator has been effective                                                                                                                                            |  |  |
| 49. Periodical evaluations of the quality of the NMCR has been planned                                                                                                                                                                   |  |  |
| 50. Previous recommendations from quality assessment has been taken into consideration and translated into actions                                                                                                                       |  |  |



**SUMMARY TABLE****MAIN STRENGTHS:**

- 1.
- 2.
- 3.
- 4.

**MAIN WEAKNESSES:**

- 1.
- 2.
- 3.
- 4.

**COMMENTS:**

- 1.
- 2.
- 3.
- 4.

**MATRIX. Recommendations for improving the quality of the NMCR cycle at hospital level (expand as needed)**

| Priority areas that need to be improved | Action agreed | Responsible person | Timeline |
|-----------------------------------------|---------------|--------------------|----------|
|                                         |               |                    |          |
|                                         |               |                    |          |
|                                         |               |                    |          |
|                                         |               |                    |          |
|                                         |               |                    |          |
|                                         |               |                    |          |
|                                         |               |                    |          |
|                                         |               |                    |          |
|                                         |               |                    |          |

**Table S2. Reported impact of the NMCR on quality of care at facility level**

- Use of national clinical guidelines
- Development and use of protocols at facility level (for doctors and for midwives) for obstetric complications (eg post-partum haemorrhages, eclampsia, sepsis)
- Development and implementation of standards of care
- Development of capacities among staff of all levels (doctors, midwives, nurses) to critically analyse cases identifying real underlying reasons for near-miss (eg lack of organisation or lack of communication), comparing management to guidelines, protocols and standards of care, and to successfully carry forward a self-assessment
- Improved autonomy of mid level staff, in particular midwives providing first emergency care without doctors
- Availability of emergency team 24/24h in case of emergencies ~~ease~~
- In the admission and on labour ward, a system in place which allows to call all relevant staff in case of an emergency (emergency button)
- Availability of emergency lab 24/24h
- Availability of staff 24/24h in the event of a need for blood transfusion, especially in rural areas
- Set up of separate room for managing emergency cases
- Availability of emergency kit for managing emergency cases
- Improved availability of essential drugs, such as misoprostol, i/v antihypertensive
- Enhanced collaboration between clinical staff and management of the facility, for improving practical aspects of organisation of care (eg supplies, maintenance, staff shifts)
- Development of clear job description to specific roles and responsibilities, facilitating effective team work
- Improved monitoring after caesarean section and/or obstetric complications (eg training and use of checklists)
- Improved team work
- Reported improvement in quality of care delivered \*

\*not further specified in available local/national reports.

# BMJ Open

## What is the quality of the maternal near-miss case reviews in the WHO European Region? Cross-sectional study in Armenia, Georgia, Latvia, Republic of Moldova and Uzbekistan

|                                 |                                                                                                                                                                                                                                                                                                                                                                                                                                                                                                                                                                                                                                                                                                                                                                                                          |
|---------------------------------|----------------------------------------------------------------------------------------------------------------------------------------------------------------------------------------------------------------------------------------------------------------------------------------------------------------------------------------------------------------------------------------------------------------------------------------------------------------------------------------------------------------------------------------------------------------------------------------------------------------------------------------------------------------------------------------------------------------------------------------------------------------------------------------------------------|
| Journal:                        | <i>BMJ Open</i>                                                                                                                                                                                                                                                                                                                                                                                                                                                                                                                                                                                                                                                                                                                                                                                          |
| Manuscript ID                   | bmjopen-2017-017696.R1                                                                                                                                                                                                                                                                                                                                                                                                                                                                                                                                                                                                                                                                                                                                                                                   |
| Article Type:                   | Research                                                                                                                                                                                                                                                                                                                                                                                                                                                                                                                                                                                                                                                                                                                                                                                                 |
| Date Submitted by the Author:   | 02-Nov-2017                                                                                                                                                                                                                                                                                                                                                                                                                                                                                                                                                                                                                                                                                                                                                                                              |
| Complete List of Authors:       | Bacci, Alberta; WHO Collaborating Centre for Maternal and Child Health, Institute for Maternal and Child Health IRCCS Burlo Garofolo Hodorozea, Stelian ; State Medical and Pharmaceutical University "N. Testemitanu", Khachatryan , Henrik ; WHO Country Office in Armenia Babojonova, Shohida ; Republican Perinatal Center Irsa, Signe ; Pauls Stradins Clinical University Hospital Jansone, Maira ; Riga Stradins University Dondiuc, Iurie ; Municipal Clinical Hospital Nr 1 Matarazde, George ; UNFPA Country Office Lazdane, Gunta ; Division of Noncommunicable Diseases and Promoting Health through the Life-course, WHO Regional Office for Europe Lazzerini, Marzia; WHO Collaborating Centre for Maternal and Child Health, Institute for Maternal and Child Health IRCCS Burlo Garofolo |
| <b>Primary Subject Heading</b>: | Global health                                                                                                                                                                                                                                                                                                                                                                                                                                                                                                                                                                                                                                                                                                                                                                                            |
| Secondary Subject Heading:      | Obstetrics and gynaecology                                                                                                                                                                                                                                                                                                                                                                                                                                                                                                                                                                                                                                                                                                                                                                               |
| Keywords:                       | Maternal health, near miss case review, standard based assessment, quality of care, middle income countries                                                                                                                                                                                                                                                                                                                                                                                                                                                                                                                                                                                                                                                                                              |
|                                 |                                                                                                                                                                                                                                                                                                                                                                                                                                                                                                                                                                                                                                                                                                                                                                                                          |

SCHOLARONE™  
Manuscripts

# What is the quality of the maternal near-miss case reviews in the WHO European Region? Cross-sectional study in Armenia, Georgia, Latvia, Republic of Moldova and Uzbekistan

**Running title:** Quality of the near-miss case reviews

Alberta Bacci,<sup>1</sup> Stelian Hodoroagea,<sup>2</sup> Henrik Khachatryan,<sup>3</sup> Shohida Babojonova,<sup>4</sup> Signe Irsa,<sup>5</sup> Maira Jansone,<sup>6</sup> Iurie Dondiuc,<sup>7</sup> George Matarazde,<sup>8</sup> Gunta Lazdane,<sup>9</sup> Marzia Lazzerini<sup>1</sup>

1 WHO Collaborating Centre for Maternal and Child Health, Institute for Maternal and Child Health IRCCS Burlo Garofolo, Via dell'Istria 65/1, 34137 Trieste, Italy.

2 State Medical and Pharmaceutical University "N. Testemitanu", Stefan cel Mare si Sfiant str. 165, MD2004, Chisinau, Moldova.

3 WHO Country Office in Armenia, 9, Alek Manukyan st., Suite 211, Yerevan 0070, Armenia

4 Republican Perinatal Center, Dj. Abidova str. 223, Tashkent, Uzbekistan.

5 Pauls Stradins Clinical University Hospital, Pilsoņu iela 13, LV-1002 Riga, Latvia

6 Riga Stradins University, Dzirciema street 16, Riga, LV-1007, Latvia

7 Municipal Clinical Hospital Nr 1, Melestiu 20 str. Chisinau, MD 2017, Moldova

8 UNFPA Country Office, 9 Eristavi str., UN House, Tbilisi 0179, Georgia

9 Division of Noncommunicable Diseases and Promoting Health through the Life-course, WHO Regional Office for Europe, UN City, Marmorvej 51, DK-2100 Copenhagen, Denmark

## Corresponding author

Marzia Lazzerini DTMH, MSc, PhD

WHO Collaborating Centre for Maternal and Child Health

Institute for Maternal and Child Health IRCCS Burlo Garofolo

Via dell'Istria 65/1, 34137, Trieste, ITALY

Tel: +39 040 3785 555 Fax: +39 040 3785 260

## Authors' e-mail contacts

AB: [baccialberta@gmail.com](mailto:baccialberta@gmail.com)

SH: [stelian21@hotmail.com](mailto:stelian21@hotmail.com)

HK: [khachatryanh@who.int](mailto:khachatryanh@who.int)

SB: [shohida\\_bd@mail.ru](mailto:shohida_bd@mail.ru)

SI: [Signe.Irsa@stradini.lv](mailto:Signe.Irsa@stradini.lv)

MJ: [Maira.Jansone@stradini.lv](mailto:Maira.Jansone@stradini.lv)

ID: [iurie\\_dondiuc@yahoo.com](mailto:iurie_dondiuc@yahoo.com)

GM: [mataradze@unfpa.org](mailto:mataradze@unfpa.org)

GL: [lazdaneg@who.int](mailto:lazdaneg@who.int)

ML: [marzia.lazzerini@burlo.trieste.it](mailto:marzia.lazzerini@burlo.trieste.it)

## ABSTRACT

**Objectives** The maternal near-miss case review (NMCR) cycle is a type of clinical audit aiming at improving quality of maternal health care by discussing near-miss cases. In several countries this approach has been introduced and supported by WHO and partners since 2004, but information on the quality of its implementation is missing. This study aimed at evaluating the quality of the NMCR implementation in selected countries within the WHO European Region.

**Design** Cross sectional study

**Settings** Twenty-three maternity units in Armenia, Georgia, Latvia, Moldova, Uzbekistan

**Assessment tools** A predefined checklist including 50 items, according to the WHO methodology. Quality in the NMCR implementation was defined by summary scores ranging from 0 (totally inappropriate) to 3 (appropriate).

**Results** Quality of the NMCR implementation was heterogeneous among different countries, and within the same country. Overall, the first part of the audit cycle (from case identification to case analysis) was fairly well performed (average score 2.00, 95%CI 1.94 to 2.06), with the exception of the "inclusion of users views" (average score 0.66, 95%CI 0.11 to 1.22), while the second part (developing recommendations, implementing them, ensuring quality) was poorly performed (average score 0.66, 95%CI 0.11 to 1.22). Each country had at least one champion facility, where quality of the NMCR cycle was acceptable. Quality of the implementation was not associated with its duration. Gaps in implementation were of technical, organisational, and attitudinal nature.

**Conclusions** Ensuring quality in the NMCR may be difficult but achievable. The high heterogeneity in results within the same country suggests that quality of the NMCR implementation depends, to a large extent, from hospital factors, including staff's commitment, managerial support, local coordination. Efforts should be put in preventing and mitigating common barriers that hamper successful NMCR implementation.

## Article summary: strengths and limitations of this study

- This is the first study reporting on the quality of the hospital based near-miss case review (NMCR) in Central Asia and Eastern Europe.
- The assessment included five countries within the WHO European Region and was based on a predefined checklist, providing the opportunity to evaluate the implementation of the NMCR approach in a standardised manner.
- In three countries facilities included in the evaluation accounted for all facilities implementing the NMCR within in the country. In the remaining two countries, where the NMCR were implemented in more hospitals, facilities were chosen in dialogue with local authorities (non-probability sampling), and not at random; however, criteria used to select facilities included also geographical distribution (i.e. so that different regions were represented) and hospital type (i.e. different types of hospitals were selected).

### Keywords

Maternal health; near miss case review; standard based assessment; quality of care; middle-income countries

### Disclosure of interests

None competing interest

### List of abbreviations

MoH= Ministry of Health

NMCR= Near miss cases review

UNFPA= United Nation Population Fund

WHO = World Health Organization

## INTRODUCTION

Ensuring adequate quality of health care is a primary objective of the World Health Organization (WHO) Global Strategy for Women's, Children's and Adolescent's Health 2016-2030 (1) and of Health 2020, the European strategic framework setting the policy directions for the 53 Member States in the WHO European Region (2). Quality in health care is recognized as essential for the health and well-being of the population, and as a basic aspect of human rights (3-5).

Among the different strategies aiming at improving quality of care at maternity services, the facility-based maternal near miss cases review (NMCR) cycle was proposed by WHO in 2004 as a type of clinical audit (6-8). In respect to mortality audit, the near-miss case review has the advantage to imply less legal issues, and is therefore perceived as more acceptable by staff. Near-miss cases are defined as a woman who nearly died but survived a complication that occurred during pregnancy, childbirth or within six weeks after pregnancy (9). In the facility-based NMCR all hospital staff involved in the management of the chosen near-miss case - including obstetricians, midwives, nurses and ancillary staff - get together to discuss and evaluate the care provided against national evidence-based guidelines, local protocols and standards of care. The aim of the case review is to critically discuss local management, procedures and attitudes, and to identify areas that can be further improved (9). Actions to improve quality of maternal health care are proposed and agreed by hospital staff, and subsequently monitored to check their implementation, as for a continuous quality improvement process (9). One of the key characteristics of this

1  
2 method is the bottom-up approach, aiming at facilitating local ownership of the process,  
3  
4 commitment in implementing the proposed recommendations, and team-building.  
5  
6 Currently, the review of severe maternal morbidity cases (“near-miss” events) is  
7  
8 recommended by WHO as a key action to eliminate avoidable maternal and perinatal  
9  
10 mortality and morbidity and improve the quality of care (10).  
11  
12  
13  
14  
15

16 While in some countries within the WHO European Region (such as UK, Norway, the  
17  
18 Netherlands) the practice of reviewing maternal near miss cases was introduced by the  
19  
20 government or by professional associations, in several other countries (most often middle-  
21  
22 income countries) its implementation was assisted by the WHO and/or United Nation  
23  
24 Population Fund (UNFPA). In the later scenario, coverage and quality of the NMCR  
25  
26 implementation were usually discussed during workshops (11-13), but so far they have not  
27  
28 been evaluated using a systematic methodology.  
29  
30  
31  
32  
33

34 In 2015, WHO developed a checklist for assessing the quality of the implementation of the  
35  
36 NMCR cycle at hospital level through a systematic methodology (9). This study aimed at  
37  
38 evaluating the quality of the NMCR implementation in five countries of Eastern Europe and  
39  
40 central Asia, using the WHO checklist, to identify common strengths and weaknesses  
41  
42 among different settings.  
43  
44  
45  
46  
47  
48  
49

## 50 MATERIAL AND METHODS

### 51 52 53 54 Population and setting



1  
2 The assessment was conducted in Armenia, Georgia, Latvia, Republic of Moldova, and  
3  
4 Uzbekistan between June 2015 and October 2016. Countries were chosen based on the  
5  
6 following criteria: i) activities planned by the Ministry of Health (MoH) included a quality  
7  
8 assessment of the NMCR; ii) there was a request for technical assistance from WHO or  
9  
10 UNFPA.  
11  
12

13  
14  
15  
16 In all of the countries the NMCR approach was introduced following the WHO  
17  
18 methodology (9). The year of NMCR introduction differed among countries (Table 1).  
19  
20

21  
22  
23  
24 The number of facilities visited in each country depended on the total number of hospitals  
25  
26 implementing the NMCR cycle: in Armenia, Georgia and Latvia all facilities implementing  
27  
28 the NMCR were visited; in Moldova and Uzbekistan, where a large number of maternity  
29  
30 units are implementing the NMCR, a sample was selected in agreement with the MoH and  
31  
32 the national NMCR coordinator/s, following a geographical criteria (i.e. so that different  
33  
34 regions were represented) and including different type of hospitals. Overall, 23 maternity  
35  
36 units were visited in the five selected countries (Table 1).  
37  
38  
39  
40  
41

#### 42 **Data collection**

43  
44  
45  
46  
47 Each facility was visited for at least the duration of a whole day by two independent  
48  
49 external experts with long term experience in NMCR implementation. The international  
50  
51 team was joined by the national assessors, experienced in NMCR implementation at local  
52  
53 level. The team was under the leadership of one international assessor (AB), who  
54  
55  
56  
57  
58  
59  
60

1 participated to all hospital visits, with the objective of ensuring standards procedures in all  
2 assessments.  
3  
4  
5

6  
7  
8  
9 The assessment was carried out using a checklist developed by WHO to evaluate the  
10 quality of the NMCR cycle at hospital level (Table S1). The checklist was developed by  
11 WHO in 2014, field-tested and optimised for use in early 2015 (9). The methodology for  
12 the quality assessment is fully described in a WHO manual (9). Briefly, the checklist  
13 includes 50 items, grouped in 11 domains. The sources of information for the assessment  
14 includes: direct observation and evaluation of one or more NMCR sessions; discussion  
15 with participants, coordinators and managers; documents from the NMCR sessions  
16 (templates and notes from the sessions); local documents (regional/local policies and  
17 guidance documents; protocols and standards for care; documents related to quality  
18 assurance, monitoring and supervision; reports on NMCR activities); national documents  
19 (national policies and guidance documents, guidelines, reports on NMCR implementation).  
20 According to the WHO methodology, using the WHO manual (9) as source of standards,  
21 each of the 50 items was scored from 0 (totally inappropriate) to 3 (appropriate) (Table  
22 S1). For each of the 11 domains the arithmetic mean among all the items in that domain  
23 was calculated.  
24  
25  
26  
27  
28  
29  
30  
31  
32  
33  
34  
35  
36  
37  
38  
39  
40  
41  
42  
43  
44  
45  
46  
47

48 In each facility, immediately after the assessment, feedbacks were discussed with the local  
49 staff and plans for improvement of the NMCR implementation were developed, using a  
50 simple matrix (Table S1).  
51  
52  
53  
54  
55

56 After completing the visits to all maternity units in the country, a national restitution  
57  
58  
59

1 workshop was organised involving representatives from the hospitals, health authorities,  
2 professional organisations and partners. During the workshop, achievements and  
3  
4 professional organisations and partners. During the workshop, achievements and  
5  
6 constraints were presented and underlying reasons were discussed. Recommendations  
7  
8 for improvement were developed and synthesised in a standard pre-defined simple matrix  
9  
10 (Table S1).  
11  
12  
13  
14  
15  
16

### 17 **Ethical considerations**

18  
19  
20  
21  
22 Activities of this observational study were initiated upon request of the MoHs and carried  
23  
24 out in close collaboration with the health authorities; ethical approval was not required.  
25  
26 Information to hospital staff was provided by MoH representatives and local authorities. All  
27  
28 people involved in the NMCR sessions were informed about the purpose of the visit and  
29  
30 oral consent from the hospital staff and local coordinators and facilitators participating to  
31  
32 the observed sessions was obtained. The review of near-miss cases was carried forward  
33  
34 anonymously, i.e. information that may have disclosed the identity of the patient, or  
35  
36 providers of care was not reported (9). This study did not aim at directly comparing  
37  
38 countries or single facilities with different background, context, and timelines of  
39  
40 implementation, therefore results of the assessment are reported in an anonymous way,  
41  
42 according to WHO methodology (9). Detailed finding of the assessment together with  
43  
44 feedback on how to improve quality of the NMCR implementation were provided to each  
45  
46 facility and to each country individually.  
47  
48  
49  
50  
51  
52  
53  
54  
55  
56

### 57 **RESULTS**

1  
2  
3  
4 The assessment pointed out that quality of the implementation of the NMCR cycle was  
5  
6 heterogeneous among different countries, as well as among different hospitals within the  
7  
8 same country. Table 2 reports the results of the summary scores, for each of the 11  
9  
10 domains of the WHO assessment checklist.  
11  
12  
13  
14

15 Overall, the first part of the audit cycle (step 1-6 in Table 2, i.e. from case identification to  
16  
17 case analysis) was on average fairly well performed in all countries (average score 2.00,  
18  
19 95%CI 1.94 to 2.06), with the exception of the domain “inclusion of users’ views” which  
20  
21 was poorly implemented in most facilities (average score 1.06, 95%CI 0.07 to 2.05). The  
22  
23 second part of the audit cycle (step 7-10), which involves developing appropriate  
24  
25 recommendations, implementation of the recommendations, follow up, documentation and  
26  
27 dissemination of results within the facility and the country, was on average poorly  
28  
29 performed in all countries (average score 1.20, 95%CI 0.93 to 1.46). In particular, the  
30  
31 domain 11 “ensuring quality in the NMCR cycle”, which implies a process of periodical  
32  
33 quality assessment, development of recommendation for quality improvement, and related  
34  
35 actions, was overall substandard (average score 0.66, 95%CI 0.11 to 1.22), with the  
36  
37 exception of country E, where regular monitoring and supervision was carried out by a  
38  
39 team that included national and international members.  
40  
41  
42  
43  
44  
45  
46  
47

48 In each country it was possible to identify at least one “champion” facility, where quality of  
49  
50 the NMCR cycle had only minor deficiencies (A-H3, B-H4, C-H1, D-H3, EH1 and H2). On  
51  
52 the other hand, in a few facilities (A-H2, B-H1 and H3, CH6) most of the areas assessed  
53  
54 were judged as “totally inappropriate”.  
55  
56  
57  
58  
59  
60

1  
2  
3  
4 In some facilities examples of good practices were also observed for domains that were on  
5  
6 average implemented on a substandard level at a country-level. For examples, despite  
7  
8 inclusion of users views was substandard in most facilities in countries B and D (average  
9  
10 scores 1.11, 95%CI 0 to 2.22 and 0.61, 95%CI 0 to 1.48 respectively) single facilities  
11  
12 reached good scores (B-H4 had a score of 3 and D-H3 had a score of 2), being able to  
13  
14 regularly interview women and incorporating their views in the development of  
15  
16 recommendations to improve hospital care (Table 2).  
17  
18  
19  
20  
21

22 On average, quality of the implementation of NMCR was on a higher level in Country E,  
23  
24 where evaluation scores pointed out that there were only few weaknesses in  
25  
26 implementation compared to other countries (average score 2.12, 95%CI 1.84 to 2.39).  
27  
28  
29  
30  
31

32 Table 3 summarises main common strengths and weaknesses in the quality of the NMCR  
33  
34 implementation, as divided in three categories: (i) those mostly related to technical  
35  
36 aspects, (ii) those predominantly of organisational nature, and (iii) those related to the  
37  
38 attitude toward the NMCR. The main technical strength was that, beside the existence of  
39  
40 appropriate technical skills in the methodology, most facilities developed several  
41  
42 recommendations that were achievable, realistic, time-bound- and with a potential impact  
43  
44 on the quality of care. Although recommendations were not always well documented (thus  
45  
46 resulting in low scores under domain 10,) gaps in reporting results did not always indicated  
47  
48 actual gaps in implementation, and in many cases several recommendations were actually  
49  
50 implemented. This was a common observation in country B, where recommendations  
51  
52 were poorly recorded, but several actions to improve quality of care -such as setting up  
53  
54  
55  
56  
57  
58  
59  
60

1  
2 emergency kits and related protocols, and introducing the Modified Obstetric Early  
3  
4 Warning Score (MEOWS) chart (14)- were actually implemented. Among strength in  
5  
6 organisational aspects, the most important was that NMCR were regularly held, and  
7  
8 staffing at all levels, including midwives, participated. Main strengths in attitude included  
9  
10 the endorsement and application of the basic principles of the NMCR (confidentiality,  
11  
12 openness, respecting diverging opinions, avoiding blame).  
13  
14  
15

16  
17  
18 Main gaps in technical aspects were: inappropriate case reconstruction; case analysis not  
19  
20 getting to the “real point” and not using a “why but why” approach (i.e. discussion of  
21  
22 underlying causes); recommendations not being fully SMART (Specific, Measurable,  
23  
24 Achievable, Realistic, Time-bound (15). Main gaps of organisational nature were: lack of  
25  
26 continuity in the role of facilitator/coordinator; lack of proper dissemination of the results  
27  
28 (i.e. circulation of information within the facility level and at national level on how many and  
29  
30 what type of recommendations were developed); lack of follow up on previous  
31  
32 recommendations. Major gaps in adopting the background philosophy and principles of the  
33  
34 NMCR were observed in some facilities such as: lack of respect for other people’s opinion;  
35  
36 persistence of blaming and judging others rather than using the NMCR cycle to discuss  
37  
38 and improve ways of working; insufficient involvement of mid-level staff. Lack of inclusion  
39  
40 of the users’ view, which was a frequent observation, was reported to be due to the lack of  
41  
42 trained interviewers, and this was interpreted as not merely an organisational gap, but also  
43  
44 as a problem in attitude of the of the health providers, i.e. lack of understanding the  
45  
46 importance of taking into account the women’s point of view. Finally, common to most  
47  
48 facilities, there was insufficient monitoring and evaluation, and lack of a quality assurance  
49  
50  
51  
52  
53  
54  
55  
56  
57  
58  
59  
60

1  
2 mechanism. In most cases this was due to deficiencies in establishing and efficiently  
3  
4 running a NMCR coordination system at national level.  
5  
6  
7

8  
9 Recommendations developed by local stakeholders during the national restitution  
10 workshops were setting-specific. Nevertheless, there were several similarities. The most  
11 frequent/relevant recommendations developed for implementation at different levels -  
12 hospital level, national level, WHO and development partners - are reported in Table 4.  
13  
14  
15  
16  
17  
18

19  
20 Examples of the observed impact of the NMCR on quality of care at facility level are  
21 reported in Table S2. Despite progress was often poorly reported both in the hospital and  
22 in national reports, several achievements could be observed. These included improved  
23 use of national clinical guidelines, development and use of local protocols and standards  
24 of care, better availability and organisation of emergency services, improved autonomy of  
25 midwives, and positive dynamics such as improved team working.  
26  
27  
28  
29  
30  
31  
32  
33  
34  
35  
36  
37

## 38 DISCUSSION

39  
40  
41  
42 This study aimed at evaluating the quality of the NMCR at hospital level in selected  
43 countries within the WHO European Region using a standardised checklist and  
44 methodology. Overall the assessment pointed out that the practise of reviewing near-miss  
45 cases at hospital level is currently ongoing in all countries included in this study; however,  
46 both coverage and quality of the implementation of the NMCR cycle is heterogeneous.  
47  
48  
49  
50  
51  
52 Overall, while first part of the audit cycle (from case identification to case analysis) was  
53  
54 fairly well performed, with the exception of the “inclusion of users’ views”, the second part  
55  
56  
57  
58  
59  
60

1  
2 of the audit cycle (developing recommendations, implementing them, ensuring quality) was  
3  
4 in general poorly performed. Gaps in implementation were both of technical,  
5  
6 organisational, and attitudinal nature.  
7  
8  
9

10  
11 These findings are not entirely surprising. Previous, although less systematic, evaluations  
12  
13 in the same geographical area pointed a series of challenges (7,8,11,12) in effectively  
14  
15 implementing the review of near-miss cases at facility level. Beside technical and  
16  
17 organisational challenges, the successful implementation of clinical audits such as the  
18  
19 NMCR often calls for a major change in staff's attitude (7,8,11,12). In the country  
20  
21 assessed, especially in the Ex-Soviet countries, the successful implementation of the  
22  
23 NMCR aims at moving away from a "traditional" system of carrying forward clinical audits,  
24  
25 where blame and punishment were the routine, subjective judgment were the rule and  
26  
27 audit involved only doctors, while midwives, other mid-level staff and service users had no  
28  
29 voice (7,8,11,12). The "traditional" audit system mainly resulted in punishing single  
30  
31 individuals, rather than at looking to the health system failures and finding solutions at  
32  
33 organisational level (7,8,11,12). Changing practices involved building knowledge and skills  
34  
35 together with a drastic shift in attitude. Given these substantial constraints, the successful  
36  
37 implementation of the NMCR at least in one country (Country E) and in several champion  
38  
39 maternity units in other countries, must be seen as a positive achievement, proving that  
40  
41 NMCR can be successfully implemented in different settings.  
42  
43  
44  
45  
46  
47  
48  
49  
50

51  
52 This paper reports the quality of the NMCR implementation in middle-income countries  
53  
54 (Armenia, Moldova, Uzbekistan are lower middle income countries, Georgia is an upper  
55  
56 middle income countries), where the NMCR was carried forward with relatively limited  
57  
58  
59  
60



1  
2 resources. Findings of this assessment cannot be generalised to other high-income  
3  
4 countries of the WHO European region, such as UK, Norway, the Netherlands, where the  
5  
6 practice of reviewing maternal near miss cases has been institutionalised, with major  
7  
8 efforts on creating also coordinating mechanisms (16-18). However, it must be  
9  
10 acknowledged that the review of near miss cases at facility level is still not a routine  
11  
12 practice in many European countries. We were unable to identify any study reporting on a  
13  
14 standard-based assessment of the quality of the NMCR from any country of the WHO  
15  
16 European region.  
17  
18  
19  
20  
21  
22

23 Interestingly, findings of this study suggest that quality of the implementation of the NMCR  
24  
25 cycle is not strictly associated to the duration of the implementation. However, it is also  
26  
27 true that adequate time is needed for implementation, and completing a pilot phase in a  
28  
29 country cannot take less than 18-24 months from the first technical workshop. In this  
30  
31 regard, it must be acknowledged that country B started piloting just six months before the  
32  
33 quality assessment; therefore, observed results in this country can be interpreted as  
34  
35 satisfactory given the short time frame.  
36  
37  
38  
39  
40  
41

42 The high heterogeneity in results within the same country (such as in the case of country  
43  
44 A, B, and D) suggests that quality of the NMCR implementation depends, to a large extent,  
45  
46 from hospital factors, including staff's commitment, managerial support, and local  
47  
48 coordination. These results are in line with a systematic review on facilitators and barriers  
49  
50 to effective implementation of NMCR cycle, pointing out that hospital factors (good  
51  
52 leadership), together with a system of coordination (which often includes external support),  
53  
54 are key enablers for effective NMCR implementation (19).  
55  
56  
57  
58  
59  
60

1  
2  
3  
4 This assessment pointed out that, despite WHO recommends conducting an interview with  
5  
6 the women/her family for each near miss case, inclusion of women's view was still  
7  
8 substandard in many of the assessed facilities. However, some facilities (B-H4, D-H3)  
9  
10 reached good scores even when this domain was problematic at a country level (Table 2).  
11  
12 In the WHO framework, "experience of care" is one of the two key components of quality of  
13  
14 maternal and newborn health care, along with "provision of care" (1,2). The views of  
15  
16 women and their families can provide relevant information on aspects related to case  
17  
18 management, including important details on what happened, such as organizational issues  
19  
20 communication issues, and respectful care. In a study in Moldova it was observed that the  
21  
22 implementation of NMCR improved attitude towards patients (20), while in Kazakhstan it  
23  
24 successfully improved patients' satisfaction (21,22).  
25  
26  
27  
28  
29  
30  
31

32 This study points out that quality in the reporting on the NMCR activities was overall low.  
33  
34 The WHO manual now provides a series of templates to facilitate a uniform reporting (9).  
35  
36 Sustained monitoring and evaluation based on appropriate reporting, as well as periodical  
37  
38 quality assessments should be part of a strategy to achieve quality in the NMCR  
39  
40 implementation.  
41  
42  
43  
44  
45

46 This paper has the merit of reporting the actual state of implementation of NMCR in a real  
47  
48 setting and not in a study setting (where usually a limited number of facilities is involved for  
49  
50 a limited period of time, with dedicated human and financial resources). Another strength  
51  
52 of the study is that the evaluation was carried out in a systematic way using a predefined  
53  
54 standardised tool and methodology, aiming at evaluating all key aspects that contribute to  
55  
56  
57  
58  
59  
60

1  
2 overall NMCR quality (table S1) (9). To our knowledge, no other previous similar  
3  
4 systematic evaluations have been performed.  
5  
6  
7

8  
9 We acknowledge that the scoring system utilised by the checklist may be open to some  
10  
11 subjectivity. However, this scoring system is similar to others extensively used by WHO in  
12  
13 the last 15 years for systematic, standard based, quality assessments, and it proved to be  
14  
15 able to capture key elements of quality of the implementation in both pragmatic and  
16  
17 research settings (23-27). No other validated tool or scoring system exist to assess quality  
18  
19 of the NMCR. The checklist and its score system were field tested before use, until when  
20  
21 they were considered satisfactory covering all key aspects of quality of NMCR (9). The  
22  
23 score is attributed by a team of experts, thus reducing subjectivity of the single individual in  
24  
25 the evaluation (9).  
26  
27  
28  
29  
30

31 As a second limitation we acknowledge that in two out of the total five countries (Moldova  
32  
33 and Uzbekistan), the sample was selected based on MoH indications (non-probability  
34  
35 sampling), and one cannot exclude a selection bias towards the better performing  
36  
37 institutions. However, we emphasize that the main purpose of the assessment was to  
38  
39 create an opportunity at national level do discuss quality of the NMCR, and to develop  
40  
41 recommendations for improvement. Subsequent assessments could extend the evaluation  
42  
43 to other facilities and monitor progress in specific areas.  
44  
45  
46  
47  
48  
49  
50

51 Based on the results of this study, in the future more efforts should be put in evaluating the  
52  
53 quality of the implementation of NMCR on a regular basis. More implementation studies  
54  
55  
56  
57  
58  
59  
60

1  
2 should explore interventions aiming at improving quality of the NMCR implementation in  
3  
4 different settings.  
5  
6  
7

8 The objective of this study was not evaluating the impact of the implementation of the  
9  
10 NMCR, but rather the quality of the process. Nevertheless, several achievements could be  
11  
12 observed (Table S2), despite this type of information was not consistently available. These  
13  
14 results are in line with other studies (28-41) and a systematic review reporting that NMCR  
15  
16 is an effective strategy in improving quality of care when measured against predefined  
17  
18 standards and it may even significantly reduce maternal mortality in high burden countries  
19  
20  
21  
22  
23 (42).  
24  
25  
26

## 27 **Conclusions**

28  
29  
30  
31 Ensuring high quality in the implementation of the NMCR may be difficult in countries of  
32  
33 Eastern Europe and central Asia, but achievable. In the future more efforts should be put  
34  
35 in evaluating the quality of the implementation of NMCR on a regular basis, capitalising  
36  
37 from these lessons, and preventing and mitigating common barriers that hamper  
38  
39 successful implementation. The availability of a new manual on how to implement and to  
40  
41 monitor the NMCR at facility level, and of a standard methodology for assessing quality of  
42  
43 the NMCR, as well as templates for reporting (9) may facilitate this process.  
44  
45  
46  
47  
48  
49

## 50 **Acknowledgments**

51 We would like to thanks the local NMCR country coordinators, the hospitals staff, WHO  
52  
53 regional and country staff and development partners who collaborated in the organisation  
54  
55 of the assessment missions. We thank Sonia Richardson for language revision in this  
56  
57 paper.  
58  
59  
60

## **Funding**

The assessment was supported by WHO Regional Office for Europe and UNFPA Regional Office for Eastern Europe and Central Asia

## **Author contributions**

AB and ML conceived the study, analysed the data and wrote the first draft of the paper  
AB, SH, HK, SB, SI, MJ, ID, GM, GL collected data and contribute to the final draft of the paper

GL and GM contributed by procuring funds

All author contributed to the final version of the paper.

## **Data Sharing statement**

Additional details on the country assessments can be obtain from the first author

## REFERENCES

1. World Health Organization. Global Strategy for Women's, Children's and Adolescent's Health 2016-2030 Available at <http://www.who.int/life-course/partners/global-strategy/global-strategy-2016-2030/en/> (accessed Dec 15, 2016)
2. World Health Organization (WHO), Regional Office for Europe. Health 2020: the European policy for health and well-being. WHO Regional Office for Europe, Copenhagen 2013. Available at <http://www.euro.who.int/en/health-topics/health-policy/health-2020-the-european-policy-for-health-and-well-being/publications/2013/health-2020-a-european-policy-framework-and-strategy-for-the-21st-century> (accessed Dec 15, 2016)
3. World Health Organization (WHO). The prevention and elimination of disrespect and abuse during facility-based childbirth. World Health Organization, Geneva, 2014. Available at [http://apps.who.int/iris/bitstream/10665/134588/1/WHO\\_RHR\\_14.23\\_eng.pdf?ua=1&ua=1](http://apps.who.int/iris/bitstream/10665/134588/1/WHO_RHR_14.23_eng.pdf?ua=1&ua=1) (accessed Sept 15, 2016)
4. Tunçalp O, Were WM, MacLennan C, Oladapo OT, Gülmezoglu AM, Bahl R, Daelmans B, Mathai M, Say L, Kristensen F, Temmerman M, Bustreo F. Quality of care for pregnant women and newborns—the WHO vision. *BJOG*. 2015 Jul;122(8):1045-9.
5. World Health Organization, Standards for improving quality of maternal and newborn care in health facilities. Geneva: World Health Organization, 2016. Available at [http://www.who.int/maternal\\_child\\_adolescent/documents/improving-maternal-newborn-care-quality/en/](http://www.who.int/maternal_child_adolescent/documents/improving-maternal-newborn-care-quality/en/) (accessed Sept 15, 2016)
6. World Health Organization. Beyond the numbers: Reviewing maternal deaths and complications to make pregnancy safer. World Health Organization, Geneva, 2004. Available at <http://whqlibdoc.who.int/publications/2004/9241591838.pdf?ua=1> (accessed Sept 15, 2016)
7. Bacci A, Lewis G, Baltag V, Betrán AP. The introduction of confidential enquiries into maternal deaths and near-miss case reviews in the WHO European Region. *Reprod Health Matters*. 2007 Nov;15(30):145-52.
8. Bacci A. Implementing “Beyond The Numbers” across the WHO European Region: steps adopted, challenges, successes and current status. *Entre Nous* 2010; 70; 6-7.
9. World Health Organization. Regional Office for Europe. Conducting a maternal near-miss case review cycle at the hospital level” manual with practical tools. Available at <http://www.euro.who.int/en/health-topics/Life-stages/maternal-and-newborn-health/publications/2016/conducting-a-maternal-near-miss-case-review-cycle-at-hospital-level-2016> (accessed November 29, 2016)
10. World Health Organization Regional Office for Europe. Action plan for sexual and reproductive health: towards achieving the 2030 Agenda for Sustainable Development in Europe – leaving no one behind. Copenhagen: World Health Organization Regional Office for Europe; 2016. Available at [http://www.euro.who.int/\\_\\_data/assets/pdf\\_file/0018/314532/66wd13e\\_SRHActionPlan\\_160524.pdf](http://www.euro.who.int/__data/assets/pdf_file/0018/314532/66wd13e_SRHActionPlan_160524.pdf) (accessed Nov 15, 2016)

- 1  
2  
3  
4  
5  
6  
7  
8  
9  
10  
11  
12  
13  
14  
15  
16  
17  
18  
19  
20  
21  
22  
23  
24  
25  
26  
27  
28  
29  
30  
31  
32  
33  
34  
35  
36  
37  
38  
39  
40  
41  
42  
43  
44  
45  
46  
47  
48  
49  
50  
51  
52  
53  
54  
55  
56  
57  
58  
59  
60
11. World Health Organization. Regional Office for Europe. Multi-Country review meeting on maternal mortality and morbidity audit "Beyond the Numbers", Report of a WHO meeting, Charvak, Uzbekistan 14–17 June 2010. Copenhagen, WHO Regional Office for Europe, 2010. Available at <http://www.euro.who.int/en/health-topics/Life-stages/maternal-and-newborn-health/publications/2010/multi-country-review-meeting-on-maternal-mortality-and-morbidity-audit-beyond-the-numbers,-report-of-a-who-meeting,-charvak,-uzbekistan-1417-june-2010> (accessed September 8, 2016).
12. World Health Organization. Regional Office for Europe. The impact of implementation of 'Beyond the numbers' approach in improving maternal and perinatal health. 29-30 April 2014, Bishkek, Kyrgyzstan. Copenhagen, WHO Regional Office for Europe, 2014. Available at <http://www.euro.who.int/en/media-centre/events/events/2014/04/the-impact-of-implementation-of-beyond-the-numbers-approach-in-improving-maternal-and-perinatal-health> (accessed September 8, 2016).
13. WHO Regional Office for Europe Making Pregnancy Safer in Uzbekistan. Maternal mortality and morbidity audit Activities Report 2002-2008. Available at [http://www.euro.who.int/\\_data/assets/pdf\\_file/0004/98797/MPS\\_UZB.pdf](http://www.euro.who.int/_data/assets/pdf_file/0004/98797/MPS_UZB.pdf) (accessed september 8, 2016)
14. The Royal Free Hospital Nhs Trust Maternity Clinical Guidelines. MEOWS Guidance in Maternity. Available at [http://www.oaa-anaes.ac.uk/assets/\\_managed/editor/file/guidelines/meows/royal%20free%20meows%20guideline%20-%20mcglennan\\_.pdf](http://www.oaa-anaes.ac.uk/assets/_managed/editor/file/guidelines/meows/royal%20free%20meows%20guideline%20-%20mcglennan_.pdf) (accessed November 29, 2016)
15. Doran, G. T. (1981). "There's a S.M.A.R.T. way to write management's goals and objectives". *Management Review (AMA FORUM)* 70 (11): 35–36
16. Knight M, Lewis G, Acosta CD, Kurinczuk JJ. Maternal near-miss case reviews: the UK approach. *BJOG*. 2014 Sep;121 Suppl 4:112-6.
17. Marr L, Lennox C, McFadyen AK. Quantifying severe maternal morbidity in Scotland: a continuous audit since 2003. *Curr Opin Anaesthesiol*. 2014 Jun;27(3):275-81.
18. Knight M; INOSS. The International Network of Obstetric Survey Systems (INOSS): benefits of multi-country studies of severe and uncommon maternal morbidities. *Acta Obstet Gynecol Scand*. 2014 Feb;93(2):127-31.
19. Lazzarini M, Ciuch M, Covi B, Rusconi S, Bacci A. Facilitators and barriers to the effective implementation of the facility based maternal near-miss case reviews in low and middle income countries: systematic review (submitted for publication to BMJ Open in October 2017)
20. Baltag V, Filippi V, Bacci A. Putting theory into practice: the introduction of obstetric near-miss case reviews in the Republic of Moldova. *Int J Qual Health Care*. 2012 Apr;24(2):182-8
21. Sukhanberdiyev K, Ayazbekov A, Issina A, Abuova G, Hodorocea S, Bacci A. Initial experience of Near Miss Case Review: improving the management of haemorrhage. *Entre Nous* 2011: 74; 18-19.
22. Hodorocea S. Piloting near miss case reviews in Kazakhstan: improving quality of maternal care. *Entre Nous* 2010: 70; 28-29.

- 1
  - 2
  - 3
  - 4
  - 5
  - 6
  - 7
  - 8
  - 9
  - 10
  - 11
  - 12
  - 13
  - 14
  - 15
  - 16
  - 17
  - 18
  - 19
  - 20
  - 21
  - 22
  - 23
  - 24
  - 25
  - 26
  - 27
  - 28
  - 29
  - 30
  - 31
  - 32
  - 33
  - 34
  - 35
  - 36
  - 37
  - 38
  - 39
  - 40
  - 41
  - 42
  - 43
  - 44
  - 45
  - 46
  - 47
  - 48
  - 49
  - 50
  - 51
  - 52
  - 53
  - 54
  - 55
  - 56
  - 57
  - 58
  - 59
  - 60
23. Duke T, Keshishyan E, Kuttumuratova A, Ostergren M, Ryumina I, Stasii E, Weber MW, Tamburlini G. Quality of hospital care for children in Kazakhstan, Republic of Moldova, and Russia: systematic observational assessment. *Lancet*. 2006 Mar 18;367(9514):919-25.
24. Lazzerini M, Shukurova V, Davletbaeva M, Monolbaev K, Kulichenko T, Akoev Y, Bakradze M, Margieva T, Mityushino I, Namazova-Baranova L, Boronbayeva E, Kuttumuratova A, Weber MW, Tamburlini G. Improving the quality of hospital care for children by supportive supervision: a cluster randomized trial, Kyrgyzstan. *Bull World Health Organ*. 2017 Jun 1;95(6):397-407
25. Tamburlini G, Yadgarova K, Kamilov A, Bacci A; Maternal and Neonatal Care Quality Improvement Working Group. Improving the quality of maternal and neonatal care: the role of standard based participatory assessments. *PLoS One*. 2013 Oct 22;8(10):e78282.
26. Tamburlini G, Siupsinskas G, Bacci A; Maternal and Neonatal Care Quality Assessment Working Group.. Quality of maternal and neonatal care in Albania, Turkmenistan and Kazakhstan: a systematic, standard-based, participatory assessment. *PLoS One*. 2011;6(12):e28763.
27. Campbell H, Duke T, Weber M, English M, Carai S, Tamburlini G; Pediatric Hospital Improvement Group.. Global initiatives for improving hospital care for children: state of the art and future prospects. *Pediatrics*. 2008 Apr;121(4):e984-92.
28. Kayiga H, Ajeani J, Kiondo P, Kaye DK. Improving the quality of obstetric care for women with obstructed labour in the national referral hospital in Uganda: lessons learnt from criteria based audit. *BMC Pregnancy Childbirth*. 2016 Jul 11;16(1):152.
29. Mohd Azri MS, Edahayati AT, Kunasegaran K. Audit on management of eclampsia at Sultan Abdul Halim Hospital. *Med J Malaysia*. 2015 Jun;70(3):142-7.
30. Gebrehiwot Y, Tewolde BT. Improving maternity care in Ethiopia through facility based review of maternal deaths and near misses. *Int J Gynaecol Obstet*. 2014 Oct;127 Suppl 1:S29-34.
31. Luz AG, Osis MJ, Ribeiro M, Cecatti JG, Amaral E. Impact of a nationwide study for surveillance of maternal near-miss on the quality of care provided by participating centers: a quantitative and qualitative approach. *BMC Pregnancy Childbirth*. 2014 Apr 1;14:122
32. Kidanto HL, Wangwe P, Kilewo CD, Nystrom L, Lindmark G. Improved quality of management of eclampsia patients through criteria based audit at Muhimbili National Hospital, Dar es Salaam, Tanzania. Bridging the quality gap. *BMC Pregnancy Childbirth*. 2012 Nov 21;12:134.
33. van den Akker T, van Rhenen J, Mwangomba B, Lommerse K, Vinkhumbo S, van Roosmalen J. Reduction of severe acute maternal morbidity and maternal mortality in Thyolo District, Malawi: the impact of obstetric audit. *PLoS One*. 2011;6(6):e20776. doi: 10.1371/journal.pone.0020776. Epub 2011 Jun 3.
34. Bailey PE, Binh HT, Bang HT. Promoting accountability in obstetric care: use of criteria-based audit in Viet Nam. *Glob Public Health*. 2010;5(1):62-74.
35. van den Akker T, Mwangomba B, Irlam J, van Roosmalen J. Using audits to reduce the incidence of uterine rupture in a Malawian district hospital. *Int J Gynaecol Obstet*. 2009 Dec;107(3):289-94. doi: 10.1016/j.ijgo.2009.09.005. Epub 2009 Oct 28.
36. Hunyinbo KI, Fawole AO, Sotiloye OS, Otolorin EO. Evaluation of criteria-based clinical audit in improving quality of obstetric care in a developing country hospital. *Afr J Reprod Health*. 2008 Dec;12(3):59-70



- 1  
2  
3  
4  
5  
6  
7  
8  
9  
10  
11  
12  
13  
14  
15  
16  
17  
18  
19  
20  
21  
22  
23  
24  
25  
26  
27  
28  
29  
30  
31  
32  
33  
34  
35  
36  
37  
38  
39  
40  
41  
42  
43  
44  
45  
46  
47  
48  
49  
50  
51  
52  
53  
54  
55  
56  
57  
58  
59  
60
37. Kongnyuy EJ, Leigh B, van den Broek N. Effect of audit and feedback on the availability, utilisation and quality of emergency obstetric care in three districts in Malawi. *Women Birth*. 2008 Dec;21(4):149-55.
  38. Kongnyuy EJ, Mlava G, van den Broek N. Criteria-based audit to improve a district referral system in Malawi: a pilot study. *BMC Health Serv Res*. 2008 Sep 22;8:190.
  39. Müffler N, Trabelssi M, De Brouwere V. Scaling up clinical audits of obstetric cases in Morocco. *Tropical Medicine & International Health* 2007. 12(10), 1248-1257
  40. Weeks AD, Alia G, Ononge S, Otolorin EO, Mirembe FM. A criteria-based audit of the management of severe pre-eclampsia in Kampala, Uganda. *Int J Gynaecol Obstet*. 2005 Dec;91(3):292-7; discussion 283-4.
  41. Wagaarachchi PT, Graham WJ, Penney GC, McCaw-Binns A, Yeboah Antwi K, Hall MH. Holding up a mirror: changing obstetric practice through criterion-based clinical audit in developing countries. *Int J Gynaecol Obstet*. 2001 Aug;74(2):119-30
  42. Lazzerini M, Richardson S, Ciardelli S, Erenbourg A. Effectiveness of the facility based maternal near-miss case reviews in improving maternal and newborn quality of care in low and middle income countries: systematic review (submitted for publication to BMJ Open in September 2017)

**Table 1. Characteristics of the countries and of the maternity units assessed**

|                                                                | Armenia                  | Georgia                  | Latvia                    | Moldova                   | Uzbekistan               |
|----------------------------------------------------------------|--------------------------|--------------------------|---------------------------|---------------------------|--------------------------|
| World Bank Classification <sup>1</sup>                         | Lower middle income      | Upper Middle Income      | High income               | Lower middle income       | Lower middle income      |
| Population (thousands), total*                                 | 2969                     | 4358                     | 2060                      | 3514                      | 28541                    |
| GNI per capita, PPP US\$*                                      | 6990                     | 3280                     | 21020                     | 3690                      | 1720                     |
| Maternal mortality ratio, adjusted*                            | 30                       | 67                       | 34                        | 41                        | 28                       |
| Neonatal mortality rate <sup>2</sup>                           | 10                       | 15                       | 5                         | 9                         | 14                       |
| Institutional deliveries as % of total deliveries <sup>2</sup> | 99.4                     | 98.3                     | NA                        | 99.4                      | 97.3                     |
| National introductory workshop on NMCR <sup>3</sup>            | 2007                     |                          | 2012                      | 2005                      | 2005                     |
| First national technical workshop on NMCR <sup>3</sup>         | 2009                     | 2015                     | 2013                      | 2005                      | 2007                     |
| Number of hospital implementing NMCR <sup>3</sup>              | 3                        | 6                        | 2                         | 13                        | 62                       |
| Number of hospital assessed                                    | 3                        | 6                        | 2                         | 6                         | 6                        |
| Type of hospitals                                              | 1 regional<br>2 district | 2 regional<br>4 district | 1 regional,<br>1 district | 2 regional,<br>4 district | 3 regional<br>3 district |
| Number of births/year in the hospital assessed **              | 6125                     | 8570                     | 8152                      | 13311                     | 23309                    |

<sup>1</sup> Source: The World Bank, Country and Lending Groups. (2014) Historical classification. Available: <https://datahelpdesk.worldbank.org/knowledgebase/articles/906519> (Accessed 9 March 2017).

<sup>2</sup> Source: UNICEF Country statistics [http://www.unicef.org/statistics/index\\_countrystats.html](http://www.unicef.org/statistics/index_countrystats.html) (accessed Dec 7, 2016)

<sup>3</sup> Source: WHO mission reports

**Table 2. Summary scores**

|                                         | A   |     |     | B   |     |     |     |     |     | C   |     | D   |     |     |     |     |     | E   |     |     |     |     |     |
|-----------------------------------------|-----|-----|-----|-----|-----|-----|-----|-----|-----|-----|-----|-----|-----|-----|-----|-----|-----|-----|-----|-----|-----|-----|-----|
|                                         | H1  | H2  | H3  | H1  | H2  | H3  | H4  | H5  | H6  | H1  | H2  | H1  | H2  | H3  | H4  | H5  | H6  | H1  | H2  | H3  | H4  | H5  | H6  |
| 1. Internal organisation                | 1   | 1   | 2.5 | 1   | 2.1 | 0.8 | 2.8 | 2.3 | 1.9 | 3   | 2   | 1.7 | 1.9 | 1.9 | 1.6 | 2.5 | 0.5 | 2.9 | 2.6 | 2.7 | 2.3 | 2.7 | 2.3 |
| 2. Case identification                  | 2.3 | 1   | 1.5 | 2   | 3   | 2   | 3   | 3   | 3   | 3   | 2.3 | 2.2 | 2.5 | 2.8 | 3   | 2   | 2.1 | 3   | 3   | 3   | 3   | 0.7 | 3   |
| 3. Respect of ground rules              | 1.5 | 1.5 | 2.5 | 1   | 2   | 1   | 3   | 3   | 2   | 3   | 3   | 2   | 1.5 | 1   | 1.5 | 2   | 1   | 3   | 3   | 3   | 3   | 3   | 3   |
| 4. Case presentation                    | 1.6 | 1.4 | 2   | 0.3 | 2   | 0.7 | 2.3 | 2   | 0.7 | 2.5 | 3   | 1.8 | 0.8 | 2.5 | 1.7 | 2.3 | 1.2 | 2.3 | 1.7 | 1.3 | 1   | 2   | 2   |
| 5. Inclusion of users views             | 0   | 0   | 0   | 0.3 | 1.7 | 0   | 3   | 1.2 | 0.5 | 2.5 | 1.3 | 0.3 | 0   | 2   | 0   | 1.4 | 0   | 1.8 | 2.6 | 2   | 1.4 | 1.2 | 1.2 |
| 6. Case analysis                        | 1.5 | 1   | 2.5 | 0.1 | 1.4 | 0.3 | 2   | 1.6 | 1.2 | 2.1 | 2.6 | 2.2 | 0.9 | 2   | 1.4 | 1.3 | 0.7 | 2.5 | 2.8 | 1.7 | 1   | 2.4 | 1.3 |
| 7. Development of recommendations       | 0.3 | 1   | 2   | 0.1 | 1.1 | 0   | 2   | 1.8 | 1.7 | 1.8 | 2.6 | 1.8 | 0.1 | 2.3 | 1   | 1.9 | 0.4 | 3   | 2.6 | 1.7 | 1   | 2.3 | 1.3 |
| 8. Implementation of recommendations    | 0   | 0.5 | 2   | 0   | 0   | 0   | 1   | 1.7 | 2   | 2   | 1.3 | 0.8 | 0   | 3   | 0.8 | 2   | 0.5 | 3   | 2.5 | 1.5 | 2.5 | 3   | 3   |
| 9. Follow up                            | 0   | 0   | 1.5 | 0   | 0   | 0   | 0   | 0   | 3   | 2   | 2.5 | 0   | 0   | 3   | 0   | 1.6 | 1.3 | 2.8 | 1.5 | 1.5 | 1.5 | 2   | 1.5 |
| 10. Documentation and results diffusion | 0.3 | 0.3 | 2   | 0.5 | 1   | 0.5 | 2.5 | 1   | 2   | 1.7 | 1   | 0.8 | 0.6 | 1.5 | 1.1 | 0.6 | 0.3 | 1.8 | 2   | 2.5 | 2   | 2.7 | 1   |
| 11. Ensuring quality in the NMCR        | 0   | 0   | 0   | NA  | NA  | NA  | NA  | NA  | NA  | 1   | 1   | 0   | 0   | 0   | 0   | 1   | 0.3 | 1.5 | 1.7 | 1.2 | 1.2 | 1.2 | 1.2 |

NA= in country B piloting started only six months before the quality assessment; for this reason the domain 11 was considered not applicable

**Colour legend**

RED= scores between 0.0 to 0.9

YELLOW= scores between 1.0 at 1.9

GREEN= scores between 2.0 at 3.0

**Table 3. Strengths and weaknesses observed in the quality of the NMCR implementation**

|                     | <b>STRENGTHS</b>                                                                                                                                                                                                                                                                                                                                                                                                                                                                                                                                                                                                                                                                                                   | <b>WEAKNESSES</b>                                                                                                                                                                                                                                                                                                                                                                                                                                                                                                                                                                                                                                                                                                                                                                                                            |
|---------------------|--------------------------------------------------------------------------------------------------------------------------------------------------------------------------------------------------------------------------------------------------------------------------------------------------------------------------------------------------------------------------------------------------------------------------------------------------------------------------------------------------------------------------------------------------------------------------------------------------------------------------------------------------------------------------------------------------------------------|------------------------------------------------------------------------------------------------------------------------------------------------------------------------------------------------------------------------------------------------------------------------------------------------------------------------------------------------------------------------------------------------------------------------------------------------------------------------------------------------------------------------------------------------------------------------------------------------------------------------------------------------------------------------------------------------------------------------------------------------------------------------------------------------------------------------------|
| <b>TECHNICAL</b>    | <p>In all countries:</p> <ul style="list-style-type: none"> <li>▪ Technical skills on performing NMCR were on average fair</li> <li>▪ Local protocols were on average present and used</li> <li>▪ Recommendations were usually developed, with several SMART characteristics (Achievable, Realistic, Time-bound)</li> </ul> <p>Especially in Country E:</p> <ul style="list-style-type: none"> <li>▪ Most maternity teams were able to analyze efficiently a NM case, and to develop relevant recommendations to improve quality and organization of care, and follow-up their implementation.</li> </ul>                                                                                                          | <ul style="list-style-type: none"> <li>▪ Case definition not complying with national definition</li> <li>▪ Lack of existence and use of local protocols for case analysis</li> <li>▪ Some lack of knowledge and skills in NMCR methodology</li> <li>▪ Case summary, case reconstruction door-to-door, case analysis (including getting to the real point, and what we did good, and identifications of the underlying reasons using the 'why-but-why') not performed well performed in all facilities</li> <li>▪ Recommendations not fully SMART* (often not Specific nor Measurable)</li> </ul>                                                                                                                                                                                                                             |
| <b>ORGANISATION</b> | <p>In all countries:</p> <ul style="list-style-type: none"> <li>▪ Staffing at all levels (including midwives and nurses) was involved and in some cases encouraged by facilitator to actively participate in the review process.</li> <li>▪ Session participants were mostly those involved in care provision of the case reviewed, and, generally, felt free to ask questions and express their opinions.</li> <li>▪ NMCR mostly happened on a regular basis</li> </ul> <p>Especially in Country E:</p> <ul style="list-style-type: none"> <li>▪ An excellent national plan for implementation was developed</li> <li>▪ Appropriate normative regulations were developed through regular NMCR sessions</li> </ul> | <ul style="list-style-type: none"> <li>▪ Lack of local written procedure for NMCR</li> <li>▪ Irregular meetings in some facilities</li> <li>▪ Lack of involvement of staffing who managed the case</li> <li>▪ Lack of a regional/national coordination and/or continuity in facilitator/coordinator role, and/or support from them</li> <li>▪ Lack of trained interviewers</li> <li>▪ Absence of local leaders</li> <li>▪ Lack of support from hospital manager in organisation of the NMCR and in the implementation of the recommendation</li> <li>▪ Lack of follow up on previous recommendations</li> <li>▪ Lack of production, dissemination and discussion of results of the NMCR cycle</li> <li>▪ Lack of periodical evaluations of the quality of the NMCR</li> <li>▪ When evaluations of the quality was</li> </ul> |

|                 |                                                                                                                                                                                                                                                                                                                                                                                                                                                                                                                                                                                                                                                                                                                                                                                                                                                                                                                                                                                                                                                                                                                                                                          |                                                                                                                                                                                                                                                                                                                                                                                                                                                                                                                                                                                                                                                                                                                                                                                                                                                                                                                              |
|-----------------|--------------------------------------------------------------------------------------------------------------------------------------------------------------------------------------------------------------------------------------------------------------------------------------------------------------------------------------------------------------------------------------------------------------------------------------------------------------------------------------------------------------------------------------------------------------------------------------------------------------------------------------------------------------------------------------------------------------------------------------------------------------------------------------------------------------------------------------------------------------------------------------------------------------------------------------------------------------------------------------------------------------------------------------------------------------------------------------------------------------------------------------------------------------------------|------------------------------------------------------------------------------------------------------------------------------------------------------------------------------------------------------------------------------------------------------------------------------------------------------------------------------------------------------------------------------------------------------------------------------------------------------------------------------------------------------------------------------------------------------------------------------------------------------------------------------------------------------------------------------------------------------------------------------------------------------------------------------------------------------------------------------------------------------------------------------------------------------------------------------|
|                 | <ul style="list-style-type: none"> <li>▪ By 2015, 90% of maternity facilities were trained and implementing NMCR</li> <li>Regional NMCR coordinators were established</li> <li>▪ There was sustained support from MoH; WHO and partners (also Latvia)</li> </ul>                                                                                                                                                                                                                                                                                                                                                                                                                                                                                                                                                                                                                                                                                                                                                                                                                                                                                                         | <p>performed, no mechanism ensured that resulting recommendations were taken up</p>                                                                                                                                                                                                                                                                                                                                                                                                                                                                                                                                                                                                                                                                                                                                                                                                                                          |
| <b>ATTITUDE</b> | <p>In all countries</p> <ul style="list-style-type: none"> <li>▪ Basic BTN principles were respected in most facilities, including confidentiality</li> <li>▪ Multidisciplinary approach to case reviews was evident in most facilities <ul style="list-style-type: none"> <li>▪ Managers offered substantial support to organization of NMCR sessions and implementation of recommendations.</li> </ul> </li> <li>▪ Staff found this method useful to improve quality and organization of care</li> <li>▪ Midwives role as participants, but also as coordinators and facilitators</li> </ul> <p>Interviews became a routine in most facilities (in particular in Latvia)</p> <p>Especially in Country E::</p> <ul style="list-style-type: none"> <li>▪ Facilitators succeeded to create and maintain an open and non-threatening environment during sessions; staff felt free to put forward (or ask) questions and express their opinions (also Country C)</li> <li>▪ The point of view of women was always collected and presented; some interviews were of excellent quality (also Country C)</li> <li>▪ Professionals were praised in case of good care</li> </ul> | <ul style="list-style-type: none"> <li>▪ In some cases lack of respect of other people's opinion, persistence of blaming, persistence of a wrong attitude that suggested "judging others", rather than moving towards thinking "the review is about us"</li> <li>▪ Lack of active participation in the discussion</li> <li>▪ Insufficient involvement of mid-level staffing</li> <li>▪ Lack of the interviews with woman in some facilities</li> <li>▪ Even where the interview was collected, women's view not taken into account when recommendation are implemented</li> <li>▪ Staff not always praised when quality and appropriate care given</li> <li>▪ Staff considers developing recommendations a mere formality, they were not eager to implement them, and take on the role and the responsibility to change practice.</li> <li>▪ Persistence of a system that advocates punishment in some facilities</li> </ul> |

Abbreviations: NM= near-miss; NMCR= near-miss case review; SMART= Specific, Measurable, Achievable, Realistic, Time-bound (15)

**Table 4. Recommendations made by local stakeholders on how to improve NMCR quality**

|                                           |                                                                                                                                                                                                                                                                                                                                                                                                                                                                                                                                                                                                                                                                                                                                                                                                                                                                                                                                                                                                 |
|-------------------------------------------|-------------------------------------------------------------------------------------------------------------------------------------------------------------------------------------------------------------------------------------------------------------------------------------------------------------------------------------------------------------------------------------------------------------------------------------------------------------------------------------------------------------------------------------------------------------------------------------------------------------------------------------------------------------------------------------------------------------------------------------------------------------------------------------------------------------------------------------------------------------------------------------------------------------------------------------------------------------------------------------------------|
| <b>Hospital level</b>                     | <ol style="list-style-type: none"> <li>1) Ensure managerial support for the organisation of the NMCR and for the implementation of the resulting recommendations</li> <li>2) Aim at regular sessions</li> <li>3) Ensure active participation of all staff involved in case management, including mid-level staffing</li> <li>4) Ensure that ground rules are respected</li> <li>5) Ensure that the review follows the steps suggested in the WHO manual <sup>(7)</sup></li> <li>6) Ensure that user's views are collected and taken into consideration</li> <li>7) Ensure that recommendations developed are SMART*</li> <li>8) Ensure that every session starts by following up on the previous recommendations</li> <li>9) Document the implementation of the recommendations (provide date and description)</li> <li>10) Document, analyse and disseminate results of the NMCR at hospital level, including type of recommendations developed and percentage of those implemented</li> </ol> |
| <b>National level</b>                     | <ol style="list-style-type: none"> <li>1) Set up/strengthen the national coordinating team</li> <li>2) Develop a plan for regular quality assessment and reinforcement</li> <li>3) Strengthen technical skills among staffing on the principles, methods and practices of the NMCR cycle</li> <li>4) Practical training on how to conduct interviews in order to collect women's views</li> <li>5) Support networking activities among facilities (eg exchange visits)</li> <li>6) Document, analyse and disseminate results of the NMCR at national level</li> </ol>                                                                                                                                                                                                                                                                                                                                                                                                                           |
| <b>WHO and other development partners</b> | <ol style="list-style-type: none"> <li>1) Ensure regular and timely technical support for capacity development, including developing skills for women interviews</li> <li>2) Provide support for developing legal framework and national guidance manual for NMCR</li> <li>3) Support regular monitoring of the implementation in a coordinated manner</li> <li>4) Support results dissemination and discussion</li> <li>5) Support timely quality assessments and subsequent actions for quality improvement</li> <li>6) Support networking activities among facilities /countries with the objective of improve quality of NMCR cycle</li> <li>7) Ensure continuous support for updating key national guidelines, local protocols, standards for clinical practice</li> </ol>                                                                                                                                                                                                                 |

Abbreviations: NM= near-miss; NMCR= near-miss case review; SMART= Specific, Measurable, Achievable, Realistic, Time-bound (15)

**Table S1. Checklist to assess the quality of the NMCR cycle at hospital level and matrix to develop local recommendations**

| <b>Checklist to assess the quality of the NMCR cycle at hospital level and matrix to develop local recommendations</b>                                                                                                                                                                                                                                                                                                                                                                                                                                                                                                                                                                                                                                                                                                                                                                                                                                                                                                                                                                                                                                                                                                                                                                                                               |              |                 |
|--------------------------------------------------------------------------------------------------------------------------------------------------------------------------------------------------------------------------------------------------------------------------------------------------------------------------------------------------------------------------------------------------------------------------------------------------------------------------------------------------------------------------------------------------------------------------------------------------------------------------------------------------------------------------------------------------------------------------------------------------------------------------------------------------------------------------------------------------------------------------------------------------------------------------------------------------------------------------------------------------------------------------------------------------------------------------------------------------------------------------------------------------------------------------------------------------------------------------------------------------------------------------------------------------------------------------------------|--------------|-----------------|
| Facility name _____ Date _____                                                                                                                                                                                                                                                                                                                                                                                                                                                                                                                                                                                                                                                                                                                                                                                                                                                                                                                                                                                                                                                                                                                                                                                                                                                                                                       |              |                 |
| <b>INSTRUCTIONS</b>                                                                                                                                                                                                                                                                                                                                                                                                                                                                                                                                                                                                                                                                                                                                                                                                                                                                                                                                                                                                                                                                                                                                                                                                                                                                                                                  |              |                 |
| Sources of information:                                                                                                                                                                                                                                                                                                                                                                                                                                                                                                                                                                                                                                                                                                                                                                                                                                                                                                                                                                                                                                                                                                                                                                                                                                                                                                              |              |                 |
| <ul style="list-style-type: none"> <li>▶ Direct observation and evaluation of a NMCR session</li> <li>▶ Discussion with participants</li> <li>▶ Discussion with coordinators and managers               <ul style="list-style-type: none"> <li>➢ Documents from the NMCR sessions: Records/notes of the sessions: templates, cases summaries, summary of the interviews with women and other care-takers (family, documents in support of the recommendations and their implementation, other related documentation (photo etc.)</li> </ul> </li> <li>▶ Other related documents:               <ul style="list-style-type: none"> <li>National documents                   <ul style="list-style-type: none"> <li>➢ National policies, and guidance documents</li> <li>➢ National clinical guidelines</li> <li>➢ National documents related to quality assurance, monitoring and supervision</li> <li>➢ National summary reports on NMCR implementation</li> </ul> </li> <li>Local documents                   <ul style="list-style-type: none"> <li>➢ Regional/local policies, and guidance documents</li> <li>➢ Local clinical protocols and standards for care provision</li> <li>➢ Local documents related to quality assurance, monitoring and supervision</li> <li>➢ Local summary reports</li> </ul> </li> </ul> </li> </ul> |              |                 |
| Reference: the reference for all key items is the WHO manual "How to implement the maternal Near-Miss Case Review (NMCR) cycle at hospital level"                                                                                                                                                                                                                                                                                                                                                                                                                                                                                                                                                                                                                                                                                                                                                                                                                                                                                                                                                                                                                                                                                                                                                                                    |              |                 |
| Methods of scoring:                                                                                                                                                                                                                                                                                                                                                                                                                                                                                                                                                                                                                                                                                                                                                                                                                                                                                                                                                                                                                                                                                                                                                                                                                                                                                                                  |              |                 |
| 1) Score each single item as follows: Score 0= totally inappropriate; Score 1= major problems; Score 2= some deficiencies; Score 3= appropriate.                                                                                                                                                                                                                                                                                                                                                                                                                                                                                                                                                                                                                                                                                                                                                                                                                                                                                                                                                                                                                                                                                                                                                                                     |              |                 |
| 2) In the blue row calculate the mean of the scores for each key item in the group. This is the score for that group of items.                                                                                                                                                                                                                                                                                                                                                                                                                                                                                                                                                                                                                                                                                                                                                                                                                                                                                                                                                                                                                                                                                                                                                                                                       |              |                 |
|                                                                                                                                                                                                                                                                                                                                                                                                                                                                                                                                                                                                                                                                                                                                                                                                                                                                                                                                                                                                                                                                                                                                                                                                                                                                                                                                      | <b>SCORE</b> | <b>Comments</b> |
| <b>INTERNAL ORGANISATION/PREPARATION</b>                                                                                                                                                                                                                                                                                                                                                                                                                                                                                                                                                                                                                                                                                                                                                                                                                                                                                                                                                                                                                                                                                                                                                                                                                                                                                             |              |                 |
| 1. A local written procedure to implement the NMCR cycle exists                                                                                                                                                                                                                                                                                                                                                                                                                                                                                                                                                                                                                                                                                                                                                                                                                                                                                                                                                                                                                                                                                                                                                                                                                                                                      |              |                 |
| 2. Support from management is adequate                                                                                                                                                                                                                                                                                                                                                                                                                                                                                                                                                                                                                                                                                                                                                                                                                                                                                                                                                                                                                                                                                                                                                                                                                                                                                               |              |                 |
| 3. Regular meetings are held                                                                                                                                                                                                                                                                                                                                                                                                                                                                                                                                                                                                                                                                                                                                                                                                                                                                                                                                                                                                                                                                                                                                                                                                                                                                                                         |              |                 |
| 4. Each meeting has adequate duration                                                                                                                                                                                                                                                                                                                                                                                                                                                                                                                                                                                                                                                                                                                                                                                                                                                                                                                                                                                                                                                                                                                                                                                                                                                                                                |              |                 |
| 5. All key staff involved in the NM case is invited to the session                                                                                                                                                                                                                                                                                                                                                                                                                                                                                                                                                                                                                                                                                                                                                                                                                                                                                                                                                                                                                                                                                                                                                                                                                                                                   |              |                 |
| 6. Very limited (and justified) participation of people who were not involved in the management of the NM case reviewed                                                                                                                                                                                                                                                                                                                                                                                                                                                                                                                                                                                                                                                                                                                                                                                                                                                                                                                                                                                                                                                                                                                                                                                                              |              |                 |
| 7. All material need is prepared before the session                                                                                                                                                                                                                                                                                                                                                                                                                                                                                                                                                                                                                                                                                                                                                                                                                                                                                                                                                                                                                                                                                                                                                                                                                                                                                  |              |                 |
| <b>CASE IDENTIFICATION AND SELECTION</b>                                                                                                                                                                                                                                                                                                                                                                                                                                                                                                                                                                                                                                                                                                                                                                                                                                                                                                                                                                                                                                                                                                                                                                                                                                                                                             |              |                 |
| 8. The agreed NM definition is used (same definition in all the country)                                                                                                                                                                                                                                                                                                                                                                                                                                                                                                                                                                                                                                                                                                                                                                                                                                                                                                                                                                                                                                                                                                                                                                                                                                                             |              |                 |

|                                                                                                                                                                                                                      |  |  |
|----------------------------------------------------------------------------------------------------------------------------------------------------------------------------------------------------------------------|--|--|
| 9. The NM cases are correctly identified                                                                                                                                                                             |  |  |
| 10. A NM case is appropriately selected for review among those identified                                                                                                                                            |  |  |
| <b>GROUND RULES</b>                                                                                                                                                                                                  |  |  |
| 11. Ground rules for the NMCR are respected, especially confidentiality, respect of other people's opinion and refrain from blaming single individuals                                                               |  |  |
| <b>NMCR SESSION: CASE PRESENTATION</b>                                                                                                                                                                               |  |  |
| 12. The case is appropriately summarised and presented by one participant (paper copies; flip charts; slides)                                                                                                        |  |  |
| 13. A "door to door" reconstruction, with all relevant details, is provided by all staff involved in care provision                                                                                                  |  |  |
| 14. The clinical records of the patient, whose case is reviewed, are available during the meeting, if additional information is needed                                                                               |  |  |
| <b>NMCR SESSION: INCLUSION OF USERS VIEWS</b>                                                                                                                                                                        |  |  |
| 15. The opinions of the woman ( <i>i.e. informative contents on real facts, and her perceptions and views</i> ), and if appropriate of relatives and/or friends, is collected (interview), for each NM case reviewed |  |  |
| 16. The interview(s) is/are appropriately summarised and presented                                                                                                                                                   |  |  |
| 17. The key findings from the interview ( <i>i.e. same definition as above</i> ) are appropriately taken into consideration in the case analysis                                                                     |  |  |
| 18. The key findings ( <i>i.e. same definition as above</i> ) from the interview are appropriately taken into consideration for the prioritisation and development of solution                                       |  |  |
| <b>NMCR SESSION: CASE ANALYSIS</b>                                                                                                                                                                                   |  |  |
| 19. The case-analysis is performed following a structured analytical approach                                                                                                                                        |  |  |
| 20. The case management is analysed from admission to discharge: a "door to door" approach is used                                                                                                                   |  |  |
| 21. The case is reviewed comparing actual management versus evidence (clinical guidelines, protocols and standards)                                                                                                  |  |  |
| 22. The positive aspects of care provision ("what we did good") are identified and documented                                                                                                                        |  |  |
| 23. The staff is praised for the positive aspects of care provision                                                                                                                                                  |  |  |
| 24. The critical aspects of care ("what did not go well") are appropriately identified, focusing on the most important issues ("getting to the real point")                                                          |  |  |
| 25. The real underlying reasons for substandard care ("why but why?") are identified, discussed and documented                                                                                                       |  |  |
| 26. The facilitator ensures that ground rules are respected, all steps of the session are completed, notes are taken                                                                                                 |  |  |
| 27. Staff of all types and roles (including midwives and nurses) actively and openly participate in the case analysis                                                                                                |  |  |
| 28. The results of the case-analysis are documented (using the templates)                                                                                                                                            |  |  |
| <b>NMCR SESSION: DEVELOPMENT OF RECOMMENDATIONS</b>                                                                                                                                                                  |  |  |
| 29. A list of SPECIFIC recommendations linked to the NM case is always developed, including responsible people and timelines                                                                                         |  |  |
| 30. The recommendations target the main problem (s) and the main underlying factors                                                                                                                                  |  |  |



|                                                                                                                                                                                                                                          |  |  |
|------------------------------------------------------------------------------------------------------------------------------------------------------------------------------------------------------------------------------------------|--|--|
| 31. Most of the recommendations refer to actions to be carried forward at the hospital performing the review                                                                                                                             |  |  |
| 32. The recommendations use as reference clinical guidelines, protocols and standards                                                                                                                                                    |  |  |
| 33. The recommendations are SMART (specific, measurable, achievable, realistic, time-bound)                                                                                                                                              |  |  |
| 34. The recommendations give due consideration to women's rights in hospital: effective communication, emotional support, respect and dignity                                                                                            |  |  |
| 35. The recommendations include an adequate division of tasks among hospital staff                                                                                                                                                       |  |  |
| 36. Recommendations that need action at regional/national level are effectively identified                                                                                                                                               |  |  |
| 37. The facilitator ensures that ground rules are respected, all steps of the session are completed, notes are taken                                                                                                                     |  |  |
| 38. Staff of all types and roles (including midwives and nurses) participate actively and openly                                                                                                                                         |  |  |
| 39. The recommendations are documented (using the templates)                                                                                                                                                                             |  |  |
| <b>IMPLEMENTATION OF RECCOMENDATIONS</b>                                                                                                                                                                                                 |  |  |
| 40. The agreed recommendations are implemented (at least 75%)                                                                                                                                                                            |  |  |
| 41. Managers/local health authorities actively support implementation of recommendations                                                                                                                                                 |  |  |
| 42. The implementation of recommendations is documented (using the template)                                                                                                                                                             |  |  |
| <b>NMCR SESSION: FOLLOW UP</b>                                                                                                                                                                                                           |  |  |
| 43. The NMCR session starts with a follow up of the previous session, checking that recommendations have been implemented                                                                                                                |  |  |
| 44. In case the agreed actions were not taken, reasons are discussed, and a new recommendation is developed, including responsible people and timelines                                                                                  |  |  |
| <b>DOCUMENTATIONS ON THE NMCR CYCLE AND EFFECTIVE DIFFUSION OF RESULTS - AT FACILITY LEVEL</b>                                                                                                                                           |  |  |
| 45. A folder is kept for each NM case containing all key documentation, including the follow up phase (see manual); cases are recorded in a register/log book                                                                            |  |  |
| 46. At hospital level, an appropriate summary of relevant information regarding the NMCR cycle is regularly disseminated and discussed, without compromising confidentiality, among staff, managers, and health authorities (see manual) |  |  |
| 47. Effective communication of key information is provided by hospital coordinators to national coordinator(s)                                                                                                                           |  |  |
| <b>ENSURING QUALITY IN THE NMCR CYCLE</b>                                                                                                                                                                                                |  |  |
| 48. Collaboration of the local team with the national/regional coordinator has been effective                                                                                                                                            |  |  |
| 49. Periodical evaluations of the quality of the NMCR has been planned                                                                                                                                                                   |  |  |
| 50. Previous recommendations from quality assessment has been taken into consideration and translated into actions                                                                                                                       |  |  |

1  
2  
3  
4  
5  
6  
7  
8  
9  
10  
11  
12  
13  
14  
15  
16  
17  
18  
19  
20  
21  
22  
23  
24  
25  
26  
27  
28  
29  
30  
31  
32  
33  
34  
35  
36  
37  
38  
39  
40  
41  
42  
43  
44  
45  
46  
47  
48  
49  
50  
51  
52  
53  
54  
55  
56  
57  
58  
59  
60**SUMMARY TABLE**

|                                                                             |
|-----------------------------------------------------------------------------|
| <b>MAIN STRENGTHS:</b><br><b>1.</b><br><b>2.</b><br><b>3.</b><br><b>4.</b>  |
| <b>MAIN WEAKNESSES:</b><br><b>1.</b><br><b>2.</b><br><b>3.</b><br><b>4.</b> |
| <b>COMMENTS:</b><br><b>1.</b><br><b>2.</b><br><b>3.</b><br><b>4.</b>        |

**MATRIX. Recommendations for improving the quality of the NMCR cycle at hospital level (expand as needed)**

| Priority areas that need to be improved | Action agreed | Responsible person | Timeline |
|-----------------------------------------|---------------|--------------------|----------|
|                                         |               |                    |          |
|                                         |               |                    |          |
|                                         |               |                    |          |
|                                         |               |                    |          |
|                                         |               |                    |          |
|                                         |               |                    |          |
|                                         |               |                    |          |
|                                         |               |                    |          |

**Table S2. Reported impact of the NMCR on quality of care at facility level**

- Use of national clinical guidelines
- Development and use of protocols at facility level (for doctors and for midwives) for obstetric complications (eg post-partum haemorrhages, eclampsia, sepsis)
- Development and implementation of standards of care
- Development of capacities among staff of all levels (doctors, midwives, nurses) to critically analyse cases identifying real underlying reasons for near-miss (eg lack of organisation or lack of communication), comparing management to guidelines, protocols and standards of care, and to successfully carry forward a self-assessment
- Improved autonomy of mid level staff, in particular midwives providing first emergency care without doctors
- Availability of emergency team 24/24h in case of emergencies ~~ease~~
- In the admission and on labour ward, a system in place which allows to call all relevant staff in case of an emergency (emergency button)
- Availability of emergency lab 24/24h
- Availability of staff 24/24h in the event of a need for blood transfusion, especially in rural areas
- Set up of separate room for managing emergency cases
- Availability of emergency kit for managing emergency cases
- Improved availability of essential drugs, such as misoprostol, i/v antihypertensive
- Enhanced collaboration between clinical staff and management of the facility, for improving practical aspects of organisation of care (eg supplies, maintenance, staff shifts)
- Development of clear job description to specific roles and responsibilities, facilitating effective team work
- Improved monitoring after caesarean section and/or obstetric complications (eg training and use of checklists)
- Improved team work
- Reported improvement in quality of care delivered \*

\*not further specified in available local/national reports.

# BMJ Open

## What is the quality of the maternal near-miss case reviews in the WHO European Region? Cross-sectional study in Armenia, Georgia, Latvia, Republic of Moldova and Uzbekistan

|                                 |                                                                                                                                                                                                                                                                                                                                                                                                                                                                                                                                                                                                                                                                                                                                                                                                          |
|---------------------------------|----------------------------------------------------------------------------------------------------------------------------------------------------------------------------------------------------------------------------------------------------------------------------------------------------------------------------------------------------------------------------------------------------------------------------------------------------------------------------------------------------------------------------------------------------------------------------------------------------------------------------------------------------------------------------------------------------------------------------------------------------------------------------------------------------------|
| Journal:                        | <i>BMJ Open</i>                                                                                                                                                                                                                                                                                                                                                                                                                                                                                                                                                                                                                                                                                                                                                                                          |
| Manuscript ID                   | bmjopen-2017-017696.R2                                                                                                                                                                                                                                                                                                                                                                                                                                                                                                                                                                                                                                                                                                                                                                                   |
| Article Type:                   | Research                                                                                                                                                                                                                                                                                                                                                                                                                                                                                                                                                                                                                                                                                                                                                                                                 |
| Date Submitted by the Author:   | 12-Dec-2017                                                                                                                                                                                                                                                                                                                                                                                                                                                                                                                                                                                                                                                                                                                                                                                              |
| Complete List of Authors:       | Bacci, Alberta; WHO Collaborating Centre for Maternal and Child Health, Institute for Maternal and Child Health IRCCS Burlo Garofolo Hodorozea, Stelian ; State Medical and Pharmaceutical University "N. Testemitanu", Khachatryan , Henrik ; WHO Country Office in Armenia Babojonova, Shohida ; Republican Perinatal Center Irsa, Signe ; Pauls Stradins Clinical University Hospital Jansone, Maira ; Riga Stradins University Dondiuc, Iurie ; Municipal Clinical Hospital Nr 1 Matarazde, George ; UNFPA Country Office Lazdane, Gunta ; Division of Noncommunicable Diseases and Promoting Health through the Life-course, WHO Regional Office for Europe Lazzerini, Marzia; WHO Collaborating Centre for Maternal and Child Health, Institute for Maternal and Child Health IRCCS Burlo Garofolo |
| <b>Primary Subject Heading</b>: | Global health                                                                                                                                                                                                                                                                                                                                                                                                                                                                                                                                                                                                                                                                                                                                                                                            |
| Secondary Subject Heading:      | Obstetrics and gynaecology                                                                                                                                                                                                                                                                                                                                                                                                                                                                                                                                                                                                                                                                                                                                                                               |
| Keywords:                       | Maternal health, near miss case review, standard based assessment, quality of care, middle income countries                                                                                                                                                                                                                                                                                                                                                                                                                                                                                                                                                                                                                                                                                              |
|                                 |                                                                                                                                                                                                                                                                                                                                                                                                                                                                                                                                                                                                                                                                                                                                                                                                          |

SCHOLARONE™  
Manuscripts

# What is the quality of the maternal near-miss case reviews in the WHO European Region? Cross-sectional study in Armenia, Georgia, Latvia, Republic of Moldova and Uzbekistan

**Running title:** Quality of the near-miss case reviews

Alberta Bacci,<sup>1</sup> Stelian Hodorozea,<sup>2</sup> Henrik Khachatryan,<sup>3</sup> Shohida Babojonova,<sup>4</sup> Signe Irsa,<sup>5</sup> Maira Jansone,<sup>6</sup> Iurie Dondiuc,<sup>7</sup> George Matarazde,<sup>8</sup> Gunta Lazdane,<sup>9</sup> Marzia Lazzerini<sup>1</sup>

1 WHO Collaborating Centre for Maternal and Child Health, Institute for Maternal and Child Health IRCCS Burlo Garofolo, Via dell'Istria 65/1, 34137 Trieste, Italy.

2 State Medical and Pharmaceutical University "N. Testemitanu", Stefan cel Mare si Sfiant str. 165, MD2004, Chisinau, Moldova.

3 WHO Country Office in Armenia, 9, Alek Manukyan st., Suite 211, Yerevan 0070, Armenia

4 Republican Perinatal Center, Dj. Abidova str. 223, Tashkent, Uzbekistan.

5 Pauls Stradins Clinical University Hospital, Pilsoņu iela 13, LV-1002 Riga, Latvia

6 Riga Stradins University, Dzirciema street 16, Riga, LV-1007, Latvia

7 Municipal Clinical Hospital Nr 1, Melestiu 20 str. Chisinau, MD 2017, Moldova

8 UNFPA Country Office, 9 Eristavi str., UN House, Tbilisi 0179, Georgia

9 Division of Noncommunicable Diseases and Promoting Health through the Life-course, WHO Regional Office for Europe, UN City, Marmorvej 51, DK-2100 Copenhagen, Denmark

## Corresponding author

Marzia Lazzerini DTMH, MSc, PhD

WHO Collaborating Centre for Maternal and Child Health  
Institute for Maternal and Child Health IRCCS Burlo Garofolo  
Via dell'Istria 65/1, 34137, Trieste, ITALY  
Tel: +39 040 3785 555 Fax: +39 040 3785 260

## Authors' e-mail contacts

AB: [baccialberta@gmail.com](mailto:baccialberta@gmail.com)

SH: [stelian21@hotmail.com](mailto:stelian21@hotmail.com)

HK: [khachatryanh@who.int](mailto:khachatryanh@who.int)

SB: [shohida\\_bd@mail.ru](mailto:shohida_bd@mail.ru)

SI: [Signe.Irsa@stradini.lv](mailto:Signe.Irsa@stradini.lv)

MJ: [Maira.Jansone@stradini.lv](mailto:Maira.Jansone@stradini.lv)

ID: [iurie\\_dondiuc@yahoo.com](mailto:iurie_dondiuc@yahoo.com)

GM: [mataradze@unfpa.org](mailto:mataradze@unfpa.org)

GL: [lazdaneg@who.int](mailto:lazdaneg@who.int)

ML: [marzia.lazzerini@burlo.trieste.it](mailto:marzia.lazzerini@burlo.trieste.it)

## ABSTRACT

**Objectives** The maternal near-miss case review (NMCR) cycle is a type of clinical audit aiming at improving quality of maternal health care by discussing near-miss cases. In several countries this approach has been introduced and supported by WHO and partners since 2004, but information on the quality of its implementation is missing. This study aimed at evaluating the quality of the NMCR implementation in selected countries within the WHO European Region.

**Design** Cross sectional study

**Settings** Twenty-three maternity units in Armenia, Georgia, Latvia, Moldova, Uzbekistan

**Assessment tools** A predefined checklist including 50 items, according to the WHO methodology. Quality in the NMCR implementation was defined by summary scores ranging from 0 (totally inappropriate) to 3 (appropriate).

**Results** Quality of the NMCR implementation was heterogeneous among different countries, and within the same country. Overall, the first part of the audit cycle (from case identification to case analysis) was fairly well performed (mean score 2.00, 95%CI 1.94 to 2.06), with the exception of the “inclusion of users views” (mean score 0.66, 95%CI 0.11 to 1.22), while the second part (developing recommendations, implementing them, ensuring quality) was poorly performed (mean score 0.66, 95%CI 0.11 to 1.22). Each country had at least one champion facility, where quality of the NMCR cycle was acceptable. Quality of the implementation was not associated with its duration. Gaps in implementation were of technical, organisational, and attitudinal nature.

**Conclusions** Ensuring quality in the NMCR may be difficult but achievable. The high heterogeneity in results within the same country suggests that quality of the NMCR implementation depends, to a large extent, from hospital factors, including staff's commitment, managerial support, local coordination. Efforts should be put in preventing and mitigating common barriers that hamper successful NMCR implementation.

## Article summary: strengths and limitations of this study

- This is the first study reporting on the quality of the hospital based near-miss case review (NMCR) in Central Asia and Eastern Europe.
- The assessment included five countries within the WHO European Region and was based on a predefined checklist, providing the opportunity to evaluate the implementation of the NMCR approach in a standardised manner.
- In three countries facilities included in the evaluation accounted for all facilities implementing the NMCR within in the country. In the remaining two countries, where the NMCR were implemented in more hospitals, facilities were chosen in dialogue with local authorities (non-probability sampling), and not at random; however, criteria used to select facilities included also geographical distribution (i.e. so that different regions were represented) and hospital type (i.e. different types of hospitals were selected).

### Keywords

Maternal health; near miss case review; standard based assessment; quality of care; middle-income countries

### Disclosure of interests

None competing interest

### List of abbreviations

IQL= interquartile

MoH= Ministry of Health

NMCR= Near miss cases review

UNFPA= United Nation Population Fund

WHO = World Health Organization

95%CI= 95% Confidence intervals

## INTRODUCTION

Ensuring adequate quality of health care is a primary objective of the World Health Organization (WHO) Global Strategy for Women's, Children's and Adolescent's Health 2016-2030 (1) and of Health 2020, the European strategic framework setting the policy directions for the 53 Member States in the WHO European Region (2). Quality in health care is recognized as essential for the health and well-being of the population, and as a basic aspect of human rights (3-5).

Among the different strategies aiming at improving quality of care at maternity services, the facility-based maternal near miss cases review (NMCR) cycle was proposed by WHO in 2004 as a type of clinical audit (6-8). In respect to mortality audit, the near-miss case review has the advantage to imply less legal issues, and is therefore perceived as more acceptable by staff. Near-miss cases are defined as a woman who nearly died but survived a complication that occurred during pregnancy, childbirth or within six weeks after pregnancy (9). In the facility-based NMCR all hospital staff involved in the management of the chosen near-miss case - including obstetricians, midwives, nurses and ancillary staff - get together to discuss and evaluate the care provided against national evidence-based guidelines, local protocols and standards of care. The aim of the case review is to critically discuss local management, procedures and attitudes, and to identify areas that can be further improved (9). Actions to improve quality of maternal health care are proposed and agreed by hospital staff, and subsequently monitored to check their implementation, as for a continuous quality improvement process (9). One of the key characteristics of this



1 method is the bottom-up approach, aiming at facilitating local ownership of the process,  
2  
3  
4 commitment in implementing the proposed recommendations, and team-building.  
5  
6  
7 Currently, the review of severe maternal morbidity cases (“near-miss” events) is  
8  
9 recommended by WHO as a key action to eliminate avoidable maternal and perinatal  
10  
11 mortality and morbidity and improve the quality of care (10).  
12  
13  
14

15  
16 While in some countries within the WHO European Region (such as UK, Norway, the  
17  
18 Netherlands) the practice of reviewing maternal near miss cases was introduced by the  
19  
20 government or by professional associations, in several other countries (most often middle-  
21  
22 income countries) its implementation was assisted by the WHO and/or United Nation  
23  
24 Population Fund (UNFPA). In the later scenario, coverage and quality of the NMCR  
25  
26 implementation were usually discussed during workshops (11-13), but so far they have not  
27  
28 been evaluated using a systematic methodology.  
29  
30  
31  
32  
33

34  
35 In 2015, WHO developed a checklist for assessing the quality of the implementation of the  
36  
37 NMCR cycle at hospital level through a systematic methodology (9). This study aimed at  
38  
39 evaluating the quality of the NMCR implementation in five countries of Eastern Europe and  
40  
41 central Asia, using the WHO checklist, to identify common strengths and weaknesses  
42  
43 among different settings.  
44  
45  
46  
47  
48  
49

## 50 **MATERIAL AND METHODS**

### 51 52 53 54 **Population and setting**

1  
2 The assessment was conducted in Armenia, Georgia, Latvia, Republic of Moldova, and  
3  
4 Uzbekistan between June 2015 and October 2016. Countries were chosen based on the  
5  
6 following criteria: i) activities planned by the Ministry of Health (MoH) included a quality  
7  
8 assessment of the NMCR; ii) there was a request for technical assistance from WHO or  
9  
10 UNFPA.  
11  
12

13  
14  
15  
16 In all of the countries the NMCR approach was introduced following the WHO  
17  
18 methodology (9). The year of NMCR introduction differed among countries (Table 1).  
19  
20

21  
22  
23  
24 The number of facilities visited in each country depended on the total number of hospitals  
25  
26 implementing the NMCR cycle: in Armenia, Georgia and Latvia all facilities implementing  
27  
28 the NMCR were visited; in Moldova and Uzbekistan, where a large number of maternity  
29  
30 units are implementing the NMCR, a sample was selected in agreement with the MoH and  
31  
32 the national NMCR coordinator/s, following a geographical criteria (i.e. so that different  
33  
34 regions were represented) and including different type of hospitals. Overall, 23 maternity  
35  
36 units were visited in the five selected countries (Table 1).  
37  
38  
39  
40

#### 41 42 **Data collection**

43  
44  
45  
46  
47 Each facility was visited for at least the duration of a whole day by two independent  
48  
49 external experts with long term experience in NMCR implementation. The international  
50  
51 team was joined by the national assessors, experienced in NMCR implementation at local  
52  
53 level. The team was under the leadership of one international assessor (AB), who  
54  
55  
56  
57  
58  
59  
60

1 participated to all hospital visits, with the objective of ensuring standards procedures in all  
2  
3  
4 assessments.  
5  
6  
7

8  
9 The assessment was carried out using a checklist developed by WHO to evaluate the  
10 quality of the NMCR cycle at hospital level (Table S1). The checklist was developed by  
11 WHO in 2014, field-tested and optimised for use in early 2015 (9). The methodology for  
12 the quality assessment is fully described in a WHO manual (9). Briefly, the checklist  
13 includes 50 items, grouped in 11 domains. The sources of information for the assessment  
14 includes: direct observation and evaluation of one or more NMCR sessions; discussion  
15 with participants, coordinators and managers; documents from the NMCR sessions  
16 (templates and notes from the sessions); local documents (regional/local policies and  
17 guidance documents; protocols and standards for care; documents related to quality  
18 assurance, monitoring and supervision; reports on NMCR activities); national documents  
19 (national policies and guidance documents, guidelines, reports on NMCR implementation).  
20 According to the WHO methodology, using the WHO manual (9) as source of standards,  
21 each of the 50 items was scored from 0 (totally inappropriate) to 3 (appropriate) (Table  
22 S1). For each of the 11 domains the arithmetic mean and 95% confidence intervals  
23 (95%CI) among all the items in that domain were calculated. The median and the range  
24 between the first and third quartile (IQL range) were also calculated.  
25  
26  
27  
28  
29  
30  
31  
32  
33  
34  
35  
36  
37  
38  
39  
40  
41  
42  
43  
44  
45  
46  
47  
48  
49

50 In each facility, immediately after the assessment, feedbacks were discussed with the local  
51 staff and plans for improvement of the NMCR implementation were developed, using a  
52 simple matrix (Table S1).  
53  
54  
55  
56  
57  
58  
59  
60

1  
2 After completing the visits to all maternity units in the country, a national restitution  
3  
4 workshop was organised involving representatives from the hospitals, health authorities,  
5  
6 professional organisations and partners. During the workshop, achievements and  
7  
8 constraints were presented and underlying reasons were discussed. Recommendations  
9  
10 for improvement were developed and synthesised in a standard pre-defined simple matrix  
11  
12 (Table S1).  
13  
14  
15  
16  
17  
18  
19

### 20 **Ethical considerations**

21  
22  
23  
24  
25 Activities of this observational study were initiated upon request of the MoHs and carried  
26  
27 out in close collaboration with the health authorities; ethical approval was not required.  
28  
29 Information to hospital staff was provided by MoH representatives and local authorities. All  
30  
31 people involved in the NMCR sessions were informed about the purpose of the visit and  
32  
33 oral consent from the hospital staff and local coordinators and facilitators participating to  
34  
35 the observed sessions was obtained. The review of near-miss cases was carried forward  
36  
37 anonymously, i.e. information that may have disclosed the identity of the patient, or  
38  
39 providers of care was not reported (9). This study did not aim at directly comparing  
40  
41 countries or single facilities with different background, context, and timelines of  
42  
43 implementation, therefore results of the assessment are reported in an anonymous way,  
44  
45 according to WHO methodology (9). Detailed finding of the assessment together with  
46  
47 feedback on how to improve quality of the NMCR implementation were provided to each  
48  
49 facility and to each country individually.  
50  
51  
52  
53  
54  
55  
56  
57  
58  
59  
60

## RESULTS

The assessment pointed out that quality of the implementation of the NMCR cycle was heterogeneous among different countries, as well as among different hospitals within the same country. Table 2 reports the results of the summary scores, for each of the 11 domains of the WHO assessment checklist.

Overall, the first part of the audit cycle (step 1-6 in Table 2, i.e. from case identification to case analysis) was on average fairly well performed in all countries (mean score 2.00, 95%CI 1.94 to 2.06), with the exception of the domain “inclusion of users’ views” which was poorly implemented in most facilities (mean score 1.06, 95%CI 0.12 to 2.00). The second part of the audit cycle (step 7-10), which involves developing appropriate recommendations, implementation of the recommendations, follow up, documentation and dissemination of results within the facility and the country, was on average poorly performed in all countries (mean score 1.20, 95%CI 0.93 to 1.46). In particular, the domain 11 “ensuring quality in the NMCR cycle”, which implies a process of periodical quality assessment, development of recommendation for quality improvement, and related actions, was overall substandard (mean score 0.66, 95%CI 0.05 to 1.28), with the exception of country E, where regular monitoring and supervision was carried out by a team that included national and international members.

In each country it was possible to identify at least one “champion” facility, where quality of the NMCR cycle had only minor deficiencies (A-H3, B-H4, C-H1, D-H3, EH1 and H2). On the other hand, in a few facilities (A-H2, B-H1 and H3, CH6) most of the areas assessed

1  
2 were judged as “totally inappropriate”.  
3  
4  
5

6 In some facilities examples of good practices were also observed for domains that were on  
7 average implemented on a substandard level at a country-level. For examples, despite  
8 inclusion of users views being substandard in most facilities in countries B and D (mean  
9 scores 1.11, 95%CI 0 to 2.22 and 0.61, 95%CI 0 to 1.48 respectively) single facilities  
10 reached good scores (B-H4 had a score of 3 and D-H3 had a score of 2), being able to  
11 regularly interview women and incorporating their views in the development of  
12 recommendations to improve hospital care (Table 2).  
13  
14  
15  
16  
17  
18  
19  
20  
21  
22  
23  
24

25 On average, quality of the implementation of NMCR was on a higher level in Country E,  
26 where evaluation scores pointed out that there were only few weaknesses in  
27 implementation compared to other countries (mean score 2.12, 95%CI 1.84 to 2.39).  
28  
29  
30  
31  
32  
33  
34

35 Table 3 summarises main common strengths and weaknesses in the quality of the NMCR  
36 implementation, as divided in three categories: (i) those mostly related to technical  
37 aspects, (ii) those predominantly of organisational nature, and (iii) those related to the  
38 attitude toward the NMCR. The main technical strength was that, beside the existence of  
39 appropriate technical skills in the methodology, most facilities developed several  
40 recommendations that were achievable, realistic, time-bound- and with a potential impact  
41 on the quality of care. Although recommendations were not always well documented (thus  
42 resulting in low scores under domain 10,) gaps in reporting results did not always indicated  
43 actual gaps in implementation, and in many cases several recommendations were actually  
44 implemented. This was a common observation in country B, where recommendations  
45  
46  
47  
48  
49  
50  
51  
52  
53  
54  
55  
56  
57  
58  
59  
60

1  
2 were poorly recorded, but several actions to improve quality of care -such as setting up  
3  
4 emergency kits and related protocols, and introducing the Modified Obstetric Early  
5  
6 Warning Score (MEOWS) chart (14)- were actually implemented. Among strength in  
7  
8 organisational aspects, the most important was that NMCR were regularly held, and  
9  
10 staffing at all levels, including midwives, participated. Main strengths in attitude included  
11  
12 the endorsement and application of the basic principles of the NMCR (confidentiality,  
13  
14 openness, respecting diverging opinions, avoiding blame).  
15  
16  
17  
18  
19  
20

21 Main gaps in technical aspects were: inappropriate case reconstruction; case analysis not  
22  
23 getting to the “real point” and not using a “why but why” approach (i.e. discussion of  
24  
25 underlying causes); recommendations not being fully SMART (Specific, Measurable,  
26  
27 Achievable, Realistic, Time-bound (15). Main gaps of organisational nature were: lack of  
28  
29 continuity in the role of facilitator/coordinator; lack of proper dissemination of the results  
30  
31 (i.e. circulation of information within the facility level and at national level on how many and  
32  
33 what type of recommendations were developed); lack of follow up on previous  
34  
35 recommendations. Major gaps in adopting the background philosophy and principles of the  
36  
37 NMCR were observed in some facilities such as: lack of respect for other people’s opinion;  
38  
39 persistence of blaming and judging others rather than using the NMCR cycle to discuss  
40  
41 and improve ways of working; insufficient involvement of mid-level staff. Lack of inclusion  
42  
43 of the users’ view, which was a frequent observation, was reported to be due to the lack of  
44  
45 trained interviewers, and this was interpreted as not merely an organisational gap, but also  
46  
47 as a problem in attitude of the of the health providers, i.e. lack of understanding the  
48  
49 importance of taking into account the women’s point of view. Finally, common to most  
50  
51  
52  
53  
54  
55  
56  
57  
58  
59  
60

1 facilities, there was insufficient monitoring and evaluation, and lack of a quality assurance  
2 mechanism. In most cases this was due to deficiencies in establishing and efficiently  
3 running a NMCR coordination system at national level.  
4  
5  
6  
7  
8  
9

10  
11 Recommendations developed by local stakeholders during the national restitution  
12 workshops were setting-specific. Nevertheless, there were several similarities. The most  
13 frequent/relevant recommendations developed for implementation at different levels -  
14 hospital level, national level, WHO and development partners - are reported in Table 4.  
15  
16  
17  
18  
19  
20  
21  
22

23 Examples of the observed impact of the NMCR on quality of care at facility level are  
24 reported in Table S2. Despite progress was often poorly reported both in the hospital and  
25 in national reports, several achievements could be observed. These included improved  
26 use of national clinical guidelines, development and use of local protocols and standards  
27 of care, better availability and organisation of emergency services, improved autonomy of  
28 midwives, and positive dynamics such as improved team working.  
29  
30  
31  
32  
33  
34  
35  
36  
37  
38  
39

## 40 DISCUSSION

41  
42  
43

44 This study aimed at evaluating the quality of the NMCR at hospital level in selected  
45 countries within the WHO European Region using a standardised checklist and  
46 methodology. Overall the assessment pointed out that the practise of reviewing near-miss  
47 cases at hospital level is currently ongoing in all countries included in this study; however,  
48 both coverage and quality of the implementation of the NMCR cycle is heterogeneous.  
49  
50  
51  
52  
53  
54  
55  
56  
57 Overall, while first part of the audit cycle (from case identification to case analysis) was  
58  
59  
60



1  
2 fairly well performed, with the exception of the “inclusion of users’ views”, the second part  
3  
4 of the audit cycle (developing recommendations, implementing them, ensuring quality) was  
5  
6 in general poorly performed. Gaps in implementation were both of technical,  
7  
8 organisational, and attitudinal nature.  
9  
10

11  
12  
13 These findings are not entirely surprising. Previous, although less systematic, evaluations  
14  
15 in the same geographical area pointed a series of challenges (7,8,11,12) in effectively  
16  
17 implementing the review of near-miss cases at facility level. Beside technical and  
18  
19 organisational challenges, the successful implementation of clinical audits such as the  
20  
21 NMCR often calls for a major change in staff’s attitude (7,8,11,12). In the country  
22  
23 assessed, especially in the Ex-Soviet countries, the successful implementation of the  
24  
25 NMCR aims at moving away from a “traditional” system of carrying forward clinical audits,  
26  
27 where blame and punishment were the routine, subjective judgment were the rule and  
28  
29 audit involved only doctors, while midwives, other mid-level staff and service users had no  
30  
31 voice (7,8,11,12). The “traditional” audit system mainly resulted in punishing single  
32  
33 individuals, rather than at looking to the health system failures and finding solutions at  
34  
35 organisational level (7,8,11,12). Changing practices involved building knowledge and skills  
36  
37 together with a drastic shift in attitude. Given these substantial constraints, the successful  
38  
39 implementation of the NMCR at least in one country (Country E) and in several champion  
40  
41 maternity units in other countries, must be seen as a positive achievement, proving that  
42  
43 NMCR can be successfully implemented in different settings.  
44  
45  
46  
47  
48  
49  
50  
51  
52  
53

54 This paper reports the quality of the NMCR implementation in middle-income countries  
55  
56 (Armenia, Moldova, Uzbekistan are lower middle income countries, Georgia is an upper  
57  
58

1  
2 middle income countries), where the NMCR was carried forward with relatively limited  
3  
4 resources. Findings of this assessment cannot be generalised to other high-income  
5  
6 countries of the WHO European region, such as UK, Norway, the Netherlands, where the  
7  
8 practice of reviewing maternal near miss cases has been institutionalised, with major  
9  
10 efforts on creating coordinating mechanisms (16-18). However, it must be acknowledged  
11  
12 that the review of near miss cases at facility level is still not a routine practice in many  
13  
14 European countries. We were unable to identify any study reporting on a standard-based  
15  
16 assessment of the quality of the NMCR from any country of the WHO European region.  
17  
18  
19  
20  
21  
22

23 Interestingly, findings of this study suggest that quality of the implementation of the NMCR  
24  
25 cycle is not strictly associated to the duration of the implementation. However, it is also  
26  
27 true that adequate time is needed for implementation, and completing a pilot phase in a  
28  
29 country cannot take less than 18-24 months from the first technical workshop. In this  
30  
31 regard, it must be acknowledged that country B started piloting just six months before the  
32  
33 quality assessment; therefore, observed results in this country can be interpreted as  
34  
35 satisfactory given the short time frame.  
36  
37  
38  
39  
40  
41

42 The high heterogeneity in results within the same country (such as in the case of country  
43  
44 A, B, and D) suggests that quality of the NMCR implementation depends, to a large extent,  
45  
46 from hospital factors, including staff's commitment, managerial support, and local  
47  
48 coordination. These results are in line with a systematic review on facilitators and barriers  
49  
50 to effective implementation of NMCR cycle, pointing out that hospital factors (good  
51  
52 leadership), together with a system of coordination (which often includes external support),  
53  
54 are key enablers for effective NMCR implementation (19).  
55  
56  
57  
58  
59  
60

1  
2  
3  
4 This assessment pointed out that, despite WHO recommends conducting an interview with  
5  
6 the women/her family for each near miss case, inclusion of women's view was still  
7  
8 substandard in many of the assessed facilities. However, some facilities (B-H4, D-H3)  
9  
10 reached good scores even when this domain was problematic at a country level (Table 2).  
11  
12 In the WHO framework, "experience of care" is one of the two key components of quality of  
13  
14 maternal and newborn health care, along with "provision of care" (1,2). The views of  
15  
16 women and their families can provide relevant information on aspects related to case  
17  
18 management, including important details on what happened, such as organizational issues  
19  
20 communication issues, and respectful care. In a study in Moldova it was observed that the  
21  
22 implementation of NMCR improved attitude towards patients (20), while in Kazakhstan it  
23  
24 successfully improved patients' satisfaction (21,22).  
25  
26  
27  
28  
29  
30  
31

32 This study points out that quality in the reporting on the NMCR activities was overall low.  
33  
34 The WHO manual now provides a series of templates to facilitate a uniform reporting (9).  
35  
36 Sustained monitoring and evaluation based on appropriate reporting, as well as periodical  
37  
38 quality assessments should be part of a strategy to achieve quality in the NMCR  
39  
40 implementation.  
41  
42  
43  
44  
45

46 This paper has the merit of reporting the actual state of implementation of NMCR in a real  
47  
48 setting and not in a study setting (where usually a limited number of facilities is involved for  
49  
50 a limited period of time, with dedicated human and financial resources). Another strength  
51  
52 of the study is that the evaluation was carried out in a systematic way using a predefined  
53  
54 standardised tool and methodology, aiming at evaluating all key aspects that contribute to  
55  
56  
57  
58  
59  
60

1  
2 overall NMCR quality (table S1) (9). To our knowledge, no other previous similar  
3  
4 systematic evaluations have been performed.  
5  
6  
7

8  
9 We acknowledge that the scoring system utilised by the checklist may be open to some  
10  
11 subjectivity. However, this scoring system is similar to others extensively used by WHO in  
12  
13 the last 15 years for systematic, standard based, quality assessments, and it proved to be  
14  
15 able to capture key elements of quality of the implementation in both pragmatic and  
16  
17 research settings (23-27). No other validated tool or scoring system exists to assess  
18  
19 quality of the NMCR. The checklist and its score system were field tested before use, until  
20  
21 when they were considered satisfactory covering all key aspects of quality of NMCR (9).  
22  
23  
24 The score is attributed by a team of experts, thus reducing subjectivity of the single  
25  
26 individual in the evaluation (9).  
27  
28  
29

30  
31 As a second limitation we acknowledge that in two out of the total five countries (Moldova  
32  
33 and Uzbekistan), the sample was selected based on MoH indications (non-probability  
34  
35 sampling), and one cannot exclude a selection bias towards the better performing  
36  
37 institutions. However, we emphasize that the main purpose of the assessment was to  
38  
39 create an opportunity at national level to discuss quality of the NMCR, and to develop  
40  
41 recommendations for improvement. Subsequent assessments could extend the evaluation  
42  
43 to other facilities and monitor progress in specific areas.  
44  
45  
46  
47  
48  
49  
50

51 Based on the results of this study, in the future more efforts should be put in evaluating the  
52  
53 quality of the implementation of NMCR on a regular basis. More implementation studies  
54  
55  
56  
57  
58  
59  
60

1  
2 should explore interventions aiming at improving quality of the NMCR implementation in  
3  
4 different settings.  
5  
6  
7

8 The objective of this study was not evaluating the impact of the implementation of the  
9  
10 NMCR, but rather the quality of the process. Nevertheless, several achievements could be  
11  
12 observed (Table S2), despite this type of information was not consistently available. These  
13  
14 results are in line with other studies (28-41) and a systematic review reporting that NMCR  
15  
16 is an effective strategy in improving quality of care when measured against predefined  
17  
18 standards and it may even significantly reduce maternal mortality in high burden countries  
19  
20  
21  
22  
23 (42).  
24  
25  
26

## 27 **Conclusions**

28  
29  
30  
31 Ensuring high quality in the implementation of the NMCR may be difficult in countries of  
32  
33 Eastern Europe and central Asia, but achievable. In the future more efforts should be put  
34  
35 in evaluating the quality of the implementation of NMCR on a regular basis, capitalising  
36  
37 from these lessons, and preventing and mitigating common barriers that hamper  
38  
39 successful implementation. The availability of a new manual on how to implement and to  
40  
41 monitor the NMCR at facility level, and of a standard methodology for assessing quality of  
42  
43 the NMCR, as well as templates for reporting (9) may facilitate this process.  
44  
45  
46  
47  
48  
49

## 50 **Acknowledgments**

51 We would like to thanks the local NMCR country coordinators, the hospitals staff, WHO  
52  
53 regional and country staff and development partners who collaborated in the organisation  
54  
55 of the assessment missions. We thank Sonia Richardson for language revision in this  
56  
57 paper.  
58  
59  
60

## **Funding**

The assessment was supported by WHO Regional Office for Europe and UNFPA Regional Office for Eastern Europe and Central Asia

## **Author contributions**

AB and ML conceived the study, analysed the data and wrote the first draft of the paper  
AB, SH, HK, SB, SI, MJ, ID, GM, GL collected data and contribute to the final draft of the paper

GL and GM contributed by procuring funds

All author contributed to the final version of the paper.

## **Data Sharing statement**

Additional details on the country assessments can be obtain from the first author

## REFERENCES

1. World Health Organization. Global Strategy for Women's, Children's and Adolescent's Health 2016-2030 Available at <http://www.who.int/life-course/partners/global-strategy/global-strategy-2016-2030/en/> (accessed Dec 15, 2016)
2. World Health Organization (WHO), Regional Office for Europe. Health 2020: the European policy for health and well-being. WHO Regional Office for Europe, Copenhagen 2013. Available at <http://www.euro.who.int/en/health-topics/health-policy/health-2020-the-european-policy-for-health-and-well-being/publications/2013/health-2020-a-european-policy-framework-and-strategy-for-the-21st-century> (accessed Dec 15, 2016)
3. World Health Organization (WHO). The prevention and elimination of disrespect and abuse during facility-based childbirth. World Health Organization, Geneva, 2014. Available at [http://apps.who.int/iris/bitstream/10665/134588/1/WHO\\_RHR\\_14.23\\_eng.pdf?ua=1&ua=1](http://apps.who.int/iris/bitstream/10665/134588/1/WHO_RHR_14.23_eng.pdf?ua=1&ua=1) (accessed Sept 15, 2016)
4. Tunçalp O, Were WM, MacLennan C, Oladapo OT, Gülmezoglu AM, Bahl R, Daelmans B, Mathai M, Say L, Kristensen F, Temmerman M, Bustreo F. Quality of care for pregnant women and newborns—the WHO vision. *BJOG*. 2015 Jul;122(8):1045-9.
5. World Health Organization, Standards for improving quality of maternal and newborn care in health facilities. Geneva: World Health Organization, 2016. Available at [http://www.who.int/maternal\\_child\\_adolescent/documents/improving-maternal-newborn-care-quality/en/](http://www.who.int/maternal_child_adolescent/documents/improving-maternal-newborn-care-quality/en/) (accessed Sept 15, 2016)
6. World Health Organization. Beyond the numbers: Reviewing maternal deaths and complications to make pregnancy safer. World Health Organization, Geneva, 2004. Available at <http://whqlibdoc.who.int/publications/2004/9241591838.pdf?ua=1> (accessed Sept 15, 2016)
7. Bacci A, Lewis G, Baltag V, Betrán AP. The introduction of confidential enquiries into maternal deaths and near-miss case reviews in the WHO European Region. *Reprod Health Matters*. 2007 Nov;15(30):145-52.
8. Bacci A. Implementing “Beyond The Numbers” across the WHO European Region: steps adopted, challenges, successes and current status. *Entre Nous* 2010; 70; 6-7.
9. World Health Organization. Regional Office for Europe. Conducting a maternal near-miss case review cycle at the hospital level” manual with practical tools. Available at <http://www.euro.who.int/en/health-topics/Life-stages/maternal-and-newborn-health/publications/2016/conducting-a-maternal-near-miss-case-review-cycle-at-hospital-level-2016> (accessed November 29, 2016)
10. World Health Organization Regional Office for Europe. Action plan for sexual and reproductive health: towards achieving the 2030 Agenda for Sustainable Development in Europe – leaving no one behind. Copenhagen: World Health Organization Regional Office for Europe; 2016. Available at [http://www.euro.who.int/\\_\\_data/assets/pdf\\_file/0018/314532/66wd13e\\_SRHActionPlan\\_160524.pdf](http://www.euro.who.int/__data/assets/pdf_file/0018/314532/66wd13e_SRHActionPlan_160524.pdf) (accessed Nov 15, 2016)

- 1  
2  
3  
4  
5  
6  
7  
8  
9  
10  
11  
12  
13  
14  
15  
16  
17  
18  
19  
20  
21  
22  
23  
24  
25  
26  
27  
28  
29  
30  
31  
32  
33  
34  
35  
36  
37  
38  
39  
40  
41  
42  
43  
44  
45  
46  
47  
48  
49  
50  
51  
52  
53  
54  
55  
56  
57  
58  
59  
60
11. World Health Organization. Regional Office for Europe. Multi-Country review meeting on maternal mortality and morbidity audit "Beyond the Numbers", Report of a WHO meeting, Charvak, Uzbekistan 14–17 June 2010. Copenhagen, WHO Regional Office for Europe, 2010. Available at <http://www.euro.who.int/en/health-topics/Life-stages/maternal-and-newborn-health/publications/2010/multi-country-review-meeting-on-maternal-mortality-and-morbidity-audit-beyond-the-numbers,-report-of-a-who-meeting,-charvak,-uzbekistan-1417-june-2010> (accessed September 8, 2016).
12. World Health Organization. Regional Office for Europe. The impact of implementation of 'Beyond the numbers' approach in improving maternal and perinatal health. 29-30 April 2014, Bishkek, Kyrgyzstan. Copenhagen, WHO Regional Office for Europe, 2014. Available at <http://www.euro.who.int/en/media-centre/events/events/2014/04/the-impact-of-implementation-of-beyond-the-numbers-approach-in-improving-maternal-and-perinatal-health> (accessed September 8, 2016).
13. WHO Regional Office for Europe Making Pregnancy Safer in Uzbekistan. Maternal mortality and morbidity audit Activities Report 2002-2008. Available at [http://www.euro.who.int/\\_data/assets/pdf\\_file/0004/98797/MPS\\_UZB.pdf](http://www.euro.who.int/_data/assets/pdf_file/0004/98797/MPS_UZB.pdf) (accessed september 8, 2016)
14. The Royal Free Hospital Nhs Trust Maternity Clinical Guidelines. MEOWS Guidance in Maternity. Available at [http://www.oaa-anaes.ac.uk/assets/\\_managed/editor/file/guidelines/meows/royal%20free%20meows%20guideline%20-%20mcglennan\\_.pdf](http://www.oaa-anaes.ac.uk/assets/_managed/editor/file/guidelines/meows/royal%20free%20meows%20guideline%20-%20mcglennan_.pdf) (accessed November 29, 2016)
15. Doran, G. T. (1981). "There's a S.M.A.R.T. way to write management's goals and objectives". *Management Review (AMA FORUM)* 70 (11): 35–36
16. Knight M, Lewis G, Acosta CD, Kurinczuk JJ. Maternal near-miss case reviews: the UK approach. *BJOG*. 2014 Sep;121 Suppl 4:112-6.
17. Marr L, Lennox C, McFadyen AK. Quantifying severe maternal morbidity in Scotland: a continuous audit since 2003. *Curr Opin Anaesthesiol*. 2014 Jun;27(3):275-81.
18. Knight M; INOSS. The International Network of Obstetric Survey Systems (INOSS): benefits of multi-country studies of severe and uncommon maternal morbidities. *Acta Obstet Gynecol Scand*. 2014 Feb;93(2):127-31.
19. Lazzarini M, Ciuch M, Covi B, Rusconi S, Bacci A. Facilitators and barriers to the effective implementation of the facility based maternal near-miss case reviews in low and middle income countries: systematic review (submitted for publication to BMJ Open in October 2017)
20. Baltag V, Filippi V, Bacci A. Putting theory into practice: the introduction of obstetric near-miss case reviews in the Republic of Moldova. *Int J Qual Health Care*. 2012 Apr;24(2):182-8
21. Sukhanberdiyev K, Ayazbekov A, Issina A, Abuova G, Hodorocea S, Bacci A. Initial experience of Near Miss Case Review: improving the management of haemorrhage. *Entre Nous* 2011: 74; 18-19.
22. Hodorocea S. Piloting near miss case reviews in Kazakhstan: improving quality of maternal care. *Entre Nous* 2010: 70; 28-29.



- 1
  - 2
  - 3
  - 4
  - 5
  - 6
  - 7
  - 8
  - 9
  - 10
  - 11
  - 12
  - 13
  - 14
  - 15
  - 16
  - 17
  - 18
  - 19
  - 20
  - 21
  - 22
  - 23
  - 24
  - 25
  - 26
  - 27
  - 28
  - 29
  - 30
  - 31
  - 32
  - 33
  - 34
  - 35
  - 36
  - 37
  - 38
  - 39
  - 40
  - 41
  - 42
  - 43
  - 44
  - 45
  - 46
  - 47
  - 48
  - 49
  - 50
  - 51
  - 52
  - 53
  - 54
  - 55
  - 56
  - 57
  - 58
  - 59
  - 60
23. Duke T, Keshishyan E, Kuttumuratova A, Ostergren M, Ryumina I, Stasii E, Weber MW, Tamburlini G. Quality of hospital care for children in Kazakhstan, Republic of Moldova, and Russia: systematic observational assessment. *Lancet*. 2006 Mar 18;367(9514):919-25.
24. Lazzerini M, Shukurova V, Davletbaeva M, Monolbaev K, Kulichenko T, Akoev Y, Bakradze M, Margieva T, Mityushino I, Namazova-Baranova L, Boronbayeva E, Kuttumuratova A, Weber MW, Tamburlini G. Improving the quality of hospital care for children by supportive supervision: a cluster randomized trial, Kyrgyzstan. *Bull World Health Organ*. 2017 Jun 1;95(6):397-407
25. Tamburlini G, Yadgarova K, Kamilov A, Bacci A; Maternal and Neonatal Care Quality Improvement Working Group. Improving the quality of maternal and neonatal care: the role of standard based participatory assessments. *PLoS One*. 2013 Oct 22;8(10):e78282.
26. Tamburlini G, Siupsinskas G, Bacci A; Maternal and Neonatal Care Quality Assessment Working Group.. Quality of maternal and neonatal care in Albania, Turkmenistan and Kazakhstan: a systematic, standard-based, participatory assessment. *PLoS One*. 2011;6(12):e28763.
27. Campbell H, Duke T, Weber M, English M, Carai S, Tamburlini G; Pediatric Hospital Improvement Group.. Global initiatives for improving hospital care for children: state of the art and future prospects. *Pediatrics*. 2008 Apr;121(4):e984-92.
28. Kayiga H, Ajeani J, Kiondo P, Kaye DK. Improving the quality of obstetric care for women with obstructed labour in the national referral hospital in Uganda: lessons learnt from criteria based audit. *BMC Pregnancy Childbirth*. 2016 Jul 11;16(1):152.
29. Mohd Azri MS, Edahayati AT, Kunasegaran K. Audit on management of eclampsia at Sultan Abdul Halim Hospital. *Med J Malaysia*. 2015 Jun;70(3):142-7.
30. Gebrehiwot Y, Tewolde BT. Improving maternity care in Ethiopia through facility based review of maternal deaths and near misses. *Int J Gynaecol Obstet*. 2014 Oct;127 Suppl 1:S29-34.
31. Luz AG, Osis MJ, Ribeiro M, Cecatti JG, Amaral E. Impact of a nationwide study for surveillance of maternal near-miss on the quality of care provided by participating centers: a quantitative and qualitative approach. *BMC Pregnancy Childbirth*. 2014 Apr 1;14:122
32. Kidanto HL, Wangwe P, Kilewo CD, Nystrom L, Lindmark G. Improved quality of management of eclampsia patients through criteria based audit at Muhimbili National Hospital, Dar es Salaam, Tanzania. Bridging the quality gap. *BMC Pregnancy Childbirth*. 2012 Nov 21;12:134.
33. van den Akker T, van Rhenen J, Mwangomba B, Lommerse K, Vinkhumbo S, van Roosmalen J. Reduction of severe acute maternal morbidity and maternal mortality in Thyolo District, Malawi: the impact of obstetric audit. *PLoS One*. 2011;6(6):e20776. doi: 10.1371/journal.pone.0020776. Epub 2011 Jun 3.
34. Bailey PE, Binh HT, Bang HT. Promoting accountability in obstetric care: use of criteria-based audit in Viet Nam. *Glob Public Health*. 2010;5(1):62-74.
35. van den Akker T, Mwangomba B, Irlam J, van Roosmalen J. Using audits to reduce the incidence of uterine rupture in a Malawian district hospital. *Int J Gynaecol Obstet*. 2009 Dec;107(3):289-94. doi: 10.1016/j.ijgo.2009.09.005. Epub 2009 Oct 28.
36. Hunyinbo KI, Fawole AO, Sotiloye OS, Otolorin EO. Evaluation of criteria-based clinical audit in improving quality of obstetric care in a developing country hospital. *Afr J Reprod Health*. 2008 Dec;12(3):59-70

- 1  
2  
3  
4  
5  
6  
7  
8  
9  
10  
11  
12  
13  
14  
15  
16  
17  
18  
19  
20  
21  
22  
23  
24  
25  
26  
27  
28  
29  
30  
31  
32  
33  
34  
35  
36  
37  
38  
39  
40  
41  
42  
43  
44  
45  
46  
47  
48  
49  
50  
51  
52  
53  
54  
55  
56  
57  
58  
59  
60
37. Kongnyuy EJ, Leigh B, van den Broek N. Effect of audit and feedback on the availability, utilisation and quality of emergency obstetric care in three districts in Malawi. *Women Birth*. 2008 Dec;21(4):149-55.
  38. Kongnyuy EJ, Mlava G, van den Broek N. Criteria-based audit to improve a district referral system in Malawi: a pilot study. *BMC Health Serv Res*. 2008 Sep 22;8:190.
  39. Müffler N, Trabelssi M, De Brouwere V. Scaling up clinical audits of obstetric cases in Morocco. *Tropical Medicine & International Health* 2007. 12(10), 1248-1257
  40. Weeks AD, Alia G, Ononge S, Otolorin EO, Mirembe FM. A criteria-based audit of the management of severe pre-eclampsia in Kampala, Uganda. *Int J Gynaecol Obstet*. 2005 Dec;91(3):292-7; discussion 283-4.
  41. Wagaarachchi PT, Graham WJ, Penney GC, McCaw-Binns A, Yeboah Antwi K, Hall MH. Holding up a mirror: changing obstetric practice through criterion-based clinical audit in developing countries. *Int J Gynaecol Obstet*. 2001 Aug;74(2):119-30
  42. Lazzerini M, Richardson S, Ciardelli S, Erenbourg A. Effectiveness of the facility based maternal near-miss case reviews in improving maternal and newborn quality of care in low and middle income countries: systematic review (submitted for publication to BMJ Open in September 2017)

**Table 1. Characteristics of the countries and of the maternity units assessed**

|                                                                | Armenia                  | Georgia                  | Latvia                    | Moldova                   | Uzbekistan               |
|----------------------------------------------------------------|--------------------------|--------------------------|---------------------------|---------------------------|--------------------------|
| World Bank Classification <sup>1</sup>                         | Lower middle income      | Upper Middle Income      | High income               | Lower middle income       | Lower middle income      |
| Population (thousands), total*                                 | 2969                     | 4358                     | 2060                      | 3514                      | 28541                    |
| GNI per capita, PPP US\$*                                      | 6990                     | 3280                     | 21020                     | 3690                      | 1720                     |
| Maternal mortality ratio, adjusted*                            | 30                       | 67                       | 34                        | 41                        | 28                       |
| Neonatal mortality rate <sup>2</sup>                           | 10                       | 15                       | 5                         | 9                         | 14                       |
| Institutional deliveries as % of total deliveries <sup>2</sup> | 99.4                     | 98.3                     | NA                        | 99.4                      | 97.3                     |
| National introductory workshop on NMCR <sup>3</sup>            | 2007                     |                          | 2012                      | 2005                      | 2005                     |
| First national technical workshop on NMCR <sup>3</sup>         | 2009                     | 2015                     | 2013                      | 2005                      | 2007                     |
| Number of hospital implementing NMCR <sup>3</sup>              | 3                        | 6                        | 2                         | 13                        | 62                       |
| Number of hospital assessed                                    | 3                        | 6                        | 2                         | 6                         | 6                        |
| Type of hospitals                                              | 1 regional<br>2 district | 2 regional<br>4 district | 1 regional,<br>1 district | 2 regional,<br>4 district | 3 regional<br>3 district |
| Number of births/year in the hospital assessed **              | 6125                     | 8570                     | 8152                      | 13311                     | 23309                    |

<sup>1</sup> Source: The World Bank, Country and Lending Groups. (2014) Historical classification. Available: <https://datahelpdesk.worldbank.org/knowledgebase/articles/906519> (Accessed 9 March 2017).

<sup>2</sup> Source: UNICEF Country statistics [http://www.unicef.org/statistics/index\\_countrystats.html](http://www.unicef.org/statistics/index_countrystats.html) (accessed Dec 7, 2016)

<sup>3</sup> Source: WHO mission reports

**Table 2. Summary scores**

1  
2  
3  
4  
5  
6  
7  
8  
9  
10  
11  
12  
13  
14  
15  
16  
17  
18  
19  
20  
21  
22  
23  
24

|                                         | A   |     |     | B   |     |     |     |     |     | C   |     | D   |     |     |     |     |     | E   |     |     |     |     |     | Mean (95%CI)  | Median (IQL range) |
|-----------------------------------------|-----|-----|-----|-----|-----|-----|-----|-----|-----|-----|-----|-----|-----|-----|-----|-----|-----|-----|-----|-----|-----|-----|-----|---------------|--------------------|
|                                         | H1  | H2  | H3  | H1  | H2  | H3  | H4  | H5  | H6  | H1  | H2  | H1  | H2  | H3  | H4  | H5  | H6  | H1  | H2  | H3  | H4  | H5  | H6  |               |                    |
| 1. Internal organisation                | 1   | 1   | 2.5 | 1   | 2.1 | 0.8 | 2.8 | 2.3 | 1.9 | 3   | 2   | 1.7 | 1.9 | 1.9 | 1.6 | 2.5 | 0.5 | 2.9 | 2.6 | 2.7 | 2.3 | 2.7 | 2.3 | 2.0 (1.3-2.6) | 2.1 (1.7-2.5)      |
| 2. Case identification                  | 2.3 | 1   | 1.5 | 2   | 3   | 2   | 3   | 3   | 3   | 3   | 2.3 | 2.2 | 2.5 | 2.8 | 3   | 2   | 2.1 | 3   | 3   | 3   | 3   | 0.7 | 3   | 1.7 (1.0-2.4) | 2.8 (2.0-3.0)      |
| 3. Respect of ground rules              | 1.5 | 1.5 | 2.5 | 1   | 2   | 1   | 3   | 3   | 2   | 3   | 3   | 2   | 1.5 | 1   | 1.5 | 2   | 1   | 3   | 3   | 3   | 3   | 3   | 3   | 2.2 (1.4-2.9) | 2.2 (1.5-3.0)      |
| 4. Case presentation                    | 1.6 | 1.4 | 2   | 0.3 | 2   | 0.7 | 2.3 | 2   | 0.7 | 2.5 | 3   | 1.8 | 0.8 | 2.5 | 1.7 | 2.3 | 1.2 | 2.3 | 1.7 | 1.3 | 1   | 2   | 2   | 1.7 (1.0-2.3) | 1.8 (1.1-2.2)      |
| 5. Inclusion of users views             | 0   | 0   | 0   | 0.3 | 1.7 | 0   | 3   | 1.2 | 0.5 | 2.5 | 1.3 | 0.3 | 0   | 2   | 0   | 1.4 | 0   | 1.8 | 2.6 | 2   | 1.4 | 1.2 | 1.2 | 1.0 (0.1-2.0) | 1.2 (0.3-1.7)      |
| 6. Case analysis                        | 1.5 | 1   | 2.5 | 0.1 | 1.4 | 0.3 | 2   | 1.6 | 1.2 | 2.1 | 2.6 | 2.2 | 0.9 | 2   | 1.4 | 1.3 | 0.7 | 2.5 | 2.8 | 1.7 | 1   | 2.4 | 1.3 | 1.5 (0.8-2.3) | 1.5 (1.1-2.0)      |
| 7. Development of recommendations       | 0.3 | 1   | 2   | 0.1 | 1.1 | 0   | 2   | 1.8 | 1.7 | 1.8 | 2.6 | 1.8 | 0.1 | 2.3 | 1   | 1.9 | 0.4 | 3   | 2.6 | 1.7 | 1   | 2.3 | 1.3 | 1.4 (0.6-2.3) | 1.7 (1.0-1.9)      |
| 8. Implementation of recommendations    | 0   | 0.5 | 2   | 0   | 0   | 0   | 1   | 1.7 | 2   | 2   | 1.3 | 0.8 | 0   | 3   | 0.8 | 2   | 0.5 | 3   | 2.5 | 1.5 | 2.5 | 3   | 3   | 1.4 (0.3-2.4) | 1.5 (0.8-2.3)      |
| 9. Follow up                            | 0   | 0   | 1.5 | 0   | 0   | 0   | 0   | 0   | 3   | 2   | 2.5 | 0   | 0   | 3   | 0   | 1.6 | 1.3 | 2.8 | 1.5 | 1.5 | 1.5 | 2   | 1.5 | 1.1 (0.4-2.2) | 1.5 (0.0-1.9)      |
| 10. Documentation and results diffusion | 0.3 | 0.3 | 2   | 0.5 | 1   | 0.5 | 2.5 | 1   | 2   | 1.7 | 1   | 0.8 | 0.6 | 1.5 | 1.1 | 0.6 | 0.3 | 1.8 | 2   | 2.5 | 2   | 2.7 | 1   | 1.2 (0.5-2.0) | 1.1 (0.7-1.9)      |
| 11. Ensuring quality in the NMCR        | 0   | 0   | 0   | NA  | NA  | NA  | NA  | NA  | NA  | 1   | 1   | 0   | 0   | 0   | 0   | 1   | 0.3 | 1.5 | 1.7 | 1.2 | 1.2 | 1.2 | 1.2 | 0.6 (0.1-1.2) | 1.0 (0.1-1.2)      |

NA= in country B piloting started only six months before the quality assessment; for this reason the domain 11 was considered not applicable (NA)

**Colour legend**

- RED= scores between 0.0 to 0.9
- YELLOW= scores between 1.0 at 1.9
- GREEN= scores between 2.0 at 3.0

45  
46  
47

**Table 3. Strengths and weaknesses observed in the quality of the NMCR implementation**

|                     | <b>STRENGTHS</b>                                                                                                                                                                                                                                                                                                                                                                                                                                                                                                                                                                                                                                                                                                   | <b>WEAKNESSES</b>                                                                                                                                                                                                                                                                                                                                                                                                                                                                                                                                                                                                                                                                                                                                                                                                            |
|---------------------|--------------------------------------------------------------------------------------------------------------------------------------------------------------------------------------------------------------------------------------------------------------------------------------------------------------------------------------------------------------------------------------------------------------------------------------------------------------------------------------------------------------------------------------------------------------------------------------------------------------------------------------------------------------------------------------------------------------------|------------------------------------------------------------------------------------------------------------------------------------------------------------------------------------------------------------------------------------------------------------------------------------------------------------------------------------------------------------------------------------------------------------------------------------------------------------------------------------------------------------------------------------------------------------------------------------------------------------------------------------------------------------------------------------------------------------------------------------------------------------------------------------------------------------------------------|
| <b>TECHNICAL</b>    | <p>In all countries:</p> <ul style="list-style-type: none"> <li>▪ Technical skills on performing NMCR were on average fair</li> <li>▪ Local protocols were on average present and used</li> <li>▪ Recommendations were usually developed, with several SMART characteristics (Achievable, Realistic, Time-bound)</li> </ul> <p>Especially in Country E:</p> <ul style="list-style-type: none"> <li>▪ Most maternity teams were able to analyze efficiently a NM case, and to develop relevant recommendations to improve quality and organization of care, and follow-up their implementation.</li> </ul>                                                                                                          | <ul style="list-style-type: none"> <li>▪ Case definition not complying with national definition</li> <li>▪ Lack of existence and use of local protocols for case analysis</li> <li>▪ Some lack of knowledge and skills in NMCR methodology</li> <li>▪ Case summary, case reconstruction door-to-door, case analysis (including getting to the real point, and what we did good, and identifications of the underlying reasons using the 'why-but-why') not performed well performed in all facilities</li> <li>▪ Recommendations not fully SMART* (often not Specific nor Measurable)</li> </ul>                                                                                                                                                                                                                             |
| <b>ORGANISATION</b> | <p>In all countries:</p> <ul style="list-style-type: none"> <li>▪ Staffing at all levels (including midwives and nurses) was involved and in some cases encouraged by facilitator to actively participate in the review process.</li> <li>▪ Session participants were mostly those involved in care provision of the case reviewed, and, generally, felt free to ask questions and express their opinions.</li> <li>▪ NMCR mostly happened on a regular basis</li> </ul> <p>Especially in Country E:</p> <ul style="list-style-type: none"> <li>▪ An excellent national plan for implementation was developed</li> <li>▪ Appropriate normative regulations were developed through regular NMCR sessions</li> </ul> | <ul style="list-style-type: none"> <li>▪ Lack of local written procedure for NMCR</li> <li>▪ Irregular meetings in some facilities</li> <li>▪ Lack of involvement of staffing who managed the case</li> <li>▪ Lack of a regional/national coordination and/or continuity in facilitator/coordinator role, and/or support from them</li> <li>▪ Lack of trained interviewers</li> <li>▪ Absence of local leaders</li> <li>▪ Lack of support from hospital manager in organisation of the NMCR and in the implementation of the recommendation</li> <li>▪ Lack of follow up on previous recommendations</li> <li>▪ Lack of production, dissemination and discussion of results of the NMCR cycle</li> <li>▪ Lack of periodical evaluations of the quality of the NMCR</li> <li>▪ When evaluations of the quality was</li> </ul> |

|                 |                                                                                                                                                                                                                                                                                                                                                                                                                                                                                                                                                                                                                                                                                                                                                                                                                                                                                                                                                                                                                                                                                                                                                                          |                                                                                                                                                                                                                                                                                                                                                                                                                                                                                                                                                                                                                                                                                                                                                                                                                                                                                                                              |
|-----------------|--------------------------------------------------------------------------------------------------------------------------------------------------------------------------------------------------------------------------------------------------------------------------------------------------------------------------------------------------------------------------------------------------------------------------------------------------------------------------------------------------------------------------------------------------------------------------------------------------------------------------------------------------------------------------------------------------------------------------------------------------------------------------------------------------------------------------------------------------------------------------------------------------------------------------------------------------------------------------------------------------------------------------------------------------------------------------------------------------------------------------------------------------------------------------|------------------------------------------------------------------------------------------------------------------------------------------------------------------------------------------------------------------------------------------------------------------------------------------------------------------------------------------------------------------------------------------------------------------------------------------------------------------------------------------------------------------------------------------------------------------------------------------------------------------------------------------------------------------------------------------------------------------------------------------------------------------------------------------------------------------------------------------------------------------------------------------------------------------------------|
|                 | <ul style="list-style-type: none"> <li>▪ By 2015, 90% of maternity facilities were trained and implementing NMCR</li> <li>Regional NMCR coordinators were established</li> <li>▪ There was sustained support from MoH; WHO and partners (also Latvia)</li> </ul>                                                                                                                                                                                                                                                                                                                                                                                                                                                                                                                                                                                                                                                                                                                                                                                                                                                                                                         | <p>performed, no mechanism ensured that resulting recommendations were taken up</p>                                                                                                                                                                                                                                                                                                                                                                                                                                                                                                                                                                                                                                                                                                                                                                                                                                          |
| <b>ATTITUDE</b> | <p>In all countries</p> <ul style="list-style-type: none"> <li>▪ Basic BTN principles were respected in most facilities, including confidentiality</li> <li>▪ Multidisciplinary approach to case reviews was evident in most facilities <ul style="list-style-type: none"> <li>▪ Managers offered substantial support to organization of NMCR sessions and implementation of recommendations.</li> </ul> </li> <li>▪ Staff found this method useful to improve quality and organization of care</li> <li>▪ Midwives role as participants, but also as coordinators and facilitators</li> </ul> <p>Interviews became a routine in most facilities (in particular in Latvia)</p> <p>Especially in Country E::</p> <ul style="list-style-type: none"> <li>▪ Facilitators succeeded to create and maintain an open and non-threatening environment during sessions; staff felt free to put forward (or ask) questions and express their opinions (also Country C)</li> <li>▪ The point of view of women was always collected and presented; some interviews were of excellent quality (also Country C)</li> <li>▪ Professionals were praised in case of good care</li> </ul> | <ul style="list-style-type: none"> <li>▪ In some cases lack of respect of other people's opinion, persistence of blaming, persistence of a wrong attitude that suggested "judging others", rather than moving towards thinking "the review is about us"</li> <li>▪ Lack of active participation in the discussion</li> <li>▪ Insufficient involvement of mid-level staffing</li> <li>▪ Lack of the interviews with woman in some facilities</li> <li>▪ Even where the interview was collected, women's view not taken into account when recommendation are implemented</li> <li>▪ Staff not always praised when quality and appropriate care given</li> <li>▪ Staff considers developing recommendations a mere formality, they were not eager to implement them, and take on the role and the responsibility to change practice.</li> <li>▪ Persistence of a system that advocates punishment in some facilities</li> </ul> |

Abbreviations: NM= near-miss; NMCR= near-miss case review; SMART= Specific, Measurable, Achievable, Realistic, Time-bound (15)

**Table 4. Recommendations made by local stakeholders on how to improve NMCR quality**

|                                           |                                                                                                                                                                                                                                                                                                                                                                                                                                                                                                                                                                                                                                                                                                                                                                                                                                                                                                                                                                                                 |
|-------------------------------------------|-------------------------------------------------------------------------------------------------------------------------------------------------------------------------------------------------------------------------------------------------------------------------------------------------------------------------------------------------------------------------------------------------------------------------------------------------------------------------------------------------------------------------------------------------------------------------------------------------------------------------------------------------------------------------------------------------------------------------------------------------------------------------------------------------------------------------------------------------------------------------------------------------------------------------------------------------------------------------------------------------|
| <b>Hospital level</b>                     | <ol style="list-style-type: none"> <li>1) Ensure managerial support for the organisation of the NMCR and for the implementation of the resulting recommendations</li> <li>2) Aim at regular sessions</li> <li>3) Ensure active participation of all staff involved in case management, including mid-level staffing</li> <li>4) Ensure that ground rules are respected</li> <li>5) Ensure that the review follows the steps suggested in the WHO manual <sup>(7)</sup></li> <li>6) Ensure that user's views are collected and taken into consideration</li> <li>7) Ensure that recommendations developed are SMART*</li> <li>8) Ensure that every session starts by following up on the previous recommendations</li> <li>9) Document the implementation of the recommendations (provide date and description)</li> <li>10) Document, analyse and disseminate results of the NMCR at hospital level, including type of recommendations developed and percentage of those implemented</li> </ol> |
| <b>National level</b>                     | <ol style="list-style-type: none"> <li>1) Set up/strengthen the national coordinating team</li> <li>2) Develop a plan for regular quality assessment and reinforcement</li> <li>3) Strengthen technical skills among staffing on the principles, methods and practices of the NMCR cycle</li> <li>4) Practical training on how to conduct interviews in order to collect women's views</li> <li>5) Support networking activities among facilities (eg exchange visits)</li> <li>6) Document, analyse and disseminate results of the NMCR at national level</li> </ol>                                                                                                                                                                                                                                                                                                                                                                                                                           |
| <b>WHO and other development partners</b> | <ol style="list-style-type: none"> <li>1) Ensure regular and timely technical support for capacity development, including developing skills for women interviews</li> <li>2) Provide support for developing legal framework and national guidance manual for NMCR</li> <li>3) Support regular monitoring of the implementation in a coordinated manner</li> <li>4) Support results dissemination and discussion</li> <li>5) Support timely quality assessments and subsequent actions for quality improvement</li> <li>6) Support networking activities among facilities /countries with the objective of improve quality of NMCR cycle</li> <li>7) Ensure continuous support for updating key national guidelines, local protocols, standards for clinical practice</li> </ol>                                                                                                                                                                                                                 |

Abbreviations: NM= near-miss; NMCR= near-miss case review; SMART= Specific, Measurable, Achievable, Realistic, Time-bound (15)

**Table S1. Checklist to assess the quality of the NMCR cycle at hospital level and matrix to develop local recommendations**

| <b>Checklist to assess the quality of the NMCR cycle at hospital level and matrix to develop local recommendations</b>                                                                                                                                                                                                                                                                                                                                                                                                                                                                                                                                                                                                                                                                                                                                                                                                                                                                                                                                                                                                                                                                                                                                                                                                                                                                                                                                                                                                                                                                                                                                                                                                                                                                                                                                                                                                                           |
|--------------------------------------------------------------------------------------------------------------------------------------------------------------------------------------------------------------------------------------------------------------------------------------------------------------------------------------------------------------------------------------------------------------------------------------------------------------------------------------------------------------------------------------------------------------------------------------------------------------------------------------------------------------------------------------------------------------------------------------------------------------------------------------------------------------------------------------------------------------------------------------------------------------------------------------------------------------------------------------------------------------------------------------------------------------------------------------------------------------------------------------------------------------------------------------------------------------------------------------------------------------------------------------------------------------------------------------------------------------------------------------------------------------------------------------------------------------------------------------------------------------------------------------------------------------------------------------------------------------------------------------------------------------------------------------------------------------------------------------------------------------------------------------------------------------------------------------------------------------------------------------------------------------------------------------------------|
| Facility name _____ Date _____                                                                                                                                                                                                                                                                                                                                                                                                                                                                                                                                                                                                                                                                                                                                                                                                                                                                                                                                                                                                                                                                                                                                                                                                                                                                                                                                                                                                                                                                                                                                                                                                                                                                                                                                                                                                                                                                                                                   |
| <p><b>INSTRUCTIONS</b></p> <p>Sources of information:</p> <ul style="list-style-type: none"> <li>▶ Direct observation and evaluation of a NMCR session</li> <li>▶ Discussion with participants</li> <li>▶ Discussion with coordinators and managers                             <ul style="list-style-type: none"> <li>➢ Documents from the NMCR sessions: Records/notes of the sessions: templates, cases summaries, summary of the interviews with women and other care-takers (family, documents in support of the recommendations and their implementation, other related documentation (photo etc.)</li> </ul> </li> <li>▶ Other related documents:                             <ul style="list-style-type: none"> <li>National documents                                     <ul style="list-style-type: none"> <li>➢ National policies, and guidance documents</li> <li>➢ National clinical guidelines</li> <li>➢ National documents related to quality assurance, monitoring and supervision</li> <li>➢ National summary reports on NMCR implementation</li> </ul> </li> <li>Local documents                                     <ul style="list-style-type: none"> <li>➢ Regional/local policies, and guidance documents</li> <li>➢ Local clinical protocols and standards for care provision</li> <li>➢ Local documents related to quality assurance, monitoring and supervision</li> <li>➢ Local summary reports</li> </ul> </li> </ul> </li> </ul> <p>Reference: the reference for all key items is the WHO manual "How to implement the maternal Near-Miss Case Review (NMCR) cycle at hospital level"</p> <p>Methods of scoring:</p> <p>1) Score each single item as follows: Score 0= totally inappropriate; Score 1= major problems; Score 2= some deficiencies; Score 3= appropriate.</p> <p>2) In the blue row calculate the mean of the scores for each key item in the group. This is the score for that group of items.</p> |

|                                                                                                                         | <b>SCORE</b> | <b>Comments</b> |
|-------------------------------------------------------------------------------------------------------------------------|--------------|-----------------|
| <b>INTERNAL ORGANISATION/PREPARATION</b>                                                                                |              |                 |
| 1. A local written procedure to implement the NMCR cycle exists                                                         |              |                 |
| 2. Support from management is adequate                                                                                  |              |                 |
| 3. Regular meetings are held                                                                                            |              |                 |
| 4. Each meeting has adequate duration                                                                                   |              |                 |
| 5. All key staff involved in the NM case is invited to the session                                                      |              |                 |
| 6. Very limited (and justified) participation of people who were not involved in the management of the NM case reviewed |              |                 |
| 7. All material need is prepared before the session                                                                     |              |                 |
| <b>CASE IDENTIFICATION AND SELECTION</b>                                                                                |              |                 |
| 8. The agreed NM definition is used (same definition in all the country)                                                |              |                 |



|                                                                                                                                                                                                                      |  |  |
|----------------------------------------------------------------------------------------------------------------------------------------------------------------------------------------------------------------------|--|--|
| 9. The NM cases are correctly identified                                                                                                                                                                             |  |  |
| 10. A NM case is appropriately selected for review among those identified                                                                                                                                            |  |  |
| <b>GROUND RULES</b>                                                                                                                                                                                                  |  |  |
| 11. Ground rules for the NMCR are respected, especially confidentiality, respect of other people's opinion and refrain from blaming single individuals                                                               |  |  |
| <b>NMCR SESSION: CASE PRESENTATION</b>                                                                                                                                                                               |  |  |
| 12. The case is appropriately summarised and presented by one participant (paper copies; flip charts; slides)                                                                                                        |  |  |
| 13. A "door to door" reconstruction, with all relevant details, is provided by all staff involved in care provision                                                                                                  |  |  |
| 14. The clinical records of the patient, whose case is reviewed, are available during the meeting, if additional information is needed                                                                               |  |  |
| <b>NMCR SESSION: INCLUSION OF USERS VIEWS</b>                                                                                                                                                                        |  |  |
| 15. The opinions of the woman ( <i>i.e. informative contents on real facts, and her perceptions and views</i> ), and if appropriate of relatives and/or friends, is collected (interview), for each NM case reviewed |  |  |
| 16. The interview(s) is/are appropriately summarised and presented                                                                                                                                                   |  |  |
| 17. The key findings from the interview ( <i>i.e. same definition as above</i> ) are appropriately taken into consideration in the case analysis                                                                     |  |  |
| 18. The key findings ( <i>i.e. same definition as above</i> ) from the interview are appropriately taken into consideration for the prioritisation and development of solution                                       |  |  |
| <b>NMCR SESSION: CASE ANALYSIS</b>                                                                                                                                                                                   |  |  |
| 19. The case-analysis is performed following a structured analytical approach                                                                                                                                        |  |  |
| 20. The case management is analysed from admission to discharge: a "door to door" approach is used                                                                                                                   |  |  |
| 21. The case is reviewed comparing actual management versus evidence (clinical guidelines, protocols and standards)                                                                                                  |  |  |
| 22. The positive aspects of care provision ("what we did good") are identified and documented                                                                                                                        |  |  |
| 23. The staff is praised for the positive aspects of care provision                                                                                                                                                  |  |  |
| 24. The critical aspects of care ("what did not go well") are appropriately identified, focusing on the most important issues ("getting to the real point")                                                          |  |  |
| 25. The real underlying reasons for substandard care ("why but why?") are identified, discussed and documented                                                                                                       |  |  |
| 26. The facilitator ensures that ground rules are respected, all steps of the session are completed, notes are taken                                                                                                 |  |  |
| 27. Staff of all types and roles (including midwives and nurses) actively and openly participate in the case analysis                                                                                                |  |  |
| 28. The results of the case-analysis are documented (using the templates)                                                                                                                                            |  |  |
| <b>NMCR SESSION: DEVELOPMENT OF RECOMMENDATIONS</b>                                                                                                                                                                  |  |  |
| 29. A list of SPECIFIC recommendations linked to the NM case is always developed, including responsible people and timelines                                                                                         |  |  |
| 30. The recommendations target the main problem (s) and the main underlying factors                                                                                                                                  |  |  |

|                                                                                                                                                                                                                                          |  |  |
|------------------------------------------------------------------------------------------------------------------------------------------------------------------------------------------------------------------------------------------|--|--|
| 31. Most of the recommendations refer to actions to be carried forward at the hospital performing the review                                                                                                                             |  |  |
| 32. The recommendations use as reference clinical guidelines, protocols and standards                                                                                                                                                    |  |  |
| 33. The recommendations are SMART (specific, measurable, achievable, realistic, time-bound)                                                                                                                                              |  |  |
| 34. The recommendations give due consideration to women's rights in hospital: effective communication, emotional support, respect and dignity                                                                                            |  |  |
| 35. The recommendations include an adequate division of tasks among hospital staff                                                                                                                                                       |  |  |
| 36. Recommendations that need action at regional/national level are effectively identified                                                                                                                                               |  |  |
| 37. The facilitator ensures that ground rules are respected, all steps of the session are completed, notes are taken                                                                                                                     |  |  |
| 38. Staff of all types and roles (including midwives and nurses) participate actively and openly                                                                                                                                         |  |  |
| 39. The recommendations are documented (using the templates)                                                                                                                                                                             |  |  |
| <b>IMPLEMENTATION OF RECCOMENDATIONS</b>                                                                                                                                                                                                 |  |  |
| 40. The agreed recommendations are implemented (at least 75%)                                                                                                                                                                            |  |  |
| 41. Managers/local health authorities actively support implementation of recommendations                                                                                                                                                 |  |  |
| 42. The implementation of recommendations is documented (using the template)                                                                                                                                                             |  |  |
| <b>NMCR SESSION: FOLLOW UP</b>                                                                                                                                                                                                           |  |  |
| 43. The NMCR session starts with a follow up of the previous session, checking that recommendations have been implemented                                                                                                                |  |  |
| 44. In case the agreed actions were not taken, reasons are discussed, and a new recommendation is developed, including responsible people and timelines                                                                                  |  |  |
| <b>DOCUMENTATIONS ON THE NMCR CYCLE AND EFFECTIVE DIFFUSION OF RESULTS - AT FACILITY LEVEL</b>                                                                                                                                           |  |  |
| 45. A folder is kept for each NM case containing all key documentation, including the follow up phase (see manual); cases are recorded in a register/log book                                                                            |  |  |
| 46. At hospital level, an appropriate summary of relevant information regarding the NMCR cycle is regularly disseminated and discussed, without compromising confidentiality, among staff, managers, and health authorities (see manual) |  |  |
| 47. Effective communication of key information is provided by hospital coordinators to national coordinator(s)                                                                                                                           |  |  |
| <b>ENSURING QUALITY IN THE NMCR CYCLE</b>                                                                                                                                                                                                |  |  |
| 48. Collaboration of the local team with the national/regional coordinator has been effective                                                                                                                                            |  |  |
| 49. Periodical evaluations of the quality of the NMCR has been planned                                                                                                                                                                   |  |  |
| 50. Previous recommendations from quality assessment has been taken into consideration and translated into actions                                                                                                                       |  |  |

**SUMMARY TABLE**

|                                                                        |
|------------------------------------------------------------------------|
| <p><b>MAIN STRENGTHS:</b></p> <p>1.</p> <p>2.</p> <p>3.</p> <p>4.</p>  |
| <p><b>MAIN WEAKNESSES:</b></p> <p>1.</p> <p>2.</p> <p>3.</p> <p>4.</p> |
| <p><b>COMMENTS:</b></p> <p>1.</p> <p>2.</p> <p>3.</p> <p>4.</p>        |

| <b>MATRIX. Recommendations for improving the quality of the NMCR cycle at hospital level (expand as needed)</b> |               |                    |          |
|-----------------------------------------------------------------------------------------------------------------|---------------|--------------------|----------|
| Priority areas that need to be improved                                                                         | Action agreed | Responsible person | Timeline |
|                                                                                                                 |               |                    |          |
|                                                                                                                 |               |                    |          |
|                                                                                                                 |               |                    |          |
|                                                                                                                 |               |                    |          |
|                                                                                                                 |               |                    |          |
|                                                                                                                 |               |                    |          |
|                                                                                                                 |               |                    |          |
|                                                                                                                 |               |                    |          |
|                                                                                                                 |               |                    |          |
|                                                                                                                 |               |                    |          |

**Table S2. Reported impact of the NMCR on quality of care at facility level**

- Use of national clinical guidelines
- Development and use of protocols at facility level (for doctors and for midwives) for obstetric complications (eg post-partum haemorrhages, eclampsia, sepsis)
- Development and implementation of standards of care
- Development of capacities among staff of all levels (doctors, midwives, nurses) to critically analyse cases identifying real underlying reasons for near-miss (eg lack of organisation or lack of communication), comparing management to guidelines, protocols and standards of care, and to successfully carry forward a self-assessment
- Improved autonomy of mid level staff, in particular midwives providing first emergency care without doctors
- Availability of emergency team 24/24h in case of emergencies
- In the admission and on labour ward, a system in place which allows to call all relevant staff in case of an emergency (emergency button)
- Availability of emergency lab 24/24h
- Availability of staff 24/24h in the event of a need for blood transfusion, especially in rural areas
- Set up of separate room for managing emergency cases
- Availability of emergency kit for managing emergency cases
- Improved availability of essential drugs, such as misoprostol, i/v antihypertensive
- Enhanced collaboration between clinical staff and management of the facility, for improving practical aspects of organisation of care (eg supplies, maintenance, staff shifts)
- Development of clear job description to specific roles and responsibilities, facilitating effective team work
- Improved monitoring after caesarean section and/or obstetric complications (eg training and use of checklists)
- Improved team work
- Reported improvement in quality of care delivered \*

\*not further specified in available local/national reports.
