# Supplementary material for: What is the quality of the maternal near-miss case reviews in WHO European Region? Cross-sectional study in Armenia, Georgia, Latvia, Republic of Moldova and Uzbekistan
Source: PubMed Central journal article supplement — BMJ Open. 2018 Apr 12;8(4):e017696. doi: 10.1136/bmjopen-2017-017696 (PMC5898291; doi:10.1136/bmjopen-2017-017696), 2018-04-12
Supplement: bmjopen-2017-017696supp001.pdf [file bmjopen-2017-017696supp001.pdf]

**Table S1. Checklist to assess the quality of the NMCR cycle at hospital level and matrix to develop local recommendations**

| <b>Checklist to assess the quality of the NMCR cycle at hospital level and matrix to develop local recommendations</b>                                                                                                                                                                                                                                                                                                                                                                                                                                                                                                                                                                                                                                                                                                                                                                                                                                                                                                                                                                                                                                                                                                                                                                                                               |            |
|--------------------------------------------------------------------------------------------------------------------------------------------------------------------------------------------------------------------------------------------------------------------------------------------------------------------------------------------------------------------------------------------------------------------------------------------------------------------------------------------------------------------------------------------------------------------------------------------------------------------------------------------------------------------------------------------------------------------------------------------------------------------------------------------------------------------------------------------------------------------------------------------------------------------------------------------------------------------------------------------------------------------------------------------------------------------------------------------------------------------------------------------------------------------------------------------------------------------------------------------------------------------------------------------------------------------------------------|------------|
| Facility name _____                                                                                                                                                                                                                                                                                                                                                                                                                                                                                                                                                                                                                                                                                                                                                                                                                                                                                                                                                                                                                                                                                                                                                                                                                                                                                                                  | Date _____ |
| <b>INSTRUCTIONS</b>                                                                                                                                                                                                                                                                                                                                                                                                                                                                                                                                                                                                                                                                                                                                                                                                                                                                                                                                                                                                                                                                                                                                                                                                                                                                                                                  |            |
| Sources of information:                                                                                                                                                                                                                                                                                                                                                                                                                                                                                                                                                                                                                                                                                                                                                                                                                                                                                                                                                                                                                                                                                                                                                                                                                                                                                                              |            |
| <ul style="list-style-type: none"> <li>▶ Direct observation and evaluation of a NMCR session</li> <li>▶ Discussion with participants</li> <li>▶ Discussion with coordinators and managers               <ul style="list-style-type: none"> <li>➢ Documents from the NMCR sessions: Records/notes of the sessions: templates, cases summaries, summary of the interviews with women and other care-takers (family, documents in support of the recommendations and their implementation, other related documentation (photo etc.)</li> </ul> </li> <li>▶ Other related documents:               <ul style="list-style-type: none"> <li>National documents                   <ul style="list-style-type: none"> <li>➢ National policies, and guidance documents</li> <li>➢ National clinical guidelines</li> <li>➢ National documents related to quality assurance, monitoring and supervision</li> <li>➢ National summary reports on NMCR implementation</li> </ul> </li> <li>Local documents                   <ul style="list-style-type: none"> <li>➢ Regional/local policies, and guidance documents</li> <li>➢ Local clinical protocols and standards for care provision</li> <li>➢ Local documents related to quality assurance, monitoring and supervision</li> <li>➢ Local summary reports</li> </ul> </li> </ul> </li> </ul> |            |
| Reference: the reference for all key items is the WHO manual "How to implement the maternal Near-Miss Case Review (NMCR) cycle at hospital level"                                                                                                                                                                                                                                                                                                                                                                                                                                                                                                                                                                                                                                                                                                                                                                                                                                                                                                                                                                                                                                                                                                                                                                                    |            |
| Methods of scoring:                                                                                                                                                                                                                                                                                                                                                                                                                                                                                                                                                                                                                                                                                                                                                                                                                                                                                                                                                                                                                                                                                                                                                                                                                                                                                                                  |            |
| 1) Score each single item as follows: Score 0= totally inappropriate; Score 1= major problems; Score 2= some deficiencies; Score 3= appropriate.                                                                                                                                                                                                                                                                                                                                                                                                                                                                                                                                                                                                                                                                                                                                                                                                                                                                                                                                                                                                                                                                                                                                                                                     |            |
| 2) In the blue row calculate the mean of the scores for each key item in the group. This is the score for that group of items.                                                                                                                                                                                                                                                                                                                                                                                                                                                                                                                                                                                                                                                                                                                                                                                                                                                                                                                                                                                                                                                                                                                                                                                                       |            |

|                                                                                                                         | <b>SCORE</b> | <b>Comments</b> |
|-------------------------------------------------------------------------------------------------------------------------|--------------|-----------------|
| <b>INTERNAL ORGANISATION/PREPARATION</b>                                                                                |              |                 |
| 1. A local written procedure to implement the NMCR cycle exists                                                         |              |                 |
| 2. Support from management is adequate                                                                                  |              |                 |
| 3. Regular meetings are held                                                                                            |              |                 |
| 4. Each meeting has adequate duration                                                                                   |              |                 |
| 5. All key staff involved in the NM case is invited to the session                                                      |              |                 |
| 6. Very limited (and justified) participation of people who were not involved in the management of the NM case reviewed |              |                 |
| 7. All material need is prepared before the session                                                                     |              |                 |
| <b>CASE IDENTIFICATION AND SELECTION</b>                                                                                |              |                 |
| 8. The agreed NM definition is used (same definition in all the country)                                                |              |                 |

|                                                                                                                                                                                                                      |  |  |
|----------------------------------------------------------------------------------------------------------------------------------------------------------------------------------------------------------------------|--|--|
| 9. The NM cases are correctly identified                                                                                                                                                                             |  |  |
| 10. A NM case is appropriately selected for review among those identified                                                                                                                                            |  |  |
| <b>GROUND RULES</b>                                                                                                                                                                                                  |  |  |
| 11. Ground rules for the NMCR are respected, especially confidentiality, respect of other people's opinion and refrain from blaming single individuals                                                               |  |  |
| <b>NMCR SESSION: CASE PRESENTATION</b>                                                                                                                                                                               |  |  |
| 12. The case is appropriately summarised and presented by one participant (paper copies; flip charts; slides)                                                                                                        |  |  |
| 13. A "door to door" reconstruction, with all relevant details, is provided by all staff involved in care provision                                                                                                  |  |  |
| 14. The clinical records of the patient, whose case is reviewed, are available during the meeting, if additional information is needed                                                                               |  |  |
| <b>NMCR SESSION: INCLUSION OF USERS VIEWS</b>                                                                                                                                                                        |  |  |
| 15. The opinions of the woman ( <i>i.e. informative contents on real facts, and her perceptions and views</i> ), and if appropriate of relatives and/or friends, is collected (interview), for each NM case reviewed |  |  |
| 16. The interview(s) is/are appropriately summarised and presented                                                                                                                                                   |  |  |
| 17. The key findings from the interview ( <i>i.e. same definition as above</i> ) are appropriately taken into consideration in the case analysis                                                                     |  |  |
| 18. The key findings ( <i>i.e. same definition as above</i> ) from the interview are appropriately taken into consideration for the prioritisation and development of solution                                       |  |  |
| <b>NMCR SESSION: CASE ANALYSIS</b>                                                                                                                                                                                   |  |  |
| 19. The case-analysis is performed following a structured analytical approach                                                                                                                                        |  |  |
| 20. The case management is analysed from admission to discharge: a "door to door" approach is used                                                                                                                   |  |  |
| 21. The case is reviewed comparing actual management versus evidence (clinical guidelines, protocols and standards)                                                                                                  |  |  |
| 22. The positive aspects of care provision ("what we did good") are identified and documented                                                                                                                        |  |  |
| 23. The staff is praised for the positive aspects of care provision                                                                                                                                                  |  |  |
| 24. The critical aspects of care ("what did not go well") are appropriately identified, focusing on the most important issues ("getting to the real point")                                                          |  |  |
| 25. The real underlying reasons for substandard care ("why but why?") are identified, discussed and documented                                                                                                       |  |  |
| 26. The facilitator ensures that ground rules are respected, all steps of the session are completed, notes are taken                                                                                                 |  |  |
| 27. Staff of all types and roles (including midwives and nurses) actively and openly participate in the case analysis                                                                                                |  |  |
| 28. The results of the case-analysis are documented (using the templates)                                                                                                                                            |  |  |
| <b>NMCR SESSION: DEVELOPMENT OF RECOMMENDATIONS</b>                                                                                                                                                                  |  |  |
| 29. A list of SPECIFIC recommendations linked to the NM case is always developed, including responsible people and timelines                                                                                         |  |  |
| 30. The recommendations target the main problem (s) and the main underlying factors                                                                                                                                  |  |  |

|                                                                                                                                                                                                                                          |  |  |
|------------------------------------------------------------------------------------------------------------------------------------------------------------------------------------------------------------------------------------------|--|--|
| 31. Most of the recommendations refer to actions to be carried forward at the hospital performing the review                                                                                                                             |  |  |
| 32. The recommendations use as reference clinical guidelines, protocols and standards                                                                                                                                                    |  |  |
| 33. The recommendations are SMART (specific, measurable, achievable, realistic, time-bound)                                                                                                                                              |  |  |
| 34. The recommendations give due consideration to women's rights in hospital: effective communication, emotional support, respect and dignity                                                                                            |  |  |
| 35. The recommendations include an adequate division of tasks among hospital staff                                                                                                                                                       |  |  |
| 36. Recommendations that need action at regional/national level are effectively identified                                                                                                                                               |  |  |
| 37. The facilitator ensures that ground rules are respected, all steps of the session are completed, notes are taken                                                                                                                     |  |  |
| 38. Staff of all types and roles (including midwives and nurses) participate actively and openly                                                                                                                                         |  |  |
| 39. The recommendations are documented (using the templates)                                                                                                                                                                             |  |  |
| <b>IMPLEMENTATION OF RECCOMENDATIONS</b>                                                                                                                                                                                                 |  |  |
| 40. The agreed recommendations are implemented (at least 75%)                                                                                                                                                                            |  |  |
| 41. Managers/local health authorities actively support implementation of recommendations                                                                                                                                                 |  |  |
| 42. The implementation of recommendations is documented (using the template)                                                                                                                                                             |  |  |
| <b>NMCR SESSION: FOLLOW UP</b>                                                                                                                                                                                                           |  |  |
| 43. The NMCR session starts with a follow up of the previous session, checking that recommendations have been implemented                                                                                                                |  |  |
| 44. In case the agreed actions were not taken, reasons are discussed, and a new recommendation is developed, including responsible people and timelines                                                                                  |  |  |
| <b>DOCUMENTATIONS ON THE NMCR CYCLE AND EFFECTIVE DIFFUSION OF RESULTS - AT FACILITY LEVEL</b>                                                                                                                                           |  |  |
| 45. A folder is kept for each NM case containing all key documentation, including the follow up phase (see manual); cases are recorded in a register/log book                                                                            |  |  |
| 46. At hospital level, an appropriate summary of relevant information regarding the NMCR cycle is regularly disseminated and discussed, without compromising confidentiality, among staff, managers, and health authorities (see manual) |  |  |
| 47. Effective communication of key information is provided by hospital coordinators to national coordinator(s)                                                                                                                           |  |  |
| <b>ENSURING QUALITY IN THE NMCR CYCLE</b>                                                                                                                                                                                                |  |  |
| 48. Collaboration of the local team with the national/regional coordinator has been effective                                                                                                                                            |  |  |
| 49. Periodical evaluations of the quality of the NMCR has been planned                                                                                                                                                                   |  |  |
| 50. Previous recommendations from quality assessment has been taken into consideration and translated into actions                                                                                                                       |  |  |



**Table S2. Reported impact of the NMCR on quality of care at facility level**

- Use of national clinical guidelines
- Development and use of protocols at facility level (for doctors and for midwives) for obstetric complications (eg post-partum haemorrhages, eclampsia, sepsis)
- Development and implementation of standards of care
- Development of capacities among staff of all levels (doctors, midwives, nurses) to critically analyse cases identifying real underlying reasons for near-miss (eg lack of organisation or lack of communication), comparing management to guidelines, protocols and standards of care, and to successfully carry forward a self-assessment
- Improved autonomy of mid level staff, in particular midwives providing first emergency care without doctors
- Availability of emergency team 24/24h in case of emergencies ~~ease~~
- In the admission and on labour ward, a system in place which allows to call all relevant staff in case of an emergency (emergency button)
- Availability of emergency lab 24/24h
- Availability of staff 24/24h in the event of a need for blood transfusion, especially in rural areas
- Set up of separate room for managing emergency cases
- Availability of emergency kit for managing emergency cases
- Improved availability of essential drugs, such as misoprostol, i/v antihypertensive
- Enhanced collaboration between clinical staff and management of the facility, for improving practical aspects of organisation of care (eg supplies, maintenance, staff shifts)
- Development of clear job description to specific roles and responsibilities, facilitating effective team work
- Improved monitoring after caesarean section and/or obstetric complications (eg training and use of checklists)
- Improved team work
- Reported improvement in quality of care delivered \*

\*not further specified in available local/national reports.
